# Supplementary material for: Enantioselective sp3 C–H alkylation of γ-butyrolactam by a chiral Ir(i) catalyst for the synthesis of 4-substituted γ-amino acids
Source: Royal Society of Chemistry journal article supplement (doi:10.1039/c5cc07102j), 2015-01-01
Supplement: c5cc07102j1.pdf [file c5cc07102j1.pdf]

## Supplementary Information

### Enantioselective $sp^3$ C-H alkylation of $\gamma$ -butyrolactam by a chiral Ir(I) catalyst for the synthesis of 4-substituted $\gamma$ -amino acids

Yu-ki Tahara,<sup>a</sup> Masamichi Michino,<sup>a</sup> Mamoru Ito,<sup>a</sup> Kyalo Stephen Kanyiva<sup>b</sup> and Takanori Shibata<sup>\*a,c</sup>

<sup>a</sup> Department of Chemistry and Biochemistry, School of Advanced Science and Engineering, Waseda University, 3-4-1 Okubo, Shinjuku, Tokyo 169-8555, Japan.

<sup>b</sup> International Center for Science and Engineering Programs (ICSEP), Waseda University, 3-4-1 Okubo, Shinjuku, Tokyo 169-8555, Japan.

<sup>c</sup> JST, ACT-C, 4-1-8 Honcho, Kawaguchi, Saitama 332-0012, Japan.

\* E-mail: tshibata@waseda.jp

|                                                                              |    |
|------------------------------------------------------------------------------|----|
| 1) Experimental details and characterization data for new compounds.....     | 2  |
| 2) <sup>1</sup> H NMR and <sup>13</sup> C NMR spectra for new compounds..... | 26 |

## 1) Experimental details and characterization data for new compounds

**General information:**  $^1\text{H}$  NMR spectra were recorded on JEOL JNM-ECX500 (500 MHz) spectrometer. The chemical shifts were reported in parts per million ( $\delta$ ) relative to internal standard TMS (0 ppm) for  $\text{CDCl}_3$ , or external standard TMS (0 ppm) for  $\text{D}_2\text{O}$ . The peak patterns are indicated as follows: s, singlet; d, doublet; dd, doublet of doublet; t, triplet; m, multiplet; q, quartet. The coupling constants,  $J$ , are reported in Hertz (Hz).  $^{13}\text{C}$  NMR spectra were obtained by JEOL JNM-ECX500 (125 MHz) spectrometers and referenced to the internal solvent signals (central peak is 77.0 ppm in  $\text{CDCl}_3$ ), or external standard TMS (0 ppm) for  $\text{D}_2\text{O}$ .  $\text{CDCl}_3$  and  $\text{D}_2\text{O}$  were used as NMR solvents. High-resolution mass spectra (HRMS) were measured on a JMS-T100CS with ESI (Electro Spray Ionization) method. Optical rotations were measured on a JASCO DIP-1000 polarimeter. Preparative thin-layer chromatography (PTLC) was performed with silica gel-precoated glass plates (Merck 60 GF254) prepared in our laboratory, Flash column chromatography was performed over silica gel 200-300. All reagents were weighed and handled in air and backfilled under argon at room temperature. Unless otherwise noted, all reactions were performed under an argon atmosphere. All reagents were purchased from Aldrich, Kanto, TCI, and Wako, and used without further purification.

### Experimental procedure for the synthesis of $\gamma$ -lactam **1**<sup>1,2</sup>

To a dried two necked 50 mL flask CuI (2.0 mol%, 0.20 mmol, 38.1 mg) and  $\text{K}_2\text{CO}_3$  (2.0 eq., 20 mmol, 2.8 g) were added. The reaction vessel was evacuated and backfilled with argon ( $\times 3$ ), then 2-pyrrolidone (10.0 mmol, 851.1 mg),  $N,N'$ -dimethylethylenediamine (10 mol%, 1.0 mmol, 88.2 mg), 2-bromopyridine (1.5 eq., 15 mmol, 2.4 g) and toluene (20 mL) were added. The reaction mixture was refluxed for 24 h. After the reaction was completed, the solids were removed by celite filtration and washed with  $\text{CH}_2\text{Cl}_2$  ( $5 \times 5$  mL). Then the solvent was evaporated, and the crude products were purified by column chromatography on silica gel (hexane/ EtOAc = 3/1 to 2/1) to give pure  $\gamma$ -lactam **1** (1.62 g, quant.).

## Optimization of chiral catalyst

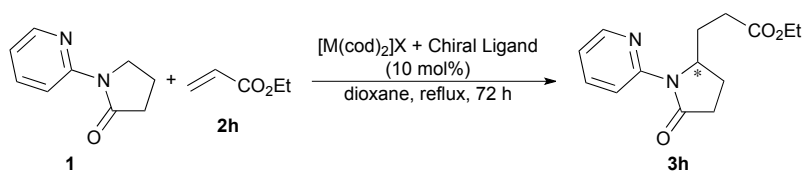

| Entry <sup>a</sup> | [M(cod) <sub>2</sub> ]X                | Chiral Ligand                         | Yield / % | Ee / % |
|--------------------|----------------------------------------|---------------------------------------|-----------|--------|
| 1                  | [Rh(cod) <sub>2</sub> ]BF <sub>4</sub> | ( <i>S</i> )-tolBINAP                 | N.R.      | -      |
| 2                  | [Rh(cod) <sub>2</sub> ]OTf             | ( <i>S</i> )-tolBINAP                 | N.R.      | -      |
| 3                  | [Ir(cod) <sub>2</sub> ]BF <sub>4</sub> | ( <i>S</i> )-tolBINAP                 | 87        | 91     |
| 4                  | [Ir(cod) <sub>2</sub> ]BARF            | ( <i>S</i> )-tolBINAP                 | 36        | 90     |
| 5                  | [Ir(cod) <sub>2</sub> ]OTf             | ( <i>S</i> )-tolBINAP                 | trace     | -      |
| 6                  | [Ir(cod) <sub>2</sub> ]BF <sub>4</sub> | ( <i>S</i> )-xyl-BINAP                | 15        | 91     |
| 7                  | [Ir(cod) <sub>2</sub> ]BF <sub>4</sub> | ( <i>S</i> )-H <sub>8</sub> -BINAP    | 2         | 91     |
| 8                  | [Ir(cod) <sub>2</sub> ]BF <sub>4</sub> | ( <i>R</i> )-DM-H <sub>8</sub> -BINAP | 35        | -6     |
| 9                  | [Ir(cod) <sub>2</sub> ]BF <sub>4</sub> | ( <i>S</i> )-SEGPPOS                  | trace     | -      |
| 10                 | [Ir(cod) <sub>2</sub> ]BF <sub>4</sub> | ( <i>S,S</i> )-Me-DUPHOS              | trace     | -      |
| 11                 | [Ir(cod) <sub>2</sub> ]BF <sub>4</sub> | ( <i>S</i> )-DIFLUORPHOS              | 3         | 63     |
| 12                 | [Ir(cod) <sub>2</sub> ]BF <sub>4</sub> | ( <i>S</i> )-C <sub>3</sub> -TUNEPHOS | 9         | 84     |

<sup>a</sup>  $\gamma$ -Lactam **1**/ethyl acrylate **2h** was 1/4. The initial substrate concentration was 0.5 M.

### General procedure for the enantioselective C-H alkylation of $\gamma$ -lactams **1**

$\gamma$ -Lactam **1** (0.20 mmol, 32.4 mg), (*S*)-tolBINAP (10 mol%, 13.6 mg) and [Ir(cod)<sub>2</sub>]BF<sub>4</sub> (10 mol%, 10.0 mg) were placed in a dried sealed tube, then capped with a rubber septum. The reaction vessel was evacuated and backfilled with argon ( $\times 3$ ), then alkene **2** (8.0 eq., 1.60 mmol) and degassed 1,4-dioxane (0.1 mL) was added, unless otherwise noted (entries 2 and 3 in Table 2). The rubber septum was rapidly changed with a screw cap flowing argon, and then refluxed. After the reaction was complete, the reaction mixture was cooled to room temperature and the crude products were purified by preparative TLC to give pure product **3**.

### General procedure for the transformation of $\gamma$ -lactam derivatives to $\gamma$ -amino acid derivatives<sup>3</sup>

$\gamma$ -Lactam derivatives **3** (0.20 mmol) and Pd(OH)<sub>2</sub>/C (20% Pd, wetted with ca.50% water, 20 mol%, 56.2 mg) were placed in a dried Schlenk tube capped with a rubber septum, then EtOH (1.8 mL) and 1.25 M HCl in EtOH (0.2 mL) were added. The reaction vessel was flushed with H<sub>2</sub> ( $\times 3$ ), then the mixture was stirred at room temperature for 24 h. The solids were removed by celite filtration and washed with CH<sub>2</sub>Cl<sub>2</sub> (5  $\times$  2 mL). Then the solvent was evaporated, and the crude products were obtained.

The crude products were placed in a dried two necked 30 mL flask. The reaction vessel was evacuated and backfilled with argon ( $\times 3$ ), then NaBH<sub>4</sub> (4.0 eq., 0.80 mmol, 30.4 mg) and MeOH (2.0 mL) were added carefully. The mixture was stirred at room temperature for 1 h. After the reaction was complete, the solvent was evaporated. The residue was purified by preparative TLC and the desired product **4** was obtained.

Next, a round-bottom 30 mL flask was charged with the  $\gamma$ -lactam **4** (0.1 mmol) and 6 N HCl (2.0 mL). The solution was heated to 100 °C and stirred overnight. After cooled at room temperature, the solvent was removed *in vacuo*. EtOAc (2.0 mL) was added to the reaction vessel, then the mixture was suspended by sonication and stirred at room temperature. After 1 h, the mixture was filtered and washed by EtOAc (3  $\times$  1 mL). The solid product **5** was obtained by filter paper washed with MeOH (5  $\times$  1 mL) and dried.

#### Experimental procedure for the synthesis of dihydro-pyrrolam A **7**<sup>3-5</sup>

$\gamma$ -Lactam derivatives (*S*)-**3h** (0.20 mmol, 52.4 mg) and Pd(OH)<sub>2</sub>/C (20% Pd, wetted with ca.50% water, 20 mol%, 56.2 mg) were placed in a dried Schlenk tube capped with a rubber septum, then EtOH (1.8 mL) and 1.25 M HCl in EtOH (0.2 mL) were added. The reaction vessel was flushed H<sub>2</sub> ( $\times$  3), then the mixture was stirred at room temperature for 24 h under H<sub>2</sub>. The residue was removed by celite filtration and washed with CH<sub>2</sub>Cl<sub>2</sub> (5  $\times$  2 mL). The solvent was evaporated, and the crude products were obtained.

The crude products were placed in a dried two necked 30 mL flask. The reaction vessel was evacuated and backfilled with argon ( $\times$  3), the reaction vessel was cooled at 0 °C. LiAlH<sub>4</sub> (2.4 eq., 0.48 mmol, 18.2 mg) and THF (1.0 mL) was added carefully. Then the mixture was stirred at room temperature for 2 h. The reaction was quenched by addition of Na<sub>2</sub>SO<sub>4</sub>•10H<sub>2</sub>O, then the solids were filtered and washed by CH<sub>2</sub>Cl<sub>2</sub> (8  $\times$  2 mL). The solvent was evaporated to give the crude solid products.

A dried Schlenk tube was charged with the crude solids and anhydrous CH<sub>2</sub>Cl<sub>2</sub> (2.0 mL). Triethylamine (4.0 eq., 0.8 mmol) and *N,N*-dimethyl-4-aminopyridine (3 mol%, 2.1 mg) were added in sequence to the solution. After cooled to 0 °C, *p*-toluenesulfonyl chloride (3.0 eq., 0.6 mmol, 114.4 mg) was added instantly. The mixture was stirred at 0 °C for 15 min, and then warmed to room temperature overnight. After the reaction was completed, saturated NaHCO<sub>3</sub> aq. was added to the solution. The mixture was extracted with CH<sub>2</sub>Cl<sub>2</sub> (4  $\times$  2 mL) and the resulting solution was dried with Na<sub>2</sub>SO<sub>4</sub>. After evaporation of the solution, the residue was purified by preparative TLC (CH<sub>2</sub>Cl<sub>2</sub>/MeOH = 95/5, R<sub>f</sub> = 0.5) and the desire solid **6** was afforded (35.1 mg, 59%).

$\gamma$ -Lactam derivative **6** (0.10 mmol, 29.7 mg) in THF (2.0 mL) was placed in a dried Schlenk tube. After the solution was cooled to 0 °C, Sodium hydride (1.1 eq., 0.11 mmol, 4.4 mg, 60 % dispersion in mineral oil) was added instantly under stirred. The reaction mixture was stirred at room temperature overnight. After the reaction was completed, the reaction mixture was cooled to 0 °C and quenched with saturated NH<sub>4</sub>Cl aq. Solution. The mixture was extracted with EtOAc (5  $\times$  2 mL) and the organic layer was dried over Na<sub>2</sub>SO<sub>4</sub>. After concentration under reduced pressure, the crude products were isolated by column chromatography on silica gel (EtOAc only) to give dihydro-pyrrolam A **7** (8.0 mg, 68%). [ $\alpha$ ]<sub>D</sub><sup>24</sup> = +30.3 (*c* 0.27, CHCl<sub>3</sub>).

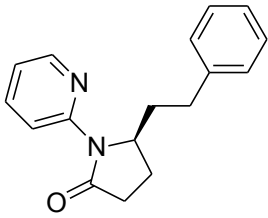

### 5-Phenethyl-1-(pyridin-2-yl)pyrrolidin-2-one (3a).

Isolated by preparative TLC (hexane/EtOAc = 2/1, R<sub>f</sub> = 0.5). The title compound was obtained as yellow oil (85%). <sup>1</sup>H NMR δ 8.37-8.35 (m, 1H), 8.21-8.19 (m, 1H), 7.69-7.66 (m, 1H), 7.27-7.24 (m, 2H, overlap with CHCl<sub>3</sub>), 7.18-7.14 (m, 3H), 7.03-7.01 (m, 1H), 4.87-4.82 (m, 1H), 2.79-2.65 (m, 3H), 2.60-2.53 (m, 1H), 2.32-2.19 (m, 2H), 1.97-1.91 (m, 1H), 1.84-1.76 (m, 1H); <sup>13</sup>C NMR δ 174.7, 151.1, 147.6, 141.3, 137.5, 128.3, 128.2, 125.9, 119.6, 116.4, 57.8, 34.5, 32.1, 31.6, 22.9. HRMS(ESI) calcd for C<sub>17</sub>H<sub>18</sub>N<sub>2</sub>NaO (M+Na): 289.1311; found: 289.1309. [α]<sup>31</sup><sub>D</sub> = +64.9 (c 1.02, CHCl<sub>3</sub>, 82% ee). Ee was determined by HPLC analysis using a chiral column (Daicel Chiralpak IA: 4.6 x 250 mm, 254 nm UV detector, rt, eluent: hexane/2-propanol = 19/1, flow rate: 1.0 mL/min, retention time: 12.0 min for major isomer and 10.5 min for minor isomer).

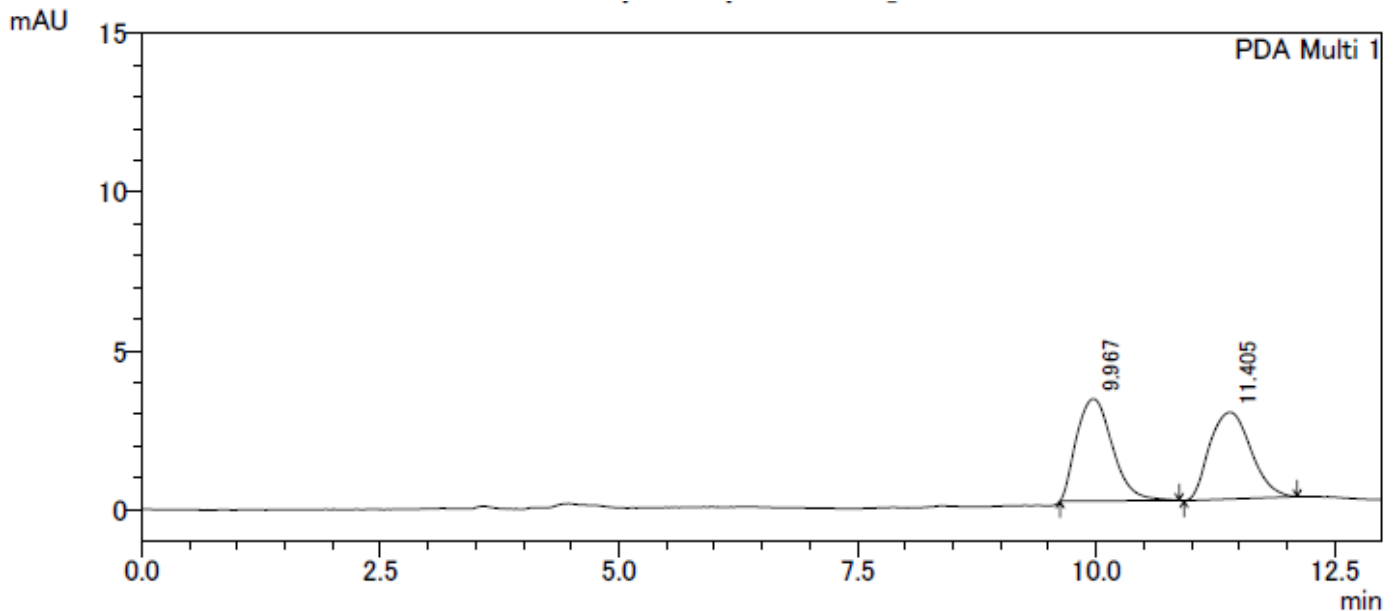

1 PDA Multi 1/254nm 4nm

ピークテーブル

PDA Ch1 254nm 4nm

| ピーク# | 保持時間   | 面積     | 高さ   | 面積%     | 高さ%     |
|------|--------|--------|------|---------|---------|
| 1    | 9.967  | 84534  | 3224 | 50.555  | 54.066  |
| 2    | 11.405 | 82680  | 2739 | 49.445  | 45.934  |
| 合計   |        | 167213 | 5962 | 100.000 | 100.000 |

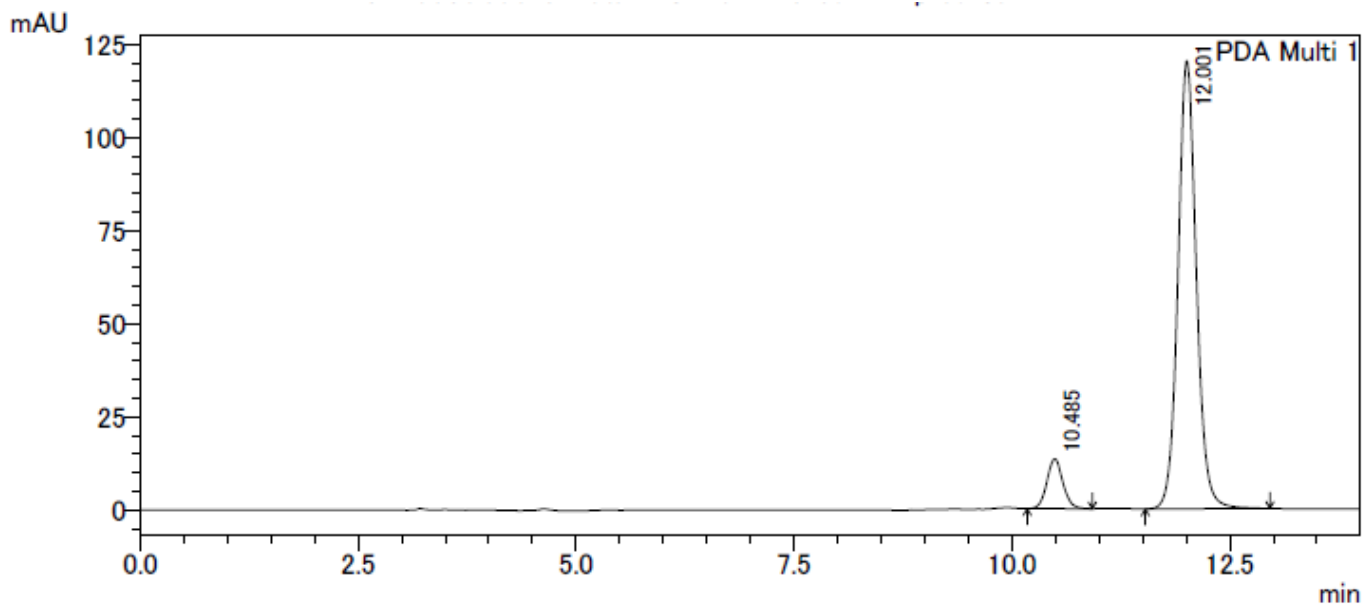

ピークテーブル

PDA Ch1 254nm 4nm

| ピーク# | 保持時間   | 面積      | 高さ     | 面積%     | 高さ%     |
|------|--------|---------|--------|---------|---------|
| 1    | 10.485 | 170961  | 13373  | 8.819   | 10.003  |
| 2    | 12.001 | 1767546 | 120307 | 91.181  | 89.997  |
| 合計   |        | 1938508 | 133680 | 100.000 | 100.000 |

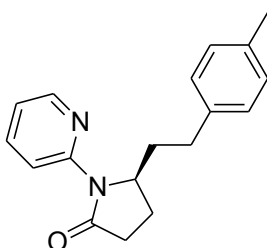

### 5-(4-Methylphenethyl)-1-(pyridin-2-yl)pyrrolidin-2-one (3b).

Isolated by preparative TLC (hexane/EtOAc = 2/1,  $R_f$  = 0.6). The title compound was obtained as white solid (56%). Mp 66 °C,  $^1\text{H}$  NMR  $\delta$  8.37-8.35 (m, 1H), 8.20-8.18 (m, 1H), 7.69-7.66 (m, 1H), 7.07-6.97 (m, 5H), 4.86-4.81 (m, 1H), 2.79-2.71 (m, 1H), 2.64-2.53 (m, 3H), 2.32-2.26 (m, 4H), 2.24-2.16 (m, 1H), 1.96-1.90 (m, 1H), 1.81-1.75 (m, 1H);  $^{13}\text{C}$  NMR  $\delta$  174.5, 150.9, 147.4, 138.0, 137.3, 135.1, 128.8, 127.8, 119.4, 116.3, 57.6, 34.4, 31.9, 30.9, 22.7, 20.7. HRMS(ESI) calcd for  $\text{C}_{18}\text{H}_{20}\text{N}_2\text{NaO}$  (M+Na): 303.1468; found: 303.1467.  $[\alpha]_D^{29} = +45.5$  ( $c$  1.40,  $\text{CHCl}_3$ , 84% ee). Ee was determined by HPLC analysis using a chiral column (Daicel Chiralpak IA: 4.6 x 250 mm, 254 nm UV detector, rt, eluent: hexane/2-propanol = 19/1, flow rate: 1.0 mL/min, retention time: 10.7 min for major isomer and 9.3 min for minor isomer).

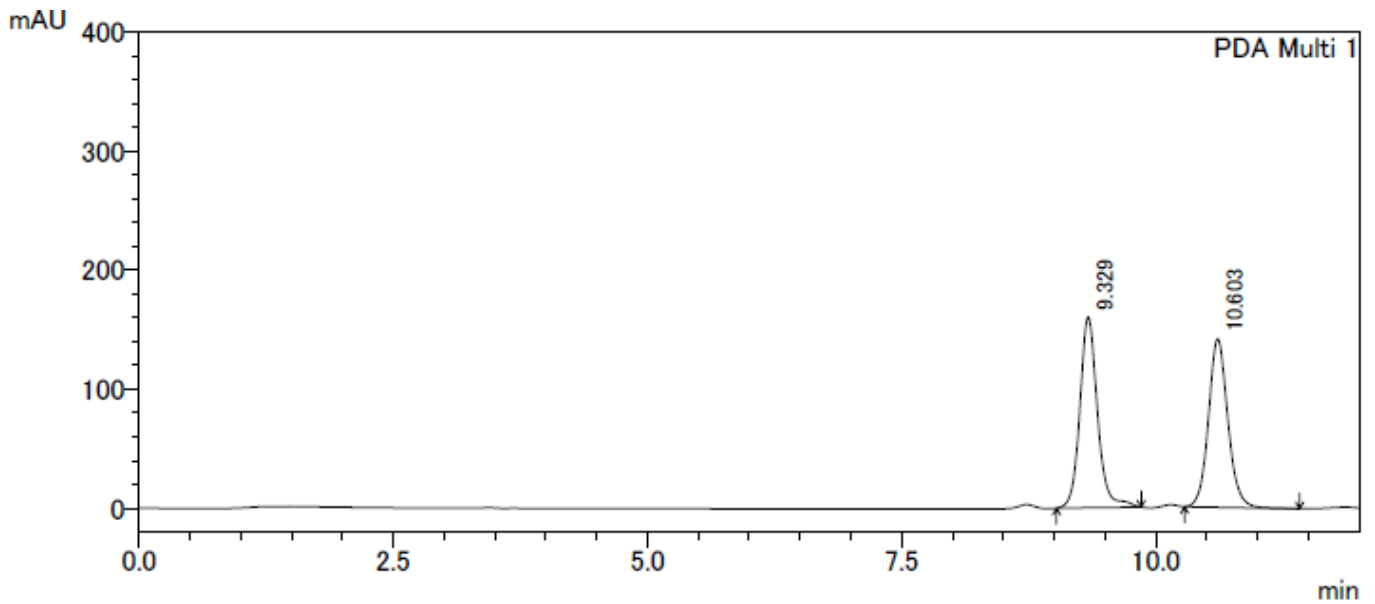

1 PDA Multi 1/254nm 4nm

ピークテーブル

PDA Ch1 254nm 4nm

| ピーク# | 保持時間   | 面積      | 高さ     | 面積%     | 高さ%     |
|------|--------|---------|--------|---------|---------|
| 1    | 9.329  | 1941835 | 160530 | 50.820  | 53.166  |
| 2    | 10.603 | 1879158 | 141412 | 49.180  | 46.834  |
| 合計   |        | 3820993 | 301942 | 100.000 | 100.000 |

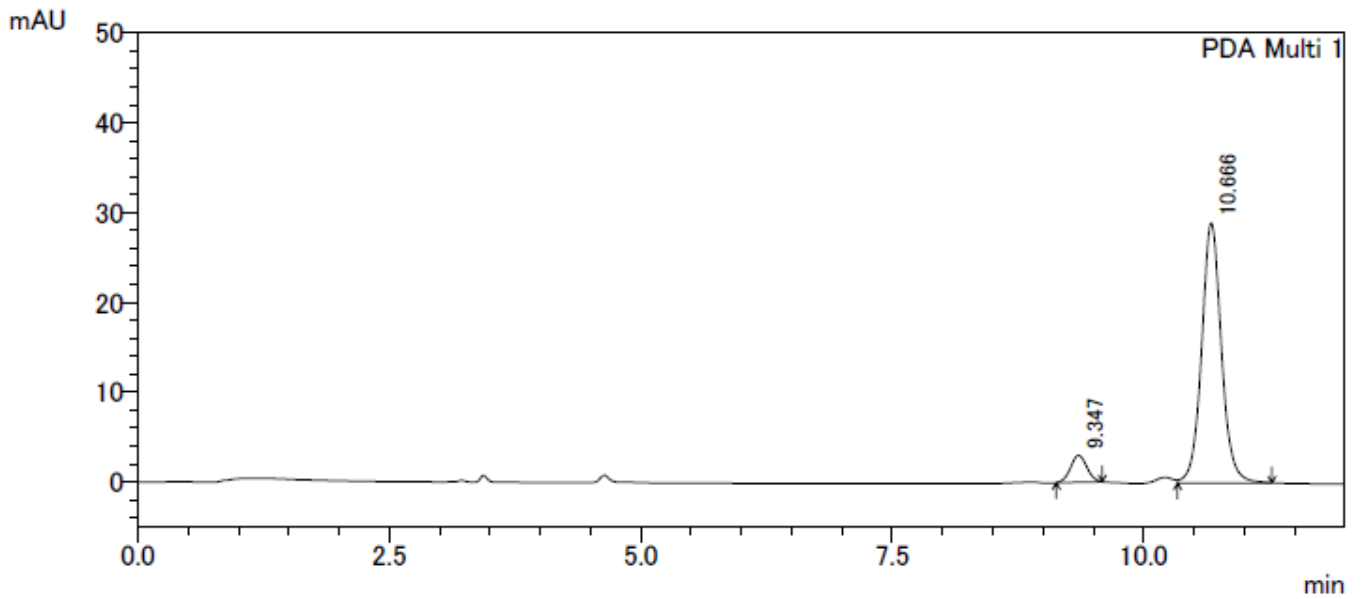

1 PDA Multi 1/254nm 4nm

ピークテーブル

PDA Ch1 254nm 4nm

| ピーク# | 保持時間   | 面積     | 高さ    | 面積%     | 高さ%     |
|------|--------|--------|-------|---------|---------|
| 1    | 9.347  | 33774  | 3001  | 7.828   | 9.388   |
| 2    | 10.666 | 397653 | 28965 | 92.172  | 90.612  |
| 合計   |        | 431427 | 31965 | 100.000 | 100.000 |

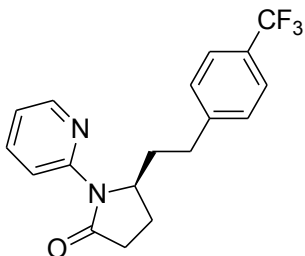

**1-(Pyridin-2-yl)-5-(4-(trifluoromethyl)phenethyl)pyrrolidin-2-one (3c).**

Isolated by twice preparative TLC (hexane/EtOAc = 2/1,  $R_f$  = 0.6). The title compound was obtained as yellow oil (87%).  $^1\text{H}$  NMR  $\delta$  8.35-8.34 (m, 1H), 8.22-8.20 (m, 1H), 7.70-7.66 (m, 1H), 7.52-7.50 (m, 2H), 7.28-7.26 (m, 2H), 7.04-7.02 (m, 1H), 4.87-4.82 (m, 1H), 2.81-2.72 (m, 3H), 2.62-2.55 (m, 1H), 2.34-2.21 (m, 2H), 1.97-1.92 (m, 1H), 1.88-1.80 (m, 1H);  $^{13}\text{C}$  NMR  $\delta$  174.6, 151.1, 147.6, 145.4, 137.6, 128.6, 128.3 (d,  $J_{\text{C-F}}$  = 32.2 Hz, 1C), 125.3 (q,  $J_{\text{C-F}}$  = 3.6 Hz, 1C), 119.7, 116.3, 57.6, 34.2, 32.1, 31.5, 22.9 (A pair of peaks at the aromatic region was overlapped). HRMS(ESI) calcd for  $\text{C}_{18}\text{H}_{17}\text{F}_3\text{N}_2\text{NaO}$  (M+Na): 357.1185; found: 357.1191.  $[\alpha]_D^{30}$  = +54.2 ( $c$  2.72,  $\text{CHCl}_3$ , 85% ee). Ee was determined by HPLC analysis using a chiral column (Daicel Chiralpak IA: 4.6 x 250 mm, 254 nm UV detector, rt, eluent: hexane/2-propanol = 19/1, flow rate: 1.0 mL/min, retention time: 13.0 min for major isomer and 12.1 min for minor isomer).

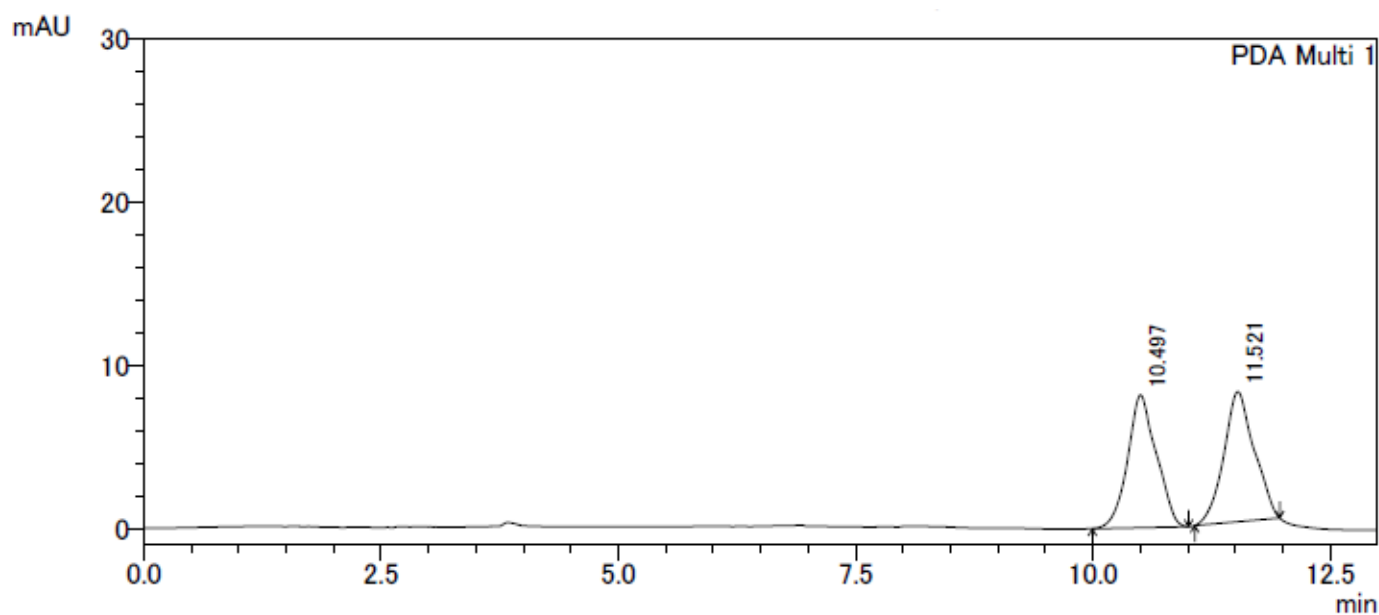

1 PDA Multi 1/254nm 4nm

ピークテーブル

PDA Ch1 254nm 4nm

| ピーク# | 保持時間   | 面積     | 高さ    | 面積%     | 高さ%     |
|------|--------|--------|-------|---------|---------|
| 1    | 10.497 | 172306 | 8148  | 49.164  | 50.522  |
| 2    | 11.521 | 178169 | 7980  | 50.836  | 49.478  |
| 合計   |        | 350475 | 16127 | 100.000 | 100.000 |



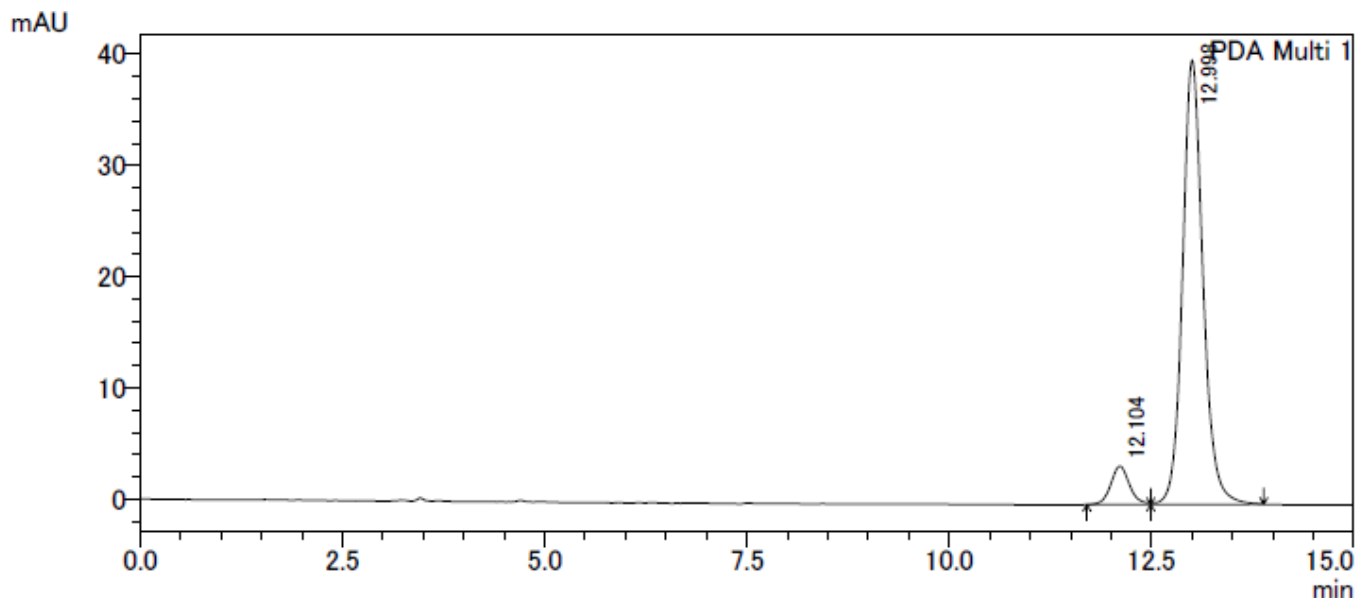

ピークテーブル

PDA Ch1 254nm 4nm

| ピーク# | 保持時間   | 面積     | 高さ    | 面積%     | 高さ%     |
|------|--------|--------|-------|---------|---------|
| 1    | 12.104 | 55763  | 3448  | 7.366   | 7.941   |
| 2    | 12.998 | 701214 | 39968 | 92.634  | 92.059  |
| 合計   |        | 756976 | 43416 | 100.000 | 100.000 |

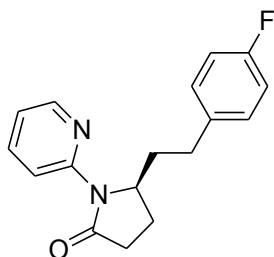

### 5-(4-Fluorophenethyl)-1-(pyridin-2-yl)pyrrolidin-2-one (3d).

Isolated by twice preparative TLC (hexane/EtOAc = 2/1,  $R_f$  = 0.6). The title compound was obtained as white solid (60%). Mp 64 °C,  $^1\text{H}$  NMR  $\delta$  8.36-8.35 (m, 1H), 8.22-8.20 (m, 1H), 7.70-7.66 (m, 1H), 7.12-7.09 (m, 2H), 7.04-7.01 (m, 1H), 6.96-6.91 (m, 2H), 4.85-4.80 (m, 1H), 2.80-2.71 (m, 1H), 2.66-2.53 (m, 3H), 2.33-2.16 (m, 2H), 1.96-1.89 (m, 1H), 1.83-1.73 (m, 1H);  $^{13}\text{C}$  NMR  $\delta$  174.7, 160.3, 151.2, 147.6, 137.6, 136.9 (d,  $J_{\text{C-F}}$  = 2.4 Hz, 1C), 129.5 (d,  $J_{\text{C-F}}$  = 7.2 Hz, 1C), 119.7, 116.4, 115.0 (d,  $J_{\text{C-F}}$  = 21.5 Hz, 1C) 57.7, 34.6, 32.1, 30.8, 22.9. HRMS(ESI) calcd for  $\text{C}_{17}\text{H}_{17}\text{FN}_2\text{NaO}$  (M+Na): 307.1217; found: 307.1217.  $[\alpha]_D^{30}$  = +60.7 ( $c$  1.30,  $\text{CHCl}_3$ , 83% ee). Ee was determined by HPLC analysis using a chiral column (Daicel Chiralpak IA: 4.6 x 250 mm, 254 nm UV detector, rt, eluent: hexane/2-propanol = 19/1, flow rate: 1.0 mL/min, retention time: 14.4 min for major isomer and 12.9 min for minor isomer).

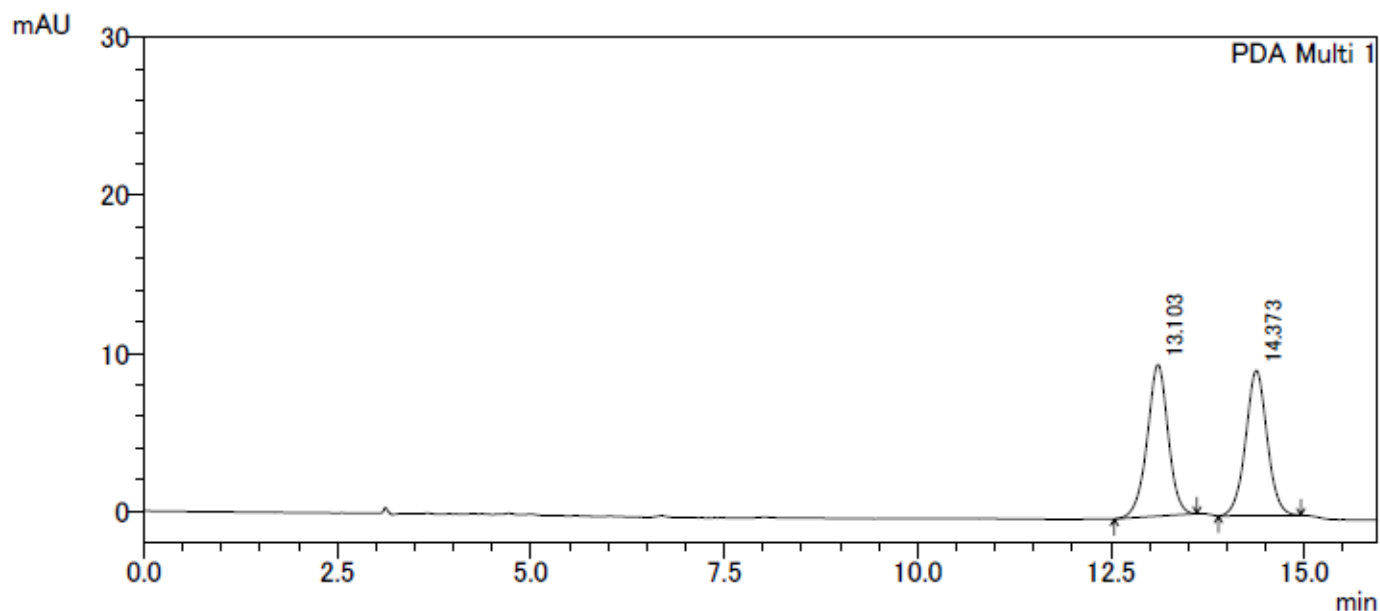

1 PDA Multi 1/254nm 4nm

ピークテーブル

PDA Ch1 254nm 4nm

| ピーク# | 保持時間   | 面積     | 高さ    | 面積%     | 高さ%     |
|------|--------|--------|-------|---------|---------|
| 1    | 13.103 | 181826 | 9616  | 50.438  | 51.081  |
| 2    | 14.373 | 178672 | 9209  | 49.562  | 48.919  |
| 合計   |        | 360498 | 18825 | 100.000 | 100.000 |

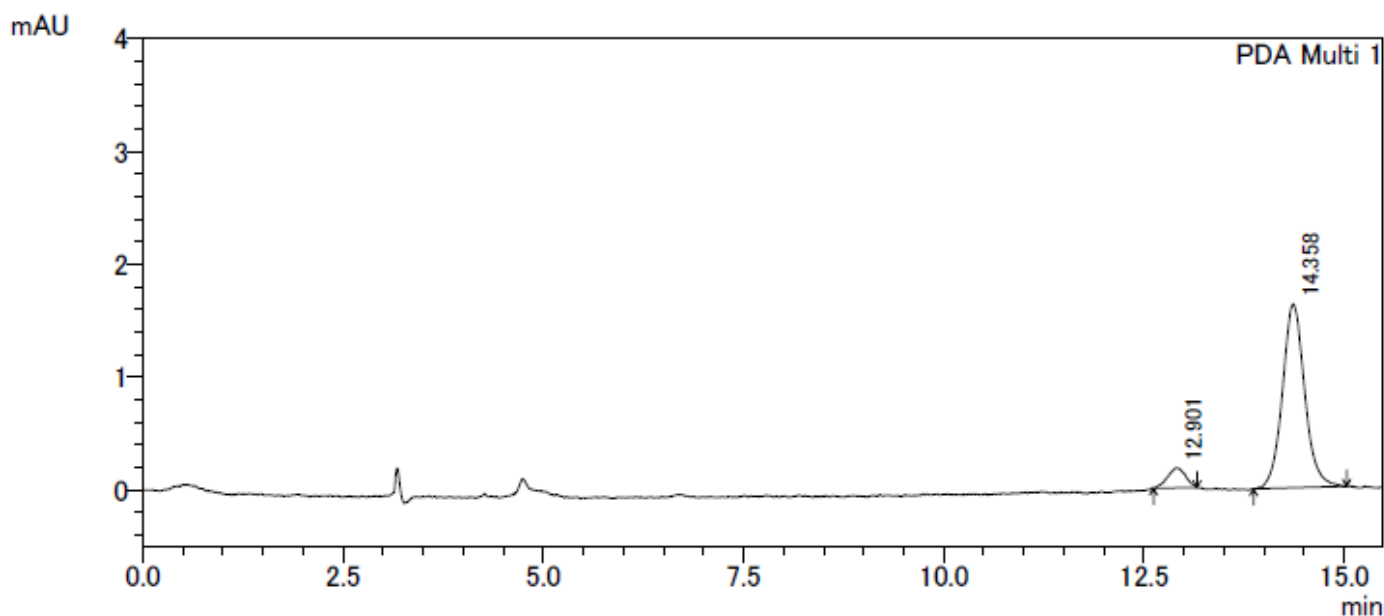

1 PDA Multi 1/254nm 4nm

ピークテーブル

PDA Ch1 254nm 4nm

| ピーク# | 保持時間   | 面積    | 高さ   | 面積%     | 高さ%     |
|------|--------|-------|------|---------|---------|
| 1    | 12.901 | 2764  | 178  | 8.072   | 9.841   |
| 2    | 14.358 | 31477 | 1627 | 91.928  | 90.159  |
| 合計   |        | 34241 | 1805 | 100.000 | 100.000 |

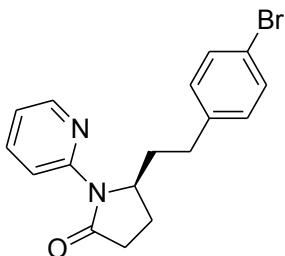

**5-(4-Bromophenethyl)-1-(pyridin-2-yl)pyrrolidin-2-one (3e).**

Isolated by twice preparative TLC (After hexane/EtOAc = 3/1, R<sub>f</sub> = 0.6, EtOAc only, R<sub>f</sub> = 0.7). The title compound was obtained as yellow oil (50%). <sup>1</sup>H NMR δ 8.35-8.34 (m, 1H), 8.21-8.20 (m, 1H), 7.69-7.66 (m, 1H), 7.37-7.35 (m, 2H), 7.03-7.01 (m, 3H), 4.84-4.79 (m, 1H), 2.79-2.71 (m, 1H), 2.64-2.53 (m, 3H), 2.32-2.16 (m, 2H), 1.95-1.89 (m, 1H), 1.82-1.74 (m, 1H); <sup>13</sup>C NMR δ 174.6, 151.1, 147.5, 140.2, 137.6, 131.4, 130.0, 119.6, 116.3, 57.6, 34.3, 32.1, 31.0, 22.9 (A pair of peaks at the aromatic region was overlapped). HRMS(ESI) calcd for C<sub>17</sub>H<sub>17</sub>BrN<sub>2</sub>NaO (M+Na): 367.0421; found: 367.0416. [α]<sub>D</sub><sup>25</sup> = +48.6 (c 1.39, CHCl<sub>3</sub>, 84% ee). Ee was determined by HPLC analysis using a chiral column (Daicel Chiralpak IA: 4.6 x 250 mm, 254 nm UV detector, rt, eluent: hexane/2-propanol = 19/1, flow rate: 1.0 mL/min, retention time: 14.9 min for major isomer and 13.3 min for minor isomer).

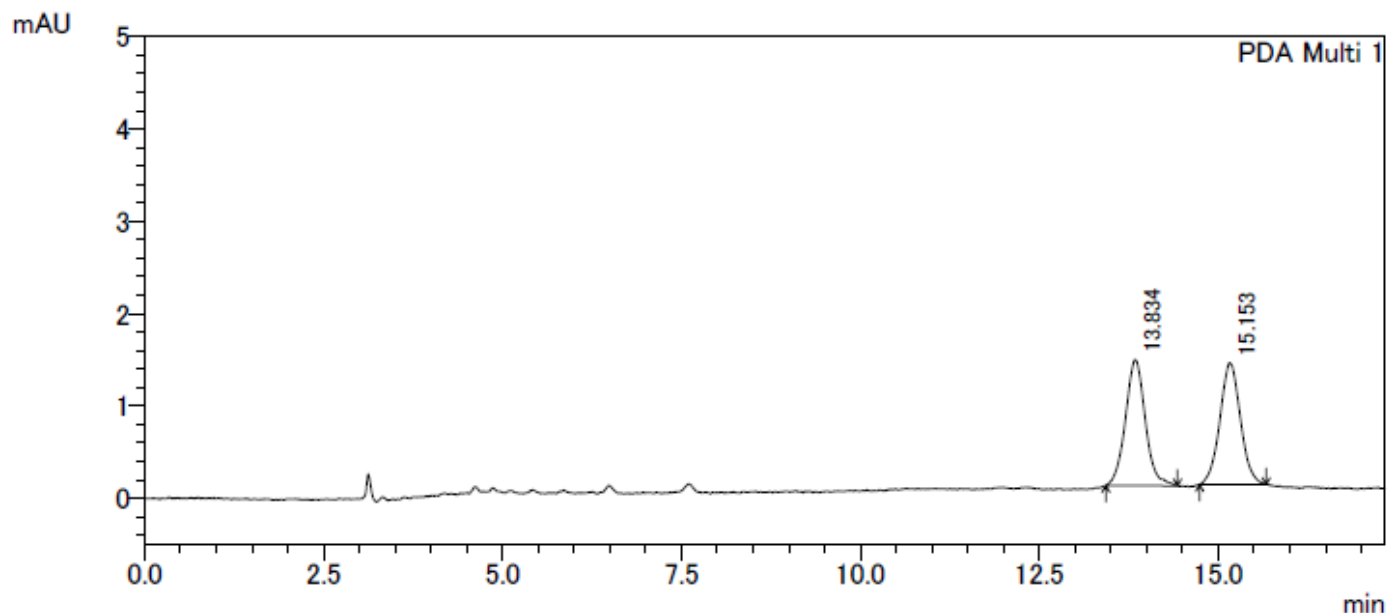

1 PDA Multi 1/254nm 4nm

ピークテーブル

PDA Ch1 254nm 4nm

| ピーク# | 保持時間   | 面積    | 高さ   | 面積%     | 高さ%     |
|------|--------|-------|------|---------|---------|
| 1    | 13.834 | 26316 | 1365 | 49.924  | 50.855  |
| 2    | 15.153 | 26396 | 1319 | 50.076  | 49.145  |
| 合計   |        | 52711 | 2684 | 100.000 | 100.000 |

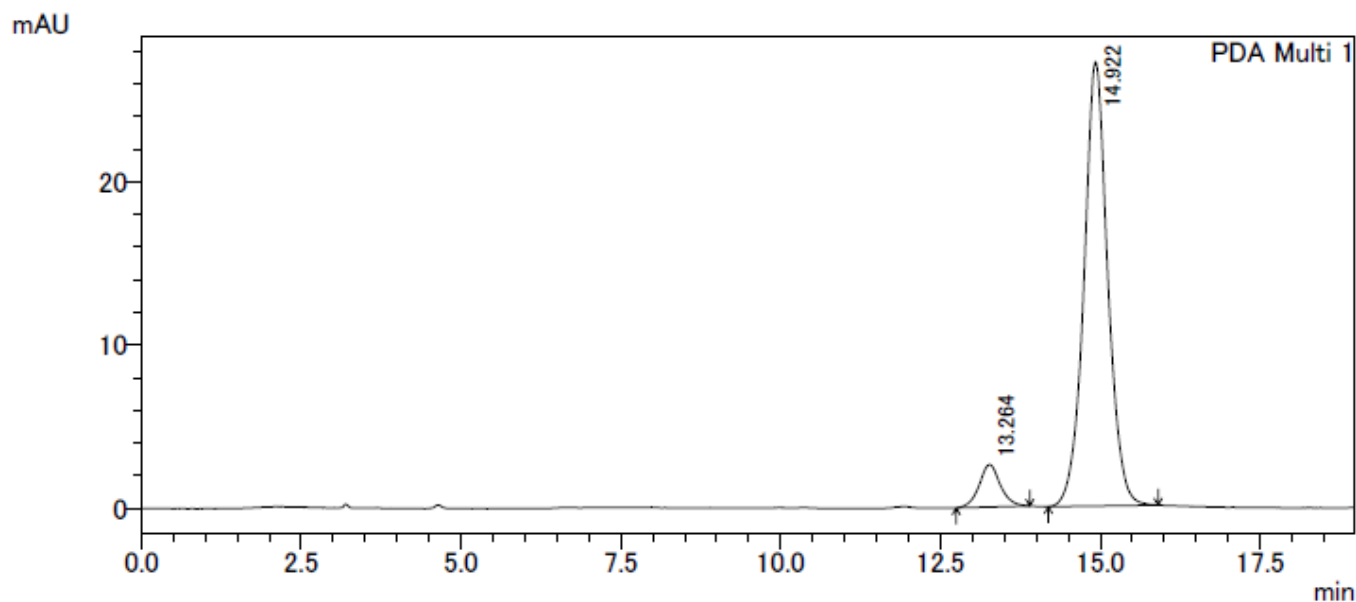

1 PDA Multi 1/254nm 4nm

ピークテーブル

PDA Ch1 254nm 4nm

| ピーク# | 保持時間   | 面積     | 高さ    | 面積%     | 高さ%     |
|------|--------|--------|-------|---------|---------|
| 1    | 13.264 | 59778  | 2595  | 7.820   | 8.718   |
| 2    | 14.922 | 704668 | 27172 | 92.180  | 91.282  |
| 合計   |        | 764446 | 29767 | 100.000 | 100.000 |

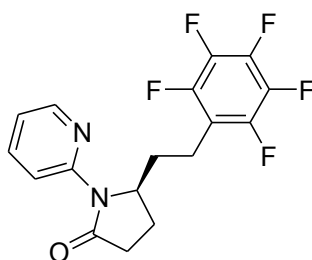

### 5-(2-(Pentafluorophenyl)ethyl)-1-(pyridin-2-yl)pyrrolidin-2-one (3f).

Isolated by preparative TLC (hexane/EtOAc = 2/1,  $R_f$  = 0.7). The title compound was obtained as white solid (69%). Mp 94 °C,  $^1\text{H}$  NMR  $\delta$  8.29-8.28 (m, 1H), 8.23-8.21 (m, 1H), 7.70-7.66 (m, 1H), 7.04-7.01 (m, 1H), 4.79-4.74 (m, 1H), 2.82-2.71 (m, 3H), 2.64-2.57 (m, 1H), 2.38-2.30 (m, 1H), 2.20-2.14 (m, 1H), 2.01-1.96 (m, 1H), 1.84-1.77 (m, 1H);  $^{13}\text{C}$  NMR  $\delta$  174.5, 150.9, 147.5, 146.0, 144.0, 137.6, 136.4, 119.7, 116.0, 114.2, 57.1, 32.1, 32.0, 22.6, 18.4. HRMS(ESI) calcd for  $\text{C}_{17}\text{H}_{13}\text{F}_5\text{N}_2\text{NaO}$  ( $\text{M}+\text{Na}$ ): 379.0840; found: 379.0841.  $[\alpha]_D^{28} = +58.7$  ( $c$  2.28,  $\text{CHCl}_3$ , 94% ee). Ee was determined by HPLC analysis using a chiral column (Daicel Chiralpak IA: 4.6 x 250 mm, 254 nm UV detector, rt, eluent: hexane/2-propanol = 19/1, flow rate: 1.0 mL/min, retention time: 11.1 min for major isomer and 10.0 min for minor isomer).

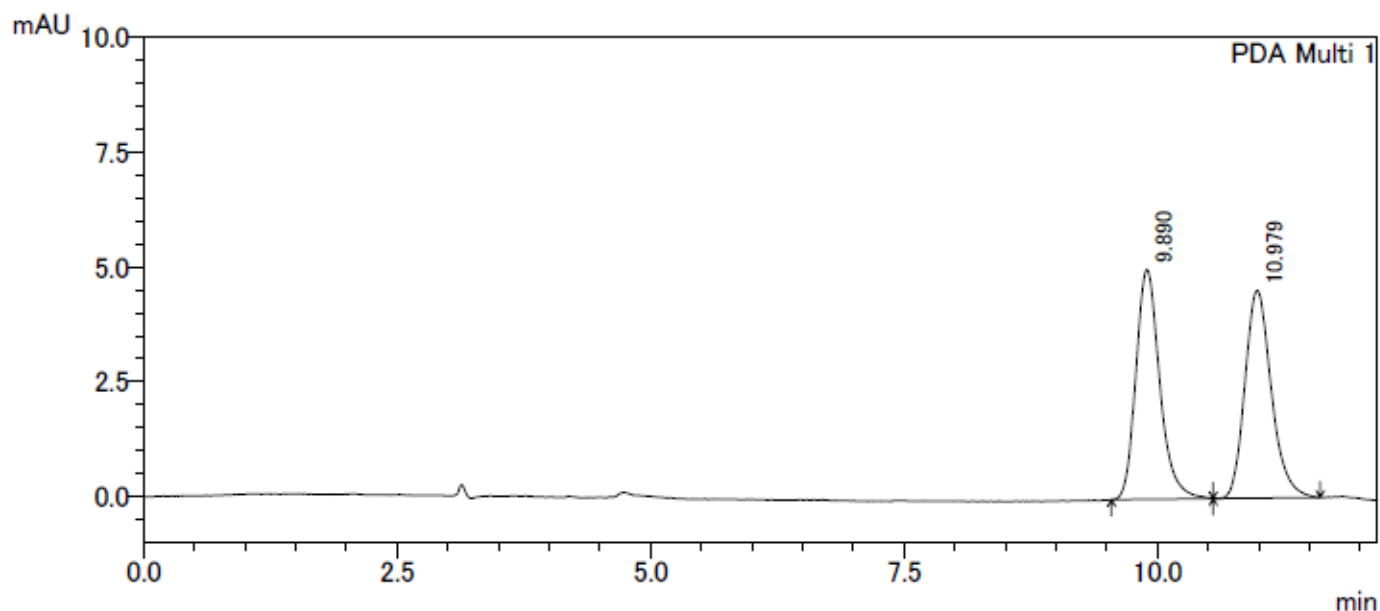

1 PDA Multi 1/254nm 4nm

ピークテーブル

PDA Ch1 254nm 4nm

| ピーク# | 保持時間   | 面積     | 高さ   | 面積%     | 高さ%     |
|------|--------|--------|------|---------|---------|
| 1    | 9.890  | 82008  | 5007 | 49.938  | 52.513  |
| 2    | 10.979 | 82211  | 4528 | 50.062  | 47.487  |
| 合計   |        | 164218 | 9534 | 100.000 | 100.000 |

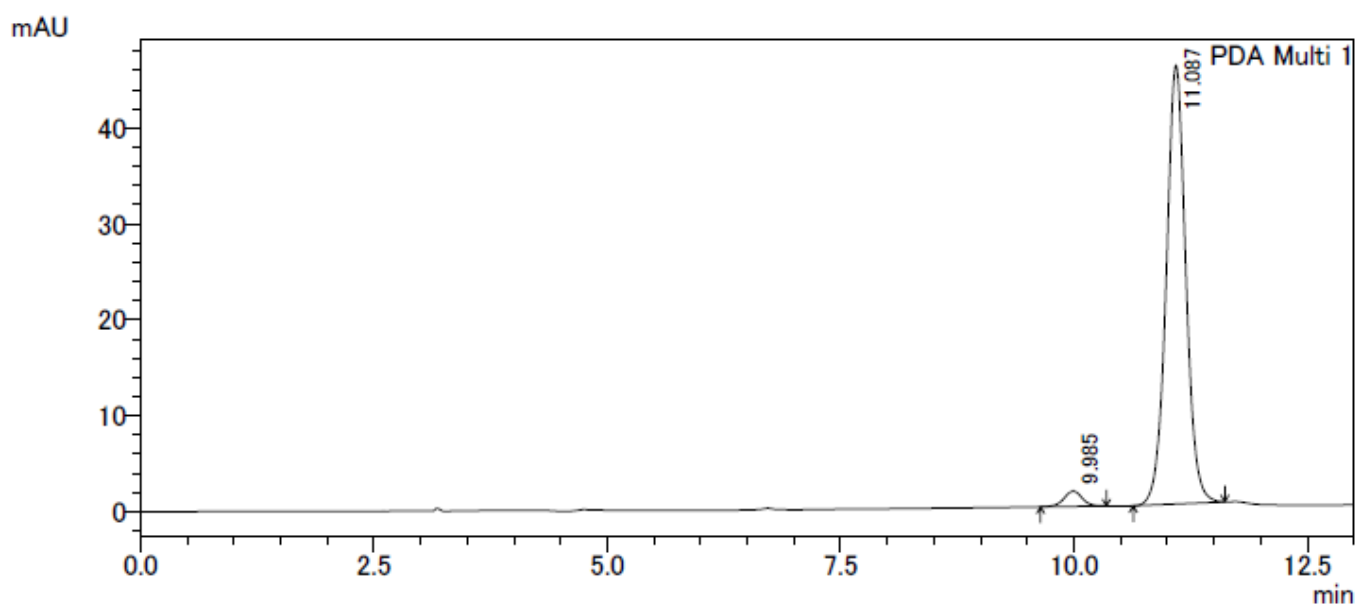

1 PDA Multi 1/254nm 4nm

ピークテーブル

PDA Ch1 254nm 4nm

| ピーク# | 保持時間   | 面積     | 高さ    | 面積%     | 高さ%     |
|------|--------|--------|-------|---------|---------|
| 1    | 9.985  | 21953  | 1640  | 3.185   | 3.459   |
| 2    | 11.087 | 667278 | 45779 | 96.815  | 96.541  |
| 合計   |        | 689232 | 47419 | 100.000 | 100.000 |

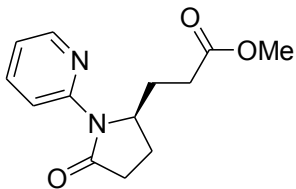

**Methyl 3-(5-oxo-1-(pyridin-2-yl)pyrrolidin-2-yl)propanoate (3g).**

Isolated by preparative TLC (hexane/EtOAc = 1/1, R<sub>f</sub> = 0.3). The title compound was obtained as yellow oil (82%). <sup>1</sup>H NMR δ 8.36-8.34 (m, 1H), 8.24-8.22 (m, 1H), 7.70-7.67 (m, 1H), 7.04-7.02 (m, 1H), 4.86-4.82 (m, 1H), 3.65 (s, 3H), 2.79-2.72 (m, 1H), 2.58-2.52 (m, 1H), 2.42-2.15 (m, 4H), 1.93-1.83 (m, 2H); <sup>13</sup>C NMR δ 174.7, 173.4, 151.2, 147.7, 137.7, 119.8, 116.3, 57.2, 51.8, 32.1, 30.3, 28.5, 23.0. HRMS(ESI) calcd for C<sub>13</sub>H<sub>16</sub>N<sub>2</sub>NaO<sub>3</sub> (M+Na): 271.1053; found: 271.1053. [α]<sub>D</sub><sup>24</sup> = +55.9 (c 1.70, CHCl<sub>3</sub>, 91% ee). Ee was determined by HPLC analysis using a chiral column (Daicel Chiralpak IA: 4.6 x 250 mm, 254 nm UV detector, rt, eluent: hexane/2-propanol = 19/1, flow rate: 1.0 mL/min, retention time: 23.9 min for major isomer and 19.1 min for minor isomer).

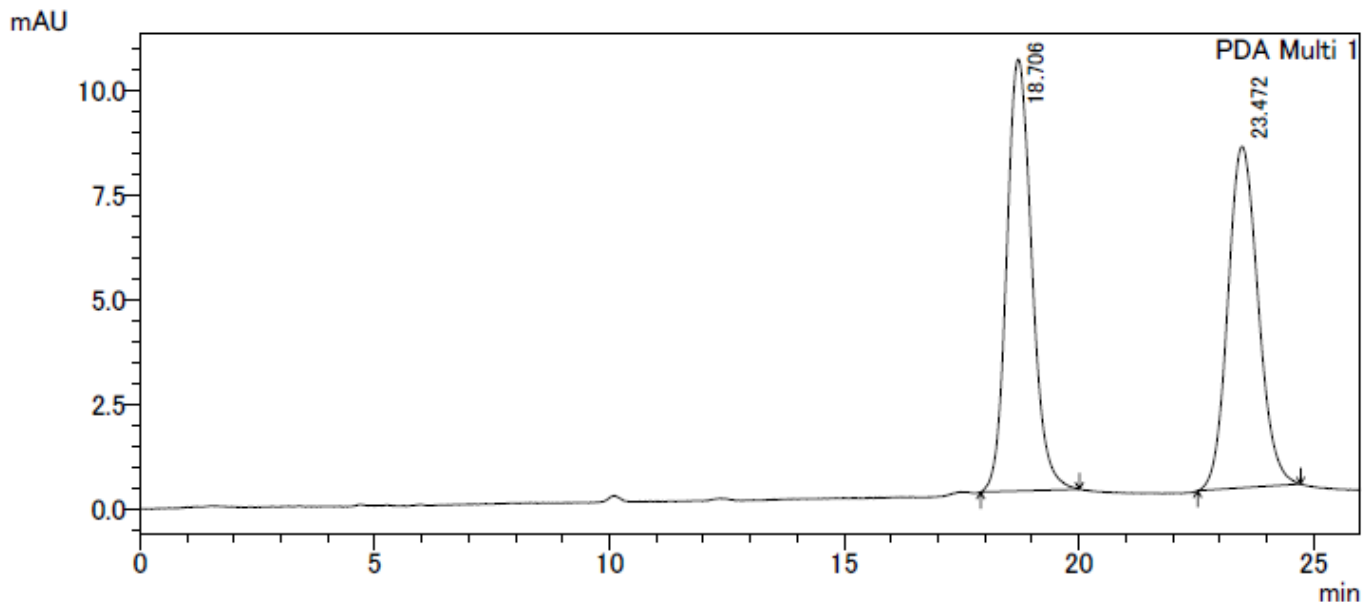

1 PDA Multi 1/254nm 4nm

ピークテーブル

PDA Ch1 254nm 4nm

| ピーク# | 保持時間   | 面積     | 高さ    | 面積%     | 高さ%     |
|------|--------|--------|-------|---------|---------|
| 1    | 18.706 | 384826 | 10338 | 51.195  | 55.850  |
| 2    | 23.472 | 366867 | 8172  | 48.805  | 44.150  |
| 合計   |        | 751693 | 18510 | 100.000 | 100.000 |

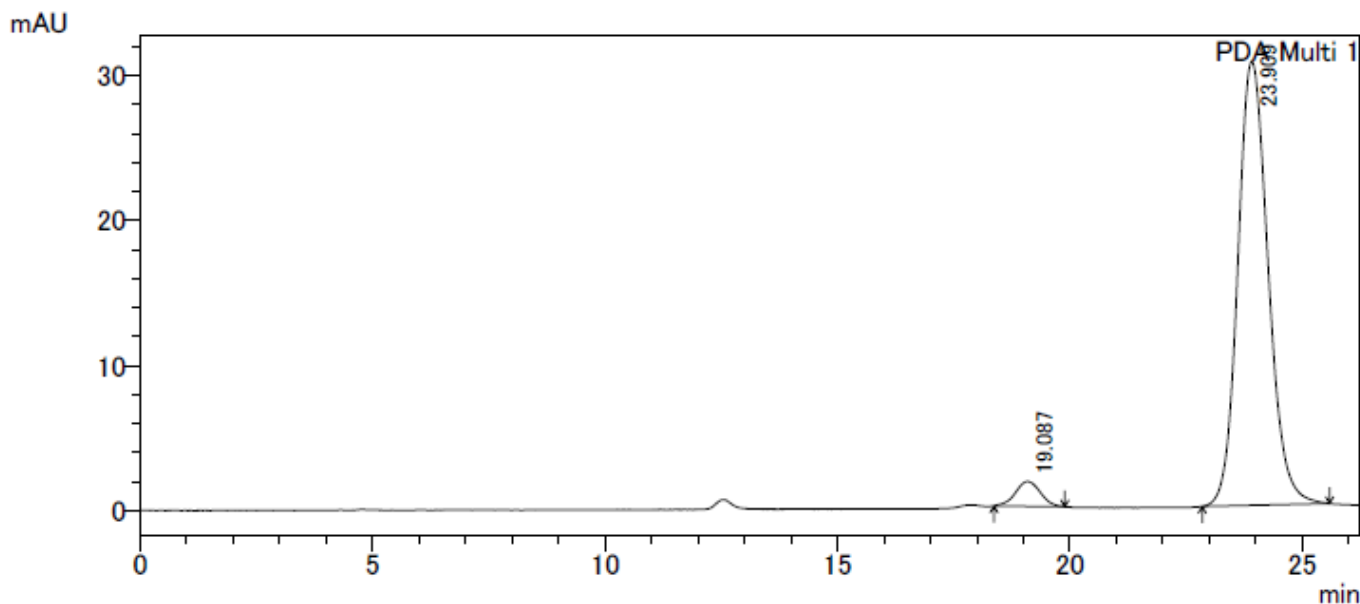

ピークテーブル

| PDA Ch1 254nm 4nm |        |         |       |         |         |
|-------------------|--------|---------|-------|---------|---------|
| ピーク#              | 保持時間   | 面積      | 高さ    | 面積%     | 高さ%     |
| 1                 | 19.087 | 64340   | 1731  | 4.430   | 5.345   |
| 2                 | 23.909 | 1387919 | 30660 | 95.570  | 94.655  |
| 合計                |        | 1452259 | 32392 | 100.000 | 100.000 |

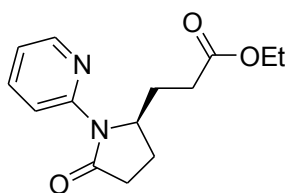

**Ethyl 3-(5-oxo-1-(pyridin-2-yl)pyrrolidin-2-yl)propanoate (3h).**

Isolated by preparative TLC (hexane/EtOAc = 2/1,  $R_f$  = 0.3). The title compound was obtained as yellow oil (87%).  $^1\text{H}$  NMR  $\delta$  8.36-8.35 (m, 1H), 8.24-8.22 (m, 1H), 7.71-7.67 (m, 1H), 7.04-7.02 (m, 1H), 4.87-4.83 (m, 1H), 4.13-4.09 (m, 2H), 2.79-2.72 (m, 1H), 2.59-2.52 (m, 1H), 2.39-2.16 (m, 4H), 1.92-1.85 (m, 2H), 1.26-1.22 (m, 3H);  $^{13}\text{C}$  NMR  $\delta$  174.8, 173.1, 151.3, 147.8, 137.8, 119.9, 116.4, 60.7, 57.3, 32.2, 30.7, 28.6, 23.0, 14.3. HRMS(ESI) calcd for  $\text{C}_{14}\text{H}_{18}\text{N}_2\text{NaO}_3$  ( $\text{M}+\text{Na}$ ): 285.1210; found: 285.1208.  $[\alpha]_D^{27} = +63.4$  ( $c$  1.87,  $\text{CHCl}_3$ , 91% ee). Ee was determined by HPLC analysis using a chiral column (Daicel Chiralpak IA: 4.6 x 250 mm, 254 nm UV detector, rt, eluent: hexane/2-propanol = 19/1, flow rate: 1.0 mL/min, retention time: 18.4 min for major isomer and 15.7 min for minor isomer).

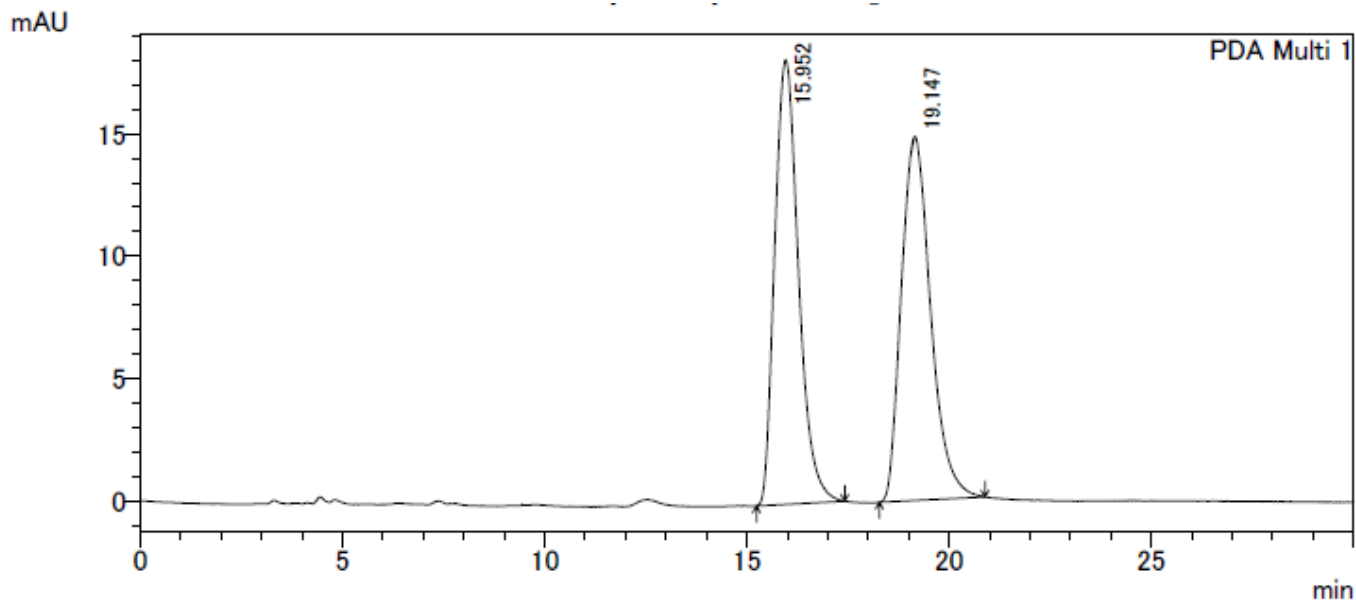

1 PDA Multi 1/254nm 4nm

ピークテーブル

PDA Ch1 254nm 4nm

| ピーク# | 保持時間   | 面積      | 高さ    | 面積%     | 高さ%     |
|------|--------|---------|-------|---------|---------|
| 1    | 15.952 | 742951  | 18158 | 49.821  | 54.996  |
| 2    | 19.147 | 748296  | 14859 | 50.179  | 45.004  |
| 合計   |        | 1491247 | 33018 | 100.000 | 100.000 |

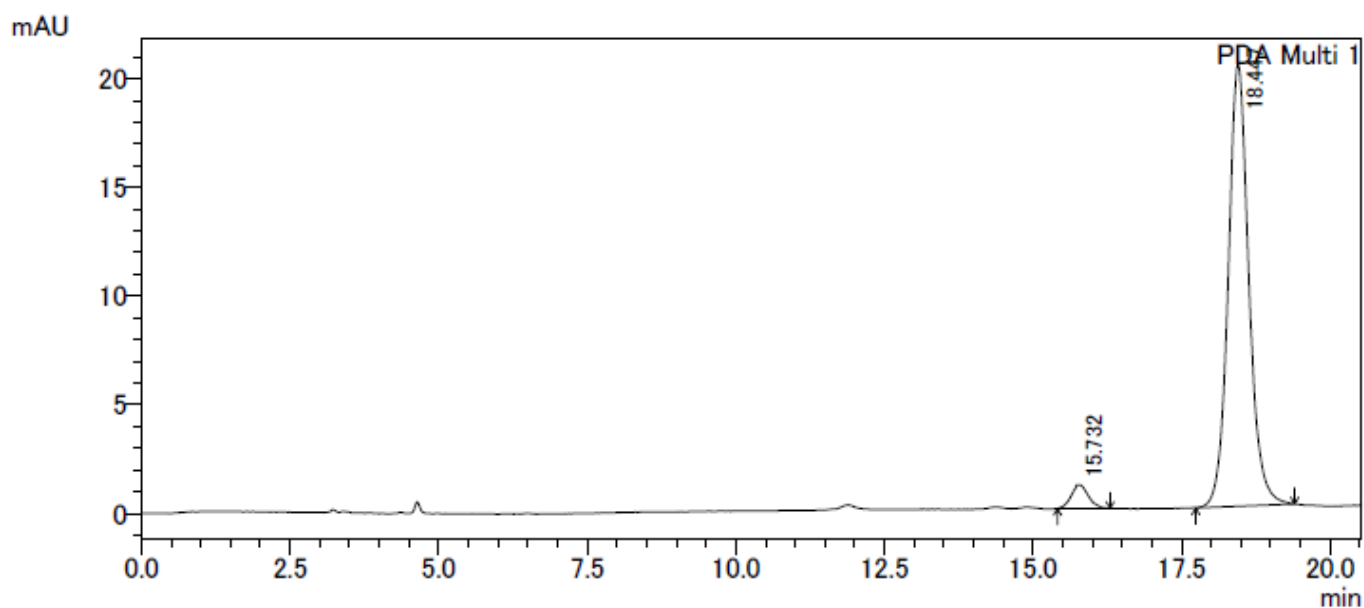

1 PDA Multi 1/254nm 4nm

ピークテーブル

PDA Ch1 254nm 4nm

| ピーク# | 保持時間   | 面積     | 高さ    | 面積%     | 高さ%     |
|------|--------|--------|-------|---------|---------|
| 1    | 15.732 | 21688  | 1081  | 4.235   | 5.047   |
| 2    | 18.447 | 490412 | 20343 | 95.765  | 94.953  |
| 合計   |        | 512100 | 21425 | 100.000 | 100.000 |



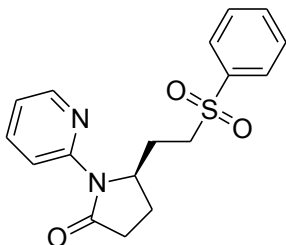

**5-(2-(Phenylsulfonyl)ethyl)-1-(pyridin-2-yl)pyrrolidin-2-one (3i).**

Isolated by preparative TLC (hexane/EtOAc = 1/2, R<sub>f</sub> = 0.5). The title compound was obtained as yellow oil (70%). <sup>1</sup>H NMR δ 8.22-8.18 (m, 2H), 7.87-7.85 (m, 2H), 7.68-7.62 (m, 2H), 7.55-7.52 (m, 2H), 7.02-6.99 (m, 1H), 4.83-4.80 (m, 1H), 3.21-3.07 (m, 2H), 2.72-2.65 (m, 1H), 2.57-2.51 (m, 1H), 2.32-2.22 (m, 2H), 2.03-1.96 (m, 1H), 1.83-1.77 (m, 1H); <sup>13</sup>C NMR δ 174.3, 150.6, 147.4, 138.6, 137.7, 133.7, 129.2, 128.0, 119.8, 115.9, 56.1, 52.6, 31.7, 26.5, 22.8. HRMS(ESI) calcd for C<sub>17</sub>H<sub>18</sub>N<sub>2</sub>NaO<sub>3</sub>S (M+Na): 353.0930; found: 353.0926. [α]<sub>D</sub><sup>29</sup> = +53.4 (c 1.96, CHCl<sub>3</sub>, 82% ee). Ee was determined by HPLC analysis using a chiral column (Daicel Chiralpak IC: 4.6 x 250 mm, 254 nm UV detector, rt, eluent: hexane/DCM = 1/1, flow rate: 4.0 mL/min, retention time: 12.7 min for major isomer and 9.8 min for minor isomer).

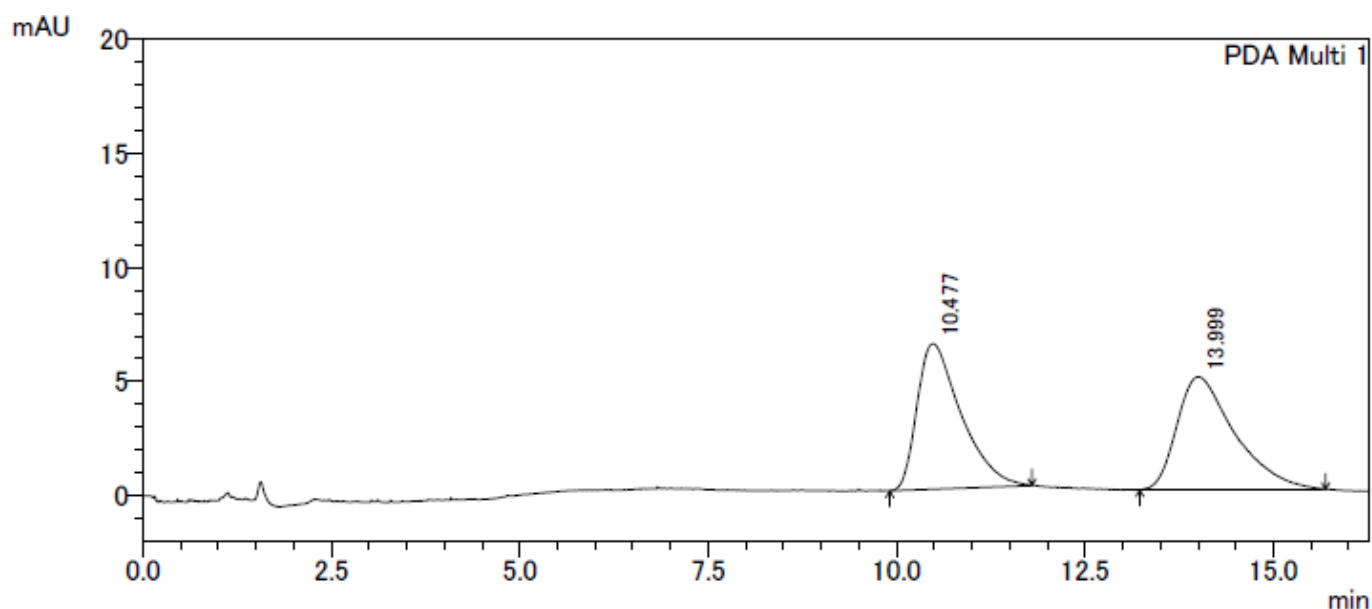

1 PDA Multi 1/254nm 4nm

ピークテーブル

PDA Ch1 254nm 4nm

| ピーク# | 保持時間   | 面積     | 高さ    | 面積%     | 高さ%     |
|------|--------|--------|-------|---------|---------|
| 1    | 10.477 | 259231 | 6377  | 49.589  | 56.303  |
| 2    | 13.999 | 263527 | 4949  | 50.411  | 43.697  |
| 合計   |        | 522758 | 11326 | 100.000 | 100.000 |

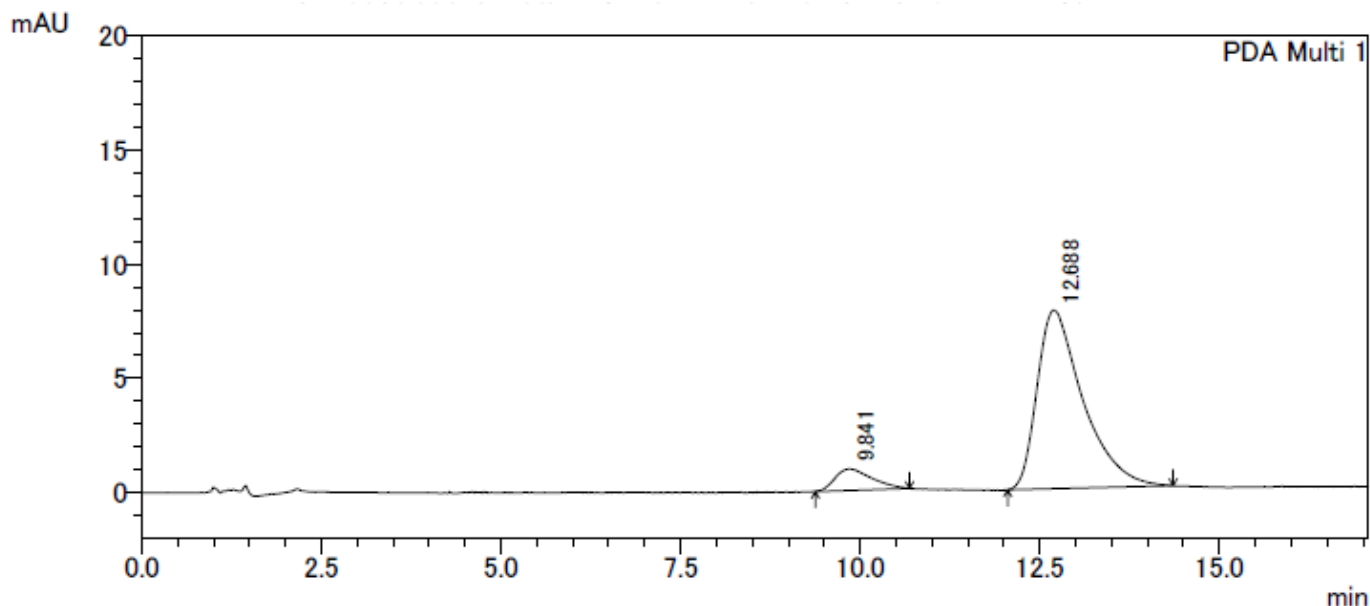

1 PDA Multi 1/254nm 4nm

ピークテーブル

PDA Ch1 254nm 4nm

| ピーク# | 保持時間   | 面積     | 高さ   | 面積%     | 高さ%     |
|------|--------|--------|------|---------|---------|
| 1    | 9.841  | 33758  | 956  | 8.842   | 10.891  |
| 2    | 12.688 | 348047 | 7821 | 91.158  | 89.109  |
| 合計   |        | 381805 | 8777 | 100.000 | 100.000 |

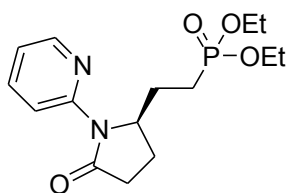

### Diethyl 2-(5-oxo-1-(pyridin-2-yl)pyrrolidin-2-yl)ethylphosphonate (3j).

Isolated by preparative TLC (MeOH/EtOAc = 1/9,  $R_f$  = 0.4). The title compound was obtained as yellow oil (65%).  $^1\text{H}$  NMR  $\delta$  8.36-8.34 (m, 1H), 8.23-8.22 (m, 1H), 7.72-7.68 (m, 1H), 7.06-7.03 (m, 1H), 4.85-4.80 (m, 1H), 4.12-3.96 (m, 4H), 2.78-2.70 (m, 1H), 2.60-2.54 (m, 1H), 2.32-2.24 (m, 1H), 2.19-2.13 (m, 1H), 1.91-1.69 (m, 4H), 1.30-1.26 (q,  $J$  = 7.2 Hz, 6H);  $^{13}\text{C}$  NMR  $\delta$  174.5, 150.9, 147.5, 137.6, 119.7, 116.2, 61.6, 61.5, 57.8, 57.7, 31.9, 25.9, 25.8, 22.3, 22.1, 20.9, 16.3, 16.3, 16.3, 16.3. HRMS(ESI) calcd for  $\text{C}_{15}\text{H}_{23}\text{N}_2\text{NaO}_4\text{P}$  ( $\text{M}+\text{Na}$ ): 349.1288; found: 349.1291.  $[\alpha]_D^{30}$  = +32.2 ( $c$  1.65,  $\text{CHCl}_3$ , 76% ee). Ee was determined by HPLC analysis using a chiral column (Daicel Chiralpak IA: 4.6 x 250 mm, 254 nm UV detector, rt, eluent: hexane/2-propanol = 1/1, flow rate: 0.5 mL/min, retention time: 13.4 min for major isomer and 11.9 min for minor isomer).

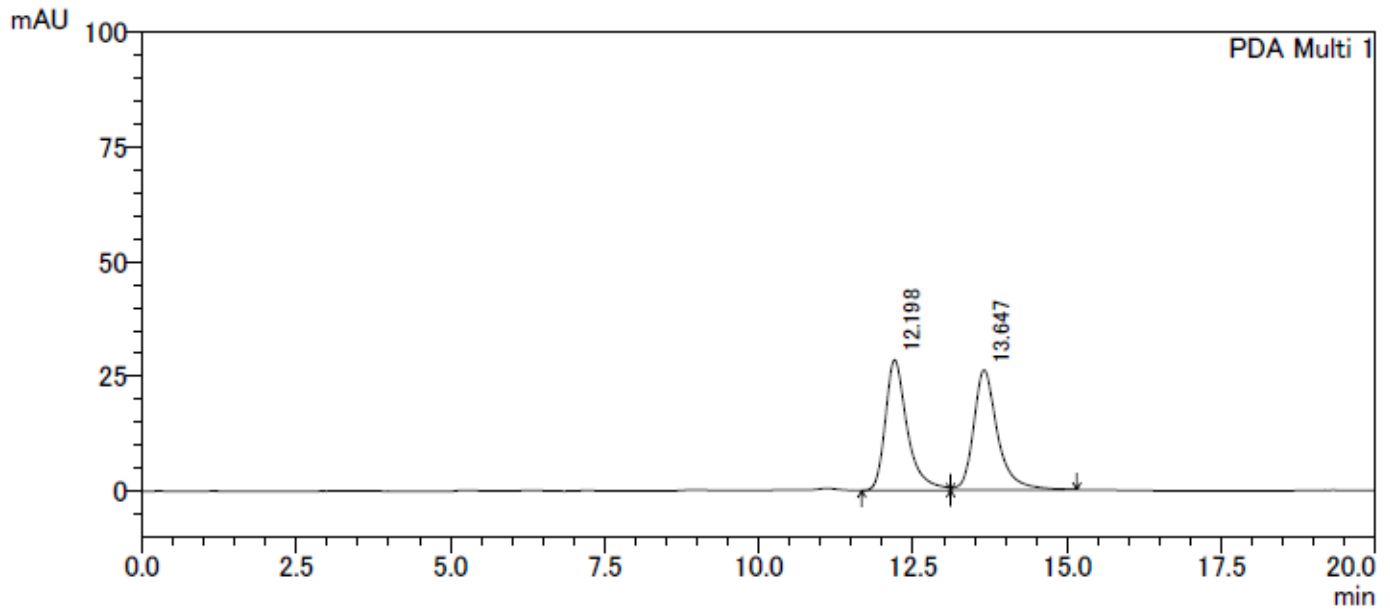

1 PDA Multi 1/254nm 4nm

ピークテーブル

PDA Ch1 254nm 4nm

| ピーク# | 保持時間   | 面積      | 高さ    | 面積%     | 高さ%     |
|------|--------|---------|-------|---------|---------|
| 1    | 12.198 | 705358  | 28467 | 49.844  | 52.082  |
| 2    | 13.647 | 709775  | 26191 | 50.156  | 47.918  |
| 合計   |        | 1415132 | 54658 | 100.000 | 100.000 |

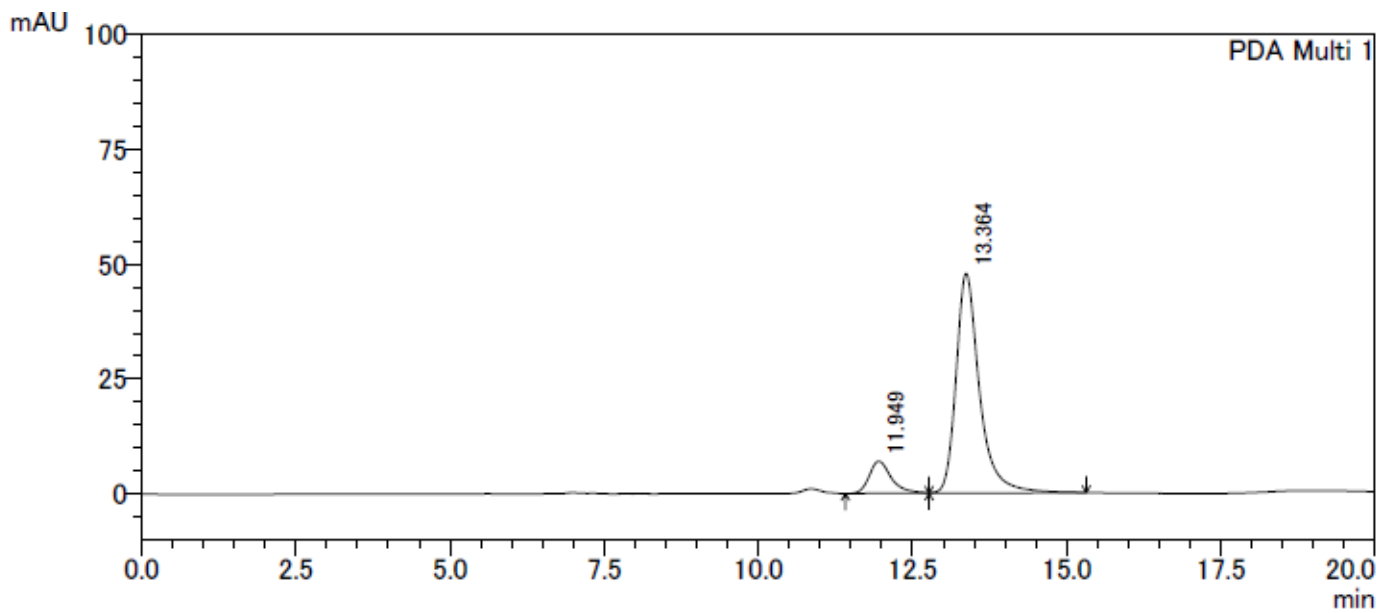

1 PDA Multi 1/254nm 4nm

ピークテーブル

PDA Ch1 254nm 4nm

| ピーク# | 保持時間   | 面積      | 高さ    | 面積%     | 高さ%     |
|------|--------|---------|-------|---------|---------|
| 1    | 11.949 | 174690  | 6998  | 12.117  | 12.762  |
| 2    | 13.364 | 1267011 | 47836 | 87.883  | 87.238  |
| 合計   |        | 1441701 | 54834 | 100.000 | 100.000 |

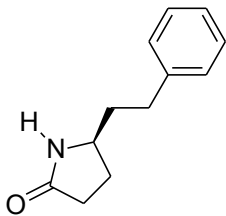

**(S)-5-Phenethylpyrrolidin-2-one (4a).**

The title compound was obtained as white solid (86%). Mp 66 °C,  $^1\text{H NMR}$   $\delta$  7.31-7.17 (m, 5H, overlap with  $\text{CHCl}_3$ ), 6.49 (br, 1H), 3.68-3.62 (m, 1H), 2.69-2.65 (m, 2H), 2.39-2.23 (m, 3H), 1.91-1.71 (m, 3H);  $^{13}\text{C NMR}$   $\delta$  178.3, 141.0, 128.6, 128.3, 126.2, 54.0, 38.4, 32.3, 30.1, 27.4. HRMS(ESI) calcd for  $\text{C}_{12}\text{H}_{15}\text{NNaO}$  (M+Na): 212.1046; found: 212.1046.  $[\alpha]_D^{21} = -22.2$  ( $c$  1.35,  $\text{CHCl}_3$ , 82% ee). Ee was determined by HPLC analysis using a chiral column (Daicel Chiralpak IA: 4.6 x 250 mm, 254 nm UV detector, rt, eluent: hexane/2-propanol = 19/1, flow rate: 1.0 mL/min, retention time: 17.9 min for major isomer and 15.9 min for minor isomer).

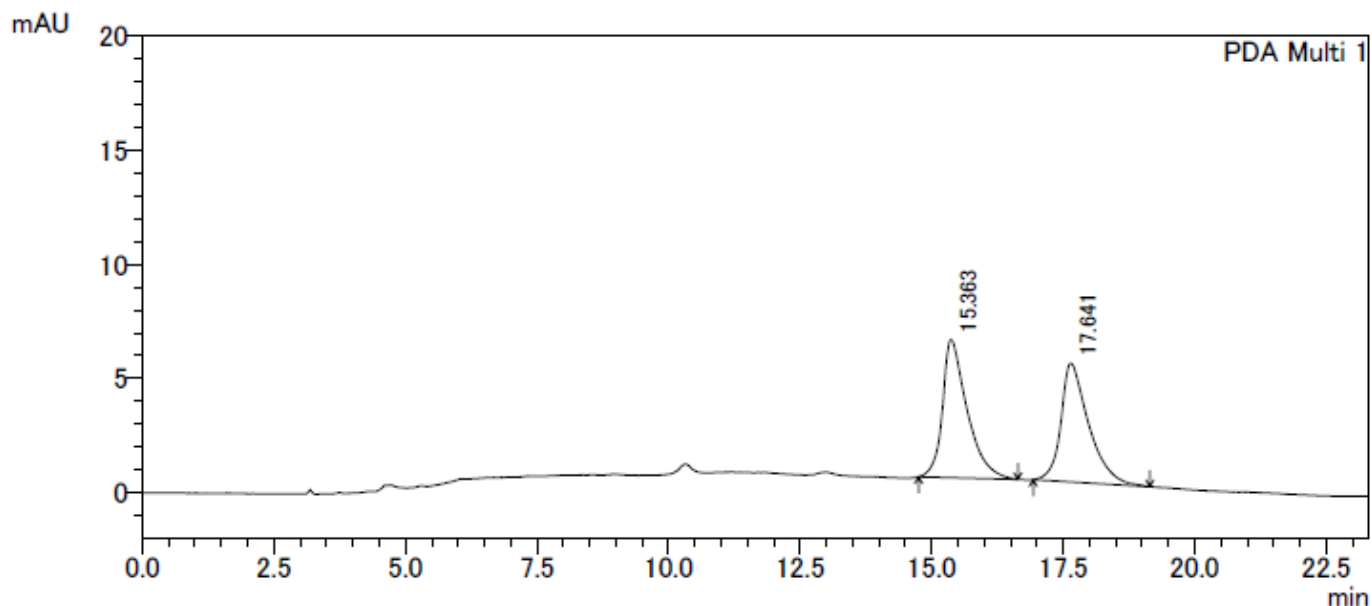

1 PDA Multi 1/254nm 4nm

ピークテーブル

PDA Ch1 254nm 4nm

| ピーク# | 保持時間   | 面積     | 高さ    | 面積%     | 高さ%     |
|------|--------|--------|-------|---------|---------|
| 1    | 15.363 | 197331 | 6070  | 50.821  | 53.893  |
| 2    | 17.641 | 190959 | 5193  | 49.179  | 46.107  |
| 合計   |        | 388290 | 11264 | 100.000 | 100.000 |

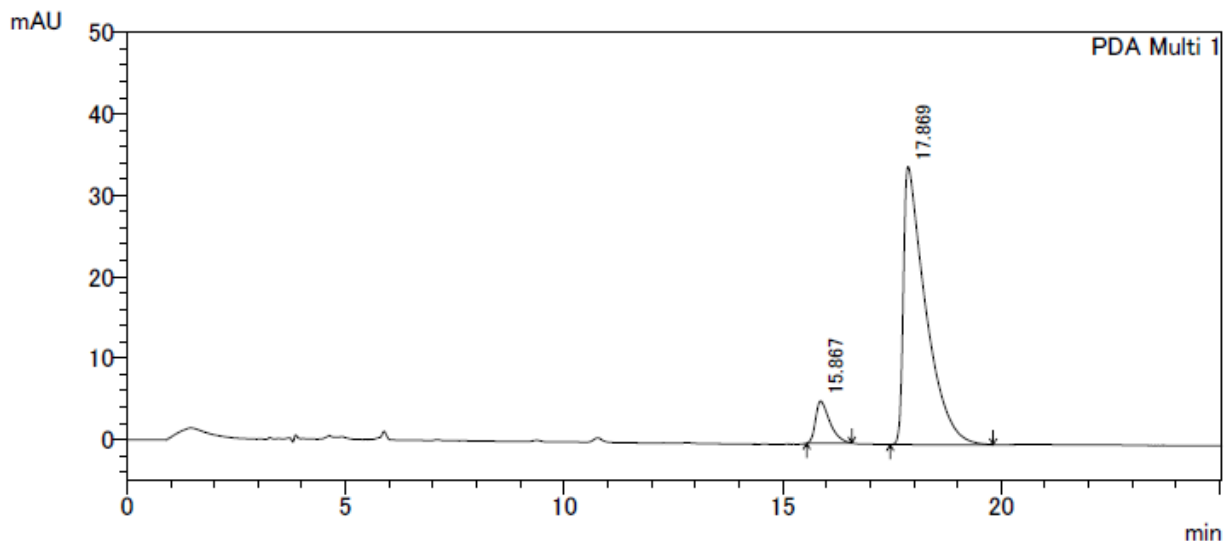

1 PDA Multi 1/254nm 4nm

PDA Ch1 254nm 4nm

| ピーク# | 保持時間   | 面積      | 高さ    | 面積%     | 高さ%     |
|------|--------|---------|-------|---------|---------|
| 1    | 15.867 | 117251  | 5172  | 8.832   | 13.152  |
| 2    | 17.869 | 1210275 | 34155 | 91.168  | 86.848  |
| 合計   |        | 1327526 | 39328 | 100.000 | 100.000 |

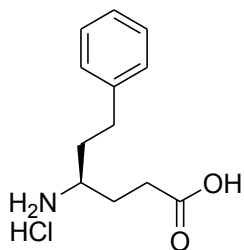

#### 4-Amino-6-phenylhexanoic acid (5a).

The title compound was obtained as white solid (86%). Mp 157 °C,  $^1\text{H}$  NMR  $\delta$  7.37-7.34 (m, 2H), 7.29-7.25 (m, 3H), 3.32-3.28 (m, 1H), 2.74-2.69 (m, 2H), 2.50-2.47 (m, 2H), 2.04-1.93 (m, 4H);  $^{13}\text{C}$  NMR  $\delta$  176.9, 140.7, 128.8, 128.4, 126.5, 50.6, 33.4, 30.5, 29.5, 26.8. HRMS(ESI) calcd for  $\text{C}_{12}\text{H}_{18}\text{NO}_2$  (M+H): 208.1332; found: 208.1333.  $[\alpha]_{\text{D}}^{27} = -4.3$  ( $c$  1.20,  $\text{H}_2\text{O}$ , 82% ee). Ee was determined by HPLC analysis using a chiral column (Daicel Chiralpak ZWIX(+): 4.6 x 250 mm, 254 nm UV detector, rt, eluent: MeOH// $\text{H}_2\text{O}$  = 49/49/2, flow rate: 1.0 mL/min, retention time: 15.9 min for major isomer and 17.5 min for minor isomer).

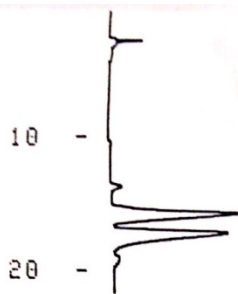

CHROMATOPAC C-R6A  
 SAMPLE NO 0  
 REPORT NO 85

FILE 1  
 METHOD 841

| PKNO  | TIME   | AREA    | MK | IDNO | CONC    | NAME |
|-------|--------|---------|----|------|---------|------|
| 1     | 15.758 | 701214  | V  |      | 49.7391 |      |
| 2     | 17.35  | 708571  | V  |      | 50.2609 |      |
| TOTAL |        | 1409784 |    |      | 100     |      |

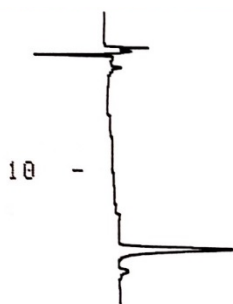

CHROMATOPAC C-R6A  
 SAMPLE NO 0  
 REPORT NO 98

FILE 1  
 METHOD 841

| PKNO  | TIME   | AREA  | MK | IDNO | CONC    | NAME |
|-------|--------|-------|----|------|---------|------|
| 1     | 15.933 | 25225 | V  |      | 90.8959 |      |
| 2     | 17.542 | 2527  |    |      | 9.1041  |      |
| TOTAL |        | 27752 |    |      | 100     |      |

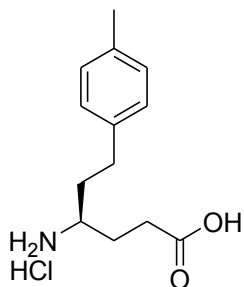

#### 4-Amino-6-*p*-tolylhexanoic acid (5b).

The title compound was obtained as white solid (71%). Mp 146 °C, <sup>1</sup>H NMR δ 7.22-7.21 (m, 4H), 3.33-3.30 (m, 1H), 2.72-2.68 (m, 2H), 2.52-2.49 (m, 2H), 2.31 (s, 3H), 2.03-1.94 (m, 4H); <sup>13</sup>C NMR δ 177.0, 137.6, 136.4, 129.3, 128.4, 50.6, 33.5, 30.0, 29.6, 26.8, 20.0. HRMS(ESI) calcd for C<sub>13</sub>H<sub>20</sub>NO<sub>2</sub> (M+H): 222.1489;

found: 222.1490.  $[\alpha]_D^{25} = -5.2$  (*c* 0.57, H<sub>2</sub>O).

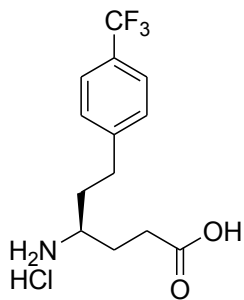

#### 4-Amino-6-(4-(trifluoromethyl)phenyl)hexanoic acid (5c).

The title compound was obtained as white solid (79%). Mp 174 °C, <sup>1</sup>H NMR δ 7.49-7.47 (d, *J* = 8.2 Hz, 2H), 7.29-7.27 (d, *J* = 8.0 Hz, 2H), 3.27-3.24 (m, 1H), 2.74-2.62 (m, 2H), 2.42-2.39 (t, *J* = 7.5 Hz, 2H), 1.94-1.84 (m, 4H); <sup>13</sup>C NMR δ 176.6, 144.8, 128.7, 127.8, 125.3 (q, *J*<sub>C-F</sub> = 3.9 Hz, 1C), 123.2, 33.1, 30.4, 29.4, 26.7. HRMS(ESI) calcd for C<sub>13</sub>H<sub>17</sub>F<sub>3</sub>NO<sub>2</sub> (M+H): 276.1207; found: 276.1206.  $[\alpha]_D^{28} = -5.0$  (*c* 2.20, H<sub>2</sub>O).

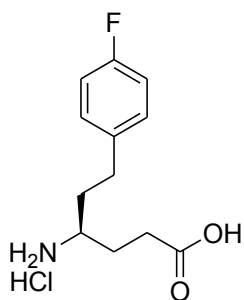

#### 4-Amino-6-(4-fluorophenyl)hexanoic acid (5d).

The title compound was obtained as white solid (93%). Mp 161 °C, <sup>1</sup>H NMR δ 7.28-7.25 (m, 2H), 7.09-7.06 (m, 2H), 3.33-3.27 (m, 1H), 2.77-2.66 (m, 2H), 2.48 (t, *J* = 7.5 Hz, 2H), 2.04-1.87 (m, 4H); <sup>13</sup>C NMR δ 177.1, 162.2, 160.3, 136.4, 136.3, 129.9, 129.9, 115.2 (d, *J*<sub>C-F</sub> = 10.7 Hz, 1C), 50.6, 33.5, 29.7, 29.6, 26.8. HRMS(ESI) calcd for C<sub>12</sub>H<sub>17</sub>FNO<sub>2</sub> (M+H): 226.1238; found: 226.1239.  $[\alpha]_D^{30} = -3.7$  (*c* 0.64, H<sub>2</sub>O).

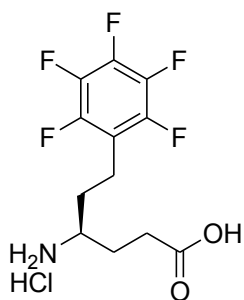

#### 4-Amino-6-(pentafluorophenyl)hexanoic acid (5f).

The title compound was obtained as yellow paste (71%). Mp decomp (> 210 °C). <sup>1</sup>H NMR δ 3.42-3.39 (m, 1H), 2.91-2.87 (m, 2H), 2.58-2.55 (t, *J* = 7.5 Hz, 2H), 2.12-1.96 (m, 4H); <sup>13</sup>C NMR δ 176.8, 145.9, 143.9, 138.2, 136.3, 113.2, 50.6, 31.0, 29.5, 26.7, 17.7. HRMS(ESI) calcd for C<sub>12</sub>H<sub>13</sub>F<sub>5</sub>NO<sub>2</sub> (M+H): 298.0861; found: 298.0860.  $[\alpha]_D^{29} = -2.3$  (*c* 0.81, H<sub>2</sub>O).

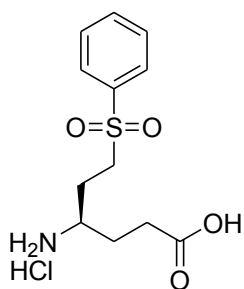

#### 4-Amino-6-(phenylsulfonyl)hexanoic acid (5i).

The title compound was obtained as brown paste (64%). Mp decomp (> 210 °C).  $^1\text{H}$  NMR  $\delta$  7.81 (d,  $J$  = 7.8 Hz, 2H), 7.68 (t,  $J$  = 7.4 Hz, 1H), 7.56 (t,  $J$  = 7.7 Hz, 2H), 3.41-3.38 (m, 2H), 3.31-3.29 (m, 1H), 2.31-2.29 (m, 2H), 1.92-1.88 (m, 2H), 1.79-1.73 (m, 2H);  $^{13}\text{C}$  NMR  $\delta$  176.5, 136.2, 135.0, 129.8, 127.8, 51.0, 49.5, 29.2, 26.4, 25.0. HRMS(ESI) calcd for  $\text{C}_{12}\text{H}_{18}\text{NO}_4\text{S}$  (M+H): 272.0951; found: 272.0951.  $[\alpha]^{32}_{\text{D}} = -3.1$  (c 2.40,  $\text{H}_2\text{O}$ ).

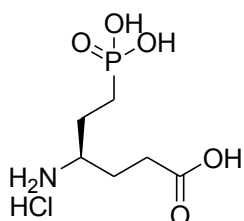

#### 4-Amino-6-phosphonohexanoic acid (5j).

The title compound was obtained as yellow paste (56%). Mp decomp (> 210 °C).  $^1\text{H}$  NMR  $\delta$  3.38-3.35 (m, 1H), 2.53-2.50 (m, 2H), 2.01-1.84 (m, 4H), 1.70-1.65 (m, 2H);  $^{13}\text{C}$  NMR  $\delta$  176.8, 51.6, 29.5, 28.7, 26.6, 25.8. HRMS(ESI) calcd for  $\text{C}_6\text{H}_{14}\text{NO}_5\text{P}$  (M+H): 212.0682; found: 212.0683.  $[\alpha]^{32}_{\text{D}} = -1.2$  (c 1.12,  $\text{H}_2\text{O}$ ).

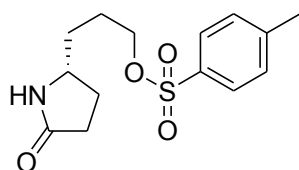

#### 3-(5-Oxopyrrolidin-2-yl)propyl 4-methylbenzenesulfonate (6).

The title compound was obtained as white solid (59%). Mp 86 °C,  $^1\text{H}$  NMR  $\delta$  7.78 (d,  $J$  = 8.3 Hz, 2H), 7.50 (br, 1H), 7.35 (d,  $J$  = 8.2 Hz, 2H), 4.05-4.02 (m, 2H), 3.61-3.57 (m, 1H), 2.45-2.42 (m, 3H), 2.34-2.19 (m, 3H), 1.75-1.61 (m, 3H), 1.56-1.51 (m, 1H);  $^{13}\text{C}$  NMR  $\delta$  178.6, 144.8, 132.8, 129.8, 127.7, 70.0, 53.9, 32.5, 30.1, 26.8, 25.2, 21.5. HRMS(ESI) calcd for  $\text{C}_{14}\text{H}_{19}\text{NNaO}_4\text{S}$  (M+Na): 320.0927; found: 320.0926.  $[\alpha]^{28}_{\text{D}} = -23.7$  (c 4.20,  $\text{CHCl}_3$ , 90% ee). Ee was determined by HPLC analysis using a chiral column (Daicel Chiralpak IB: 4.6 x 250 mm, 254 nm UV detector, rt, eluent: hexane/2-propanol = 1/1, flow rate: 0.5 mL/min, retention time: 17.2 min for major isomer and 19.4 min for minor isomer).



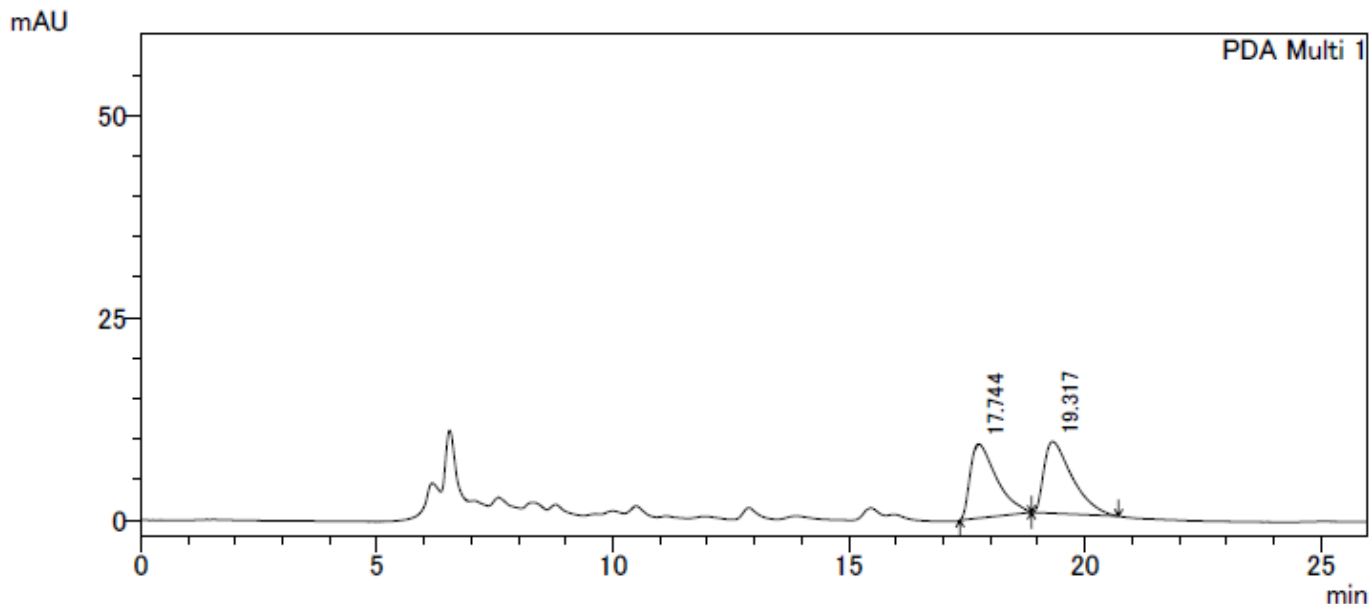

1 PDA Multi 1/254nm 4nm

ピークテーブル

PDA Ch1 254nm 4nm

| ピーク# | 保持時間   | 面積     | 高さ    | 面積%     | 高さ%     |
|------|--------|--------|-------|---------|---------|
| 1    | 17.744 | 355559 | 9163  | 48.904  | 50.826  |
| 2    | 19.317 | 371497 | 8865  | 51.096  | 49.174  |
| 合計   |        | 727055 | 18028 | 100.000 | 100.000 |

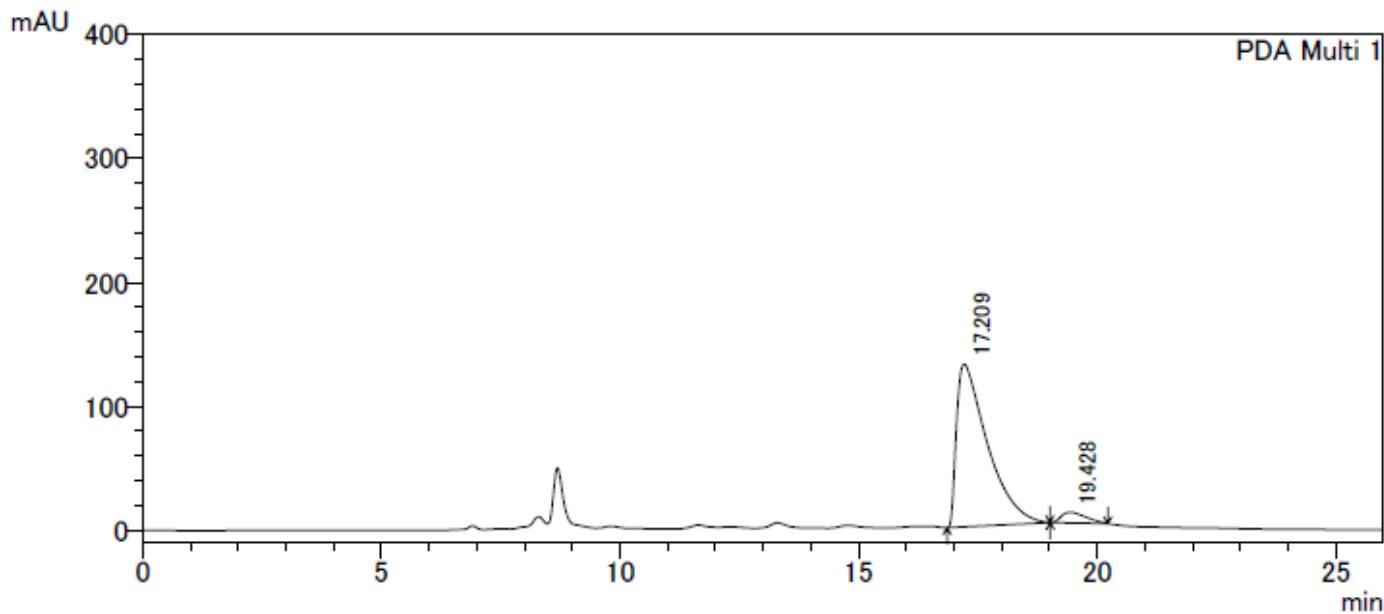

1 PDA Multi 1/254nm 4nm

ピークテーブル

PDA Ch1 254nm 4nm

| ピーク# | 保持時間   | 面積      | 高さ     | 面積%     | 高さ%     |
|------|--------|---------|--------|---------|---------|
| 1    | 17.209 | 5920300 | 131599 | 95.010  | 93.829  |
| 2    | 19.428 | 310968  | 8655   | 4.990   | 6.171   |
| 合計   |        | 6231269 | 140254 | 100.000 | 100.000 |

## 2) <sup>1</sup>H NMR and <sup>13</sup>C NMR spectra for new compounds

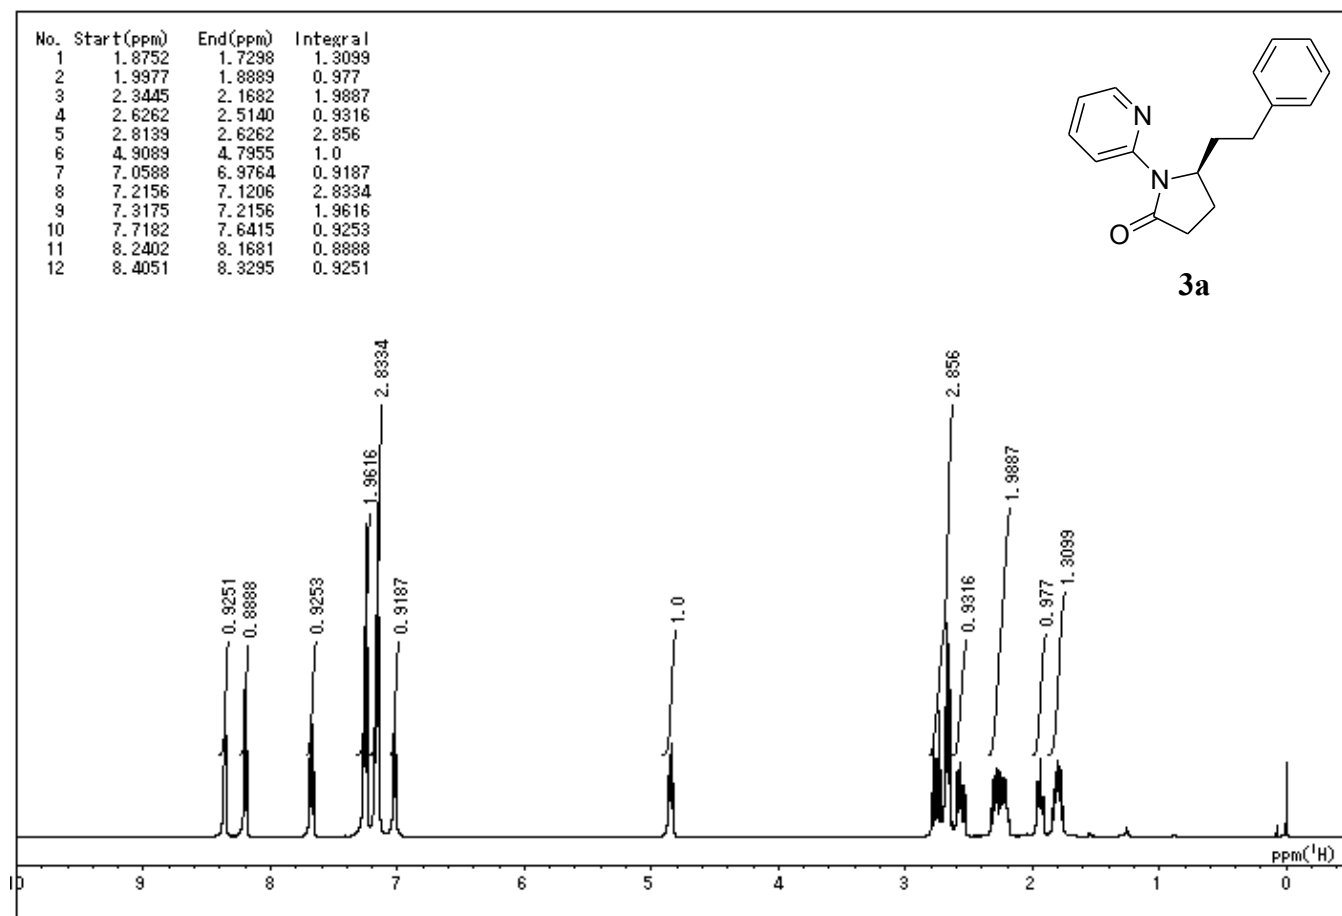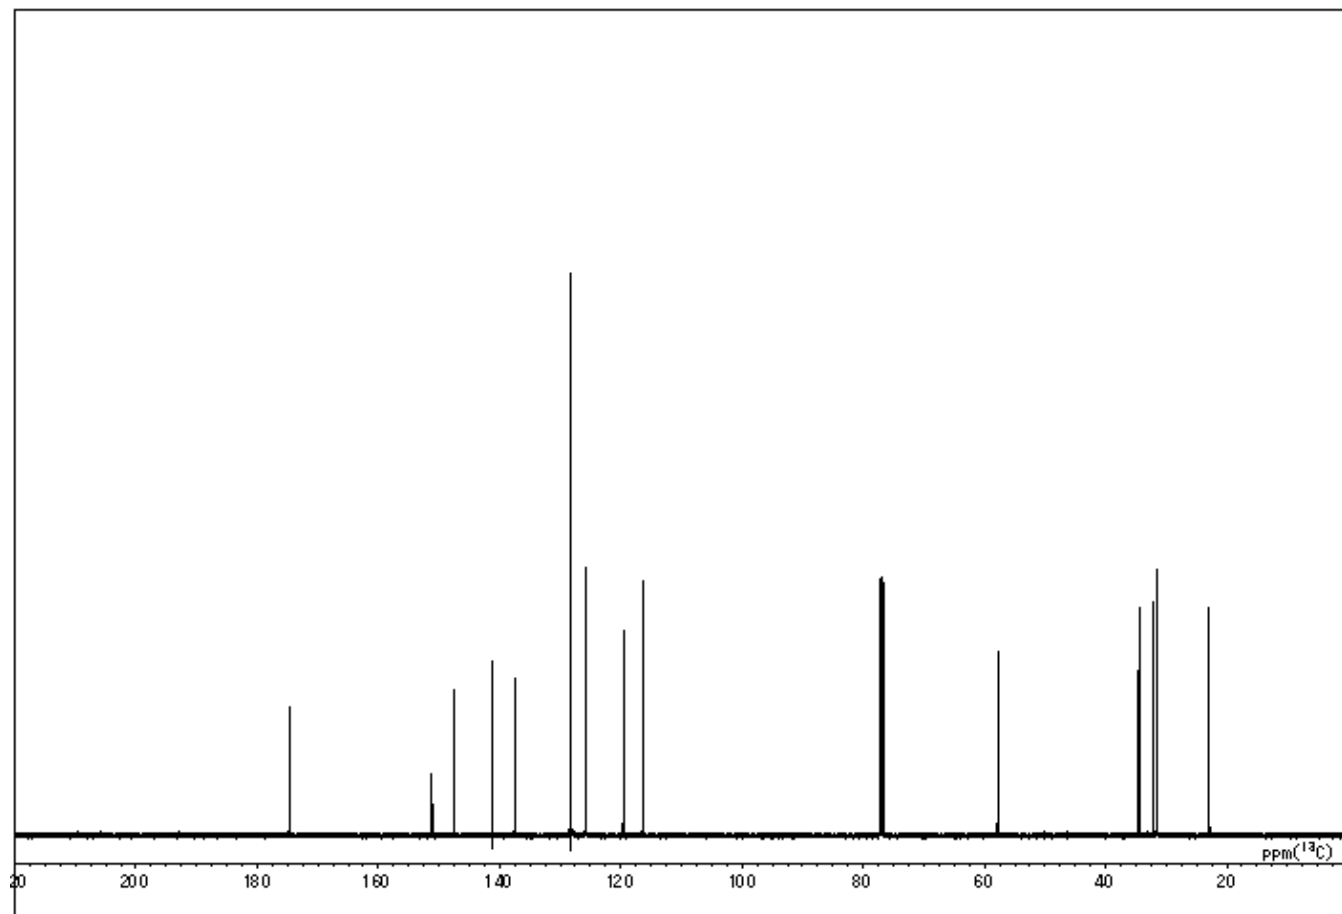

| No. | Start(ppm) | End(ppm) | Integral |
|-----|------------|----------|----------|
| 1   | 1.8639     | 1.6429   | 1.2019   |
| 2   | 2.0173     | 1.8730   | 0.9804   |
| 3   | 2.2462     | 2.1489   | 0.9255   |
| 4   | 2.3344     | 2.2462   | 3.8848   |
| 5   | 2.6893     | 2.4843   | 3.0538   |
| 6   | 2.8415     | 2.6893   | 0.9913   |
| 7   | 4.8907     | 4.7545   | 1.0      |
| 8   | 7.1104     | 6.9319   | 4.9863   |
| 9   | 7.7389     | 7.5867   | 1.0233   |
| 10  | 8.2323     | 8.1304   | 0.9327   |
| 11  | 8.4029     | 8.3090   | 0.9868   |

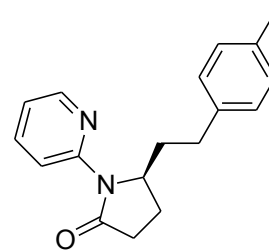

**3b**

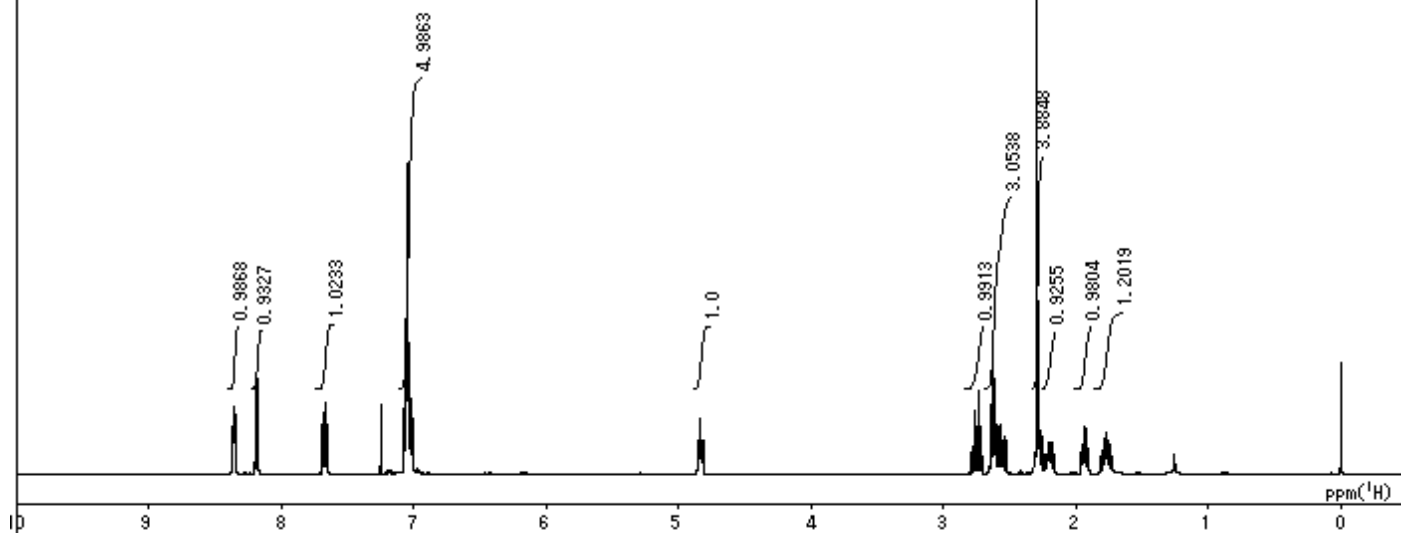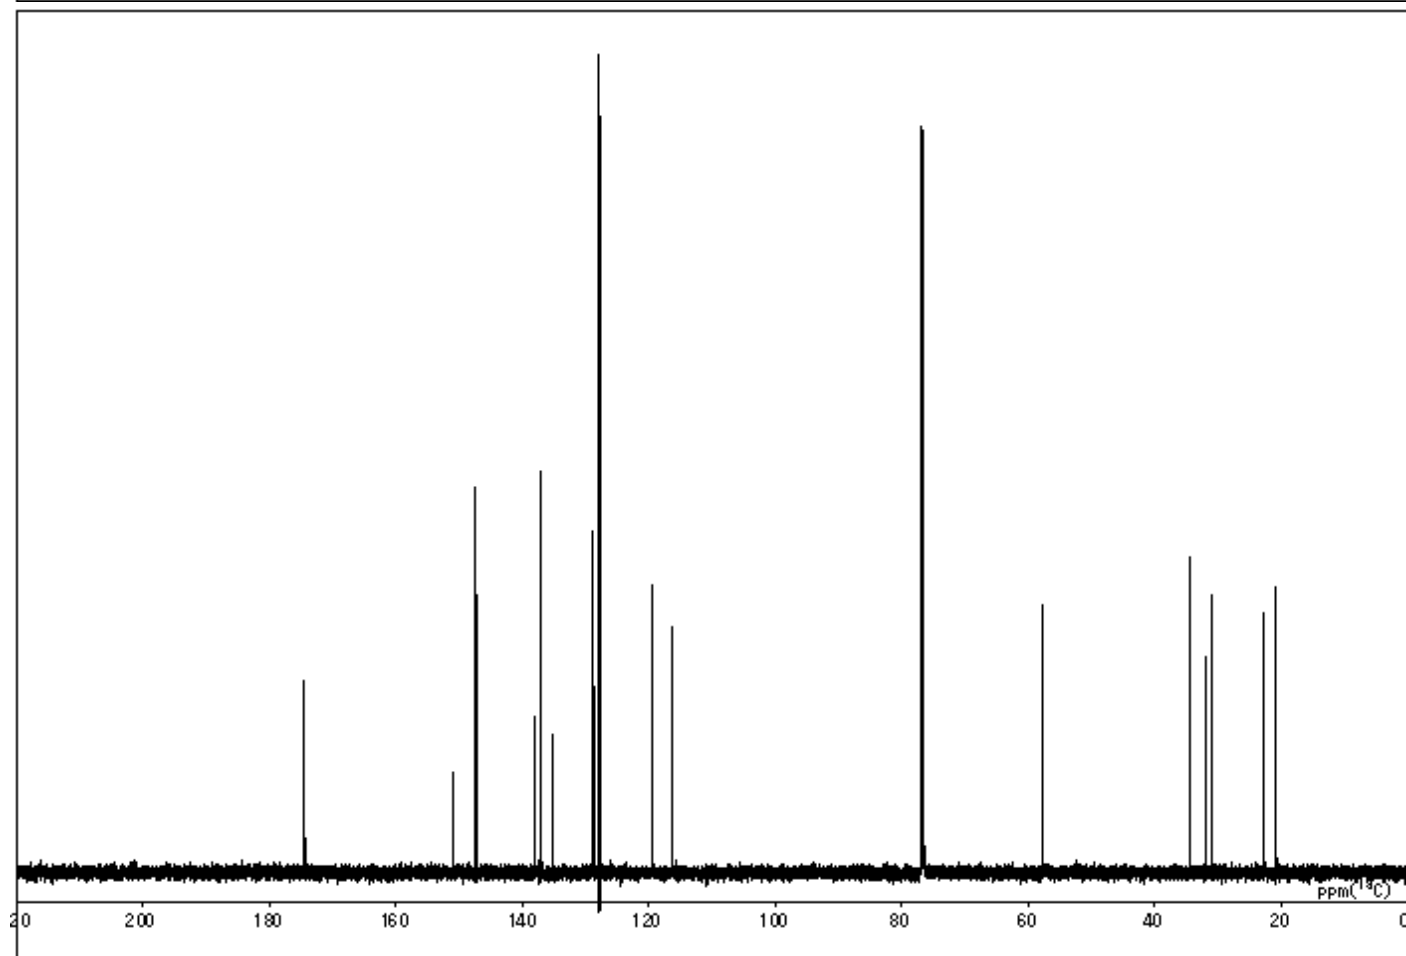

| No. | Start(ppm) | End(ppm) | Integral |
|-----|------------|----------|----------|
| 1   | 1.8888     | 1.7754   | 0.9774   |
| 2   | 1.9872     | 1.8991   | 0.9863   |
| 3   | 2.3570     | 2.1933   | 2.0525   |
| 4   | 2.6340     | 2.5367   | 1.0101   |
| 5   | 2.8218     | 2.6844   | 3.1308   |
| 6   | 4.8847     | 4.8034   | 1.0      |
| 7   | 7.0701     | 6.9842   | 1.0165   |
| 8   | 7.3105     | 7.2223   | 2.1395   |
| 9   | 7.5429     | 7.4662   | 1.9978   |
| 10  | 7.7157     | 7.6402   | 0.9863   |
| 11  | 8.2435     | 8.1679   | 0.9738   |
| 12  | 8.3717     | 8.3099   | 0.9996   |

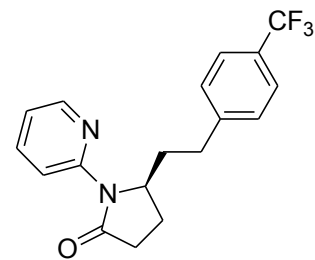

**3c**

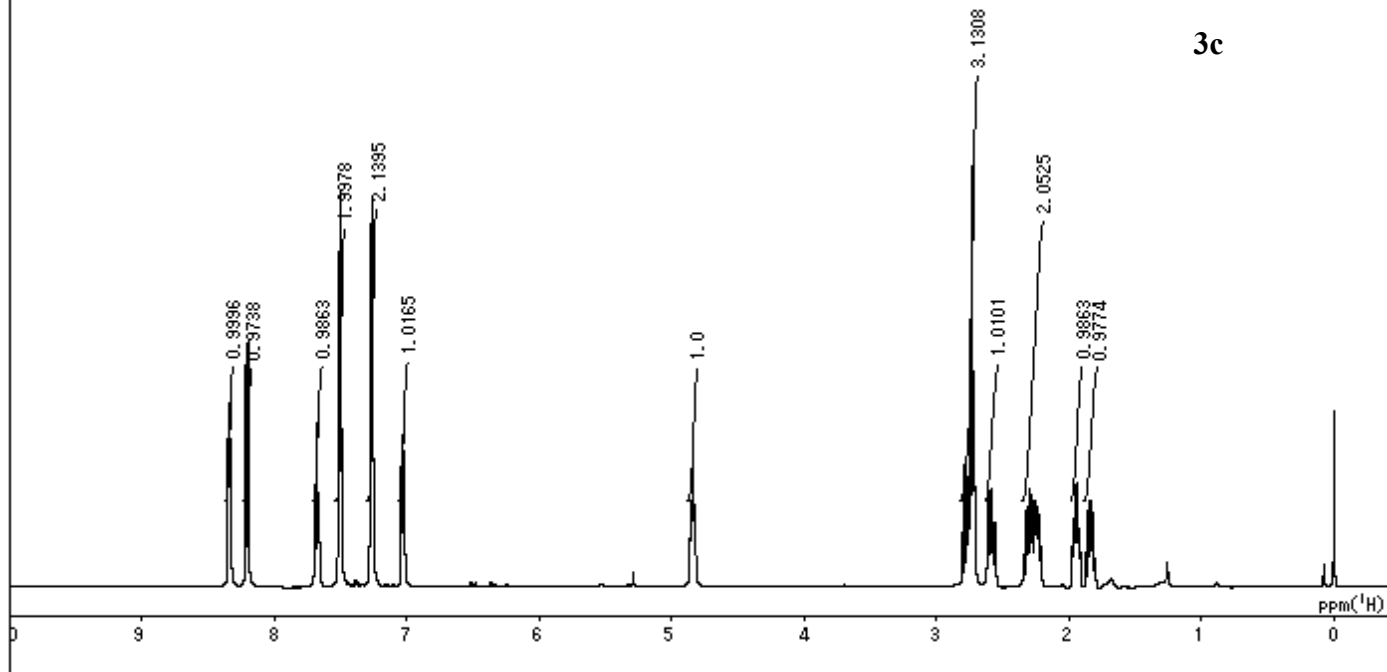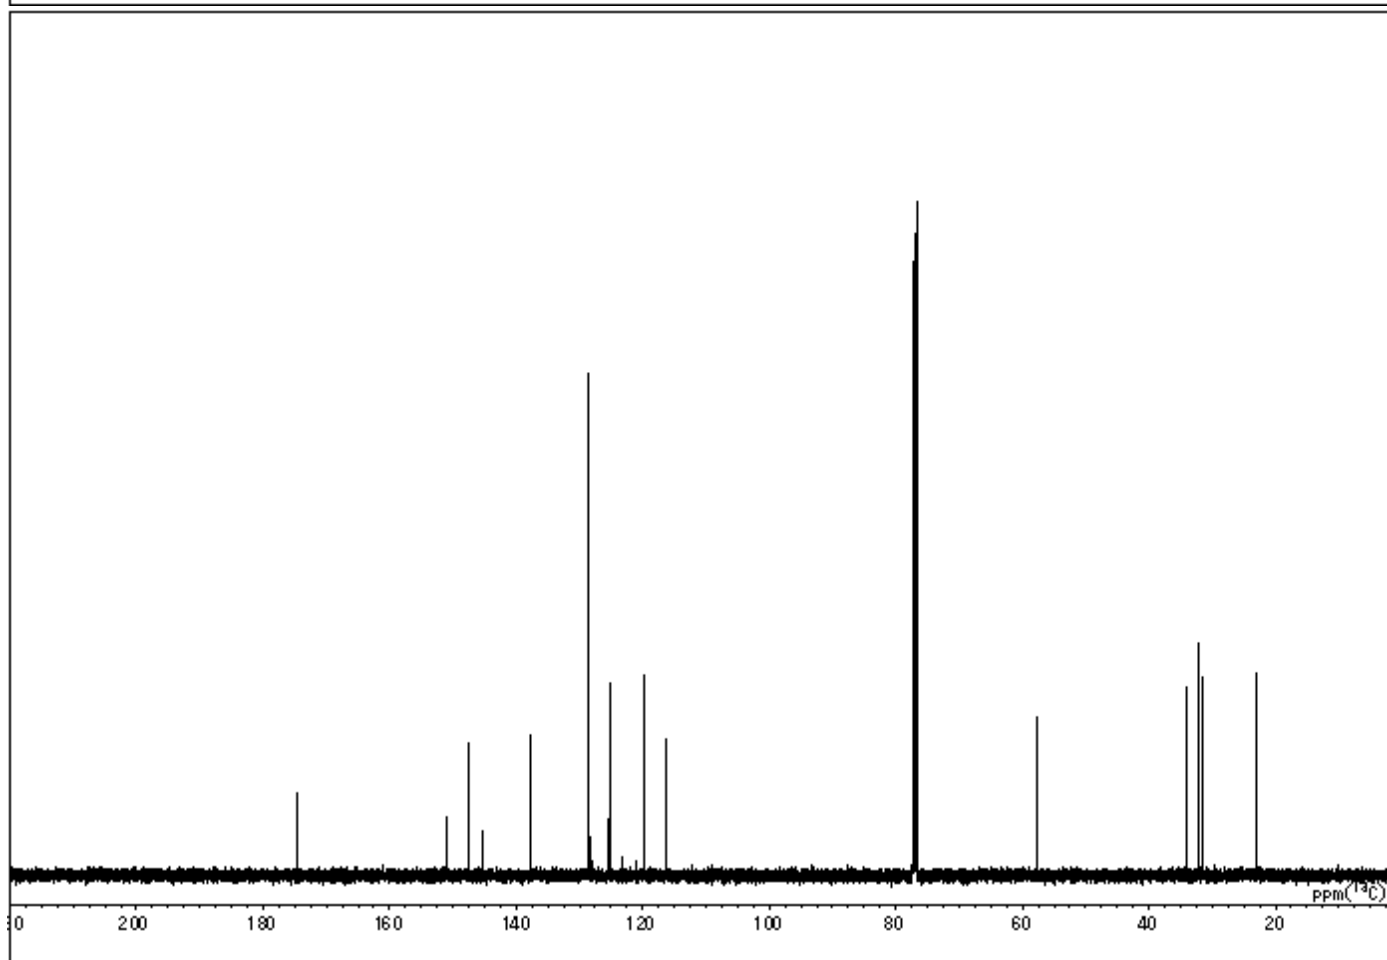

| No. | Start(ppm) | End(ppm) | Integral |
|-----|------------|----------|----------|
| 1   | 1.8448     | 1.7028   | 1.0058   |
| 2   | 1.9846     | 1.8712   | 0.9788   |
| 3   | 2.3523     | 2.1186   | 1.8983   |
| 4   | 2.6902     | 2.5046   | 2.8643   |
| 5   | 2.8391     | 2.6902   | 0.961    |
| 6   | 4.8907     | 4.7670   | 1.0      |
| 7   | 6.9950     | 6.8587   | 1.8404   |
| 8   | 7.0603     | 6.9870   | 0.9823   |
| 9   | 7.1542     | 7.0603   | 1.8648   |
| 10  | 7.7338     | 7.6170   | 1.052    |
| 11  | 8.2504     | 8.1542   | 0.9774   |
| 12  | 8.3936     | 8.2917   | 0.9959   |

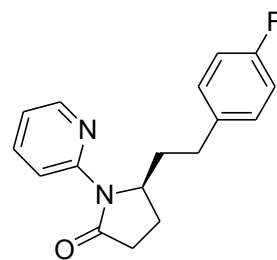

**3d**

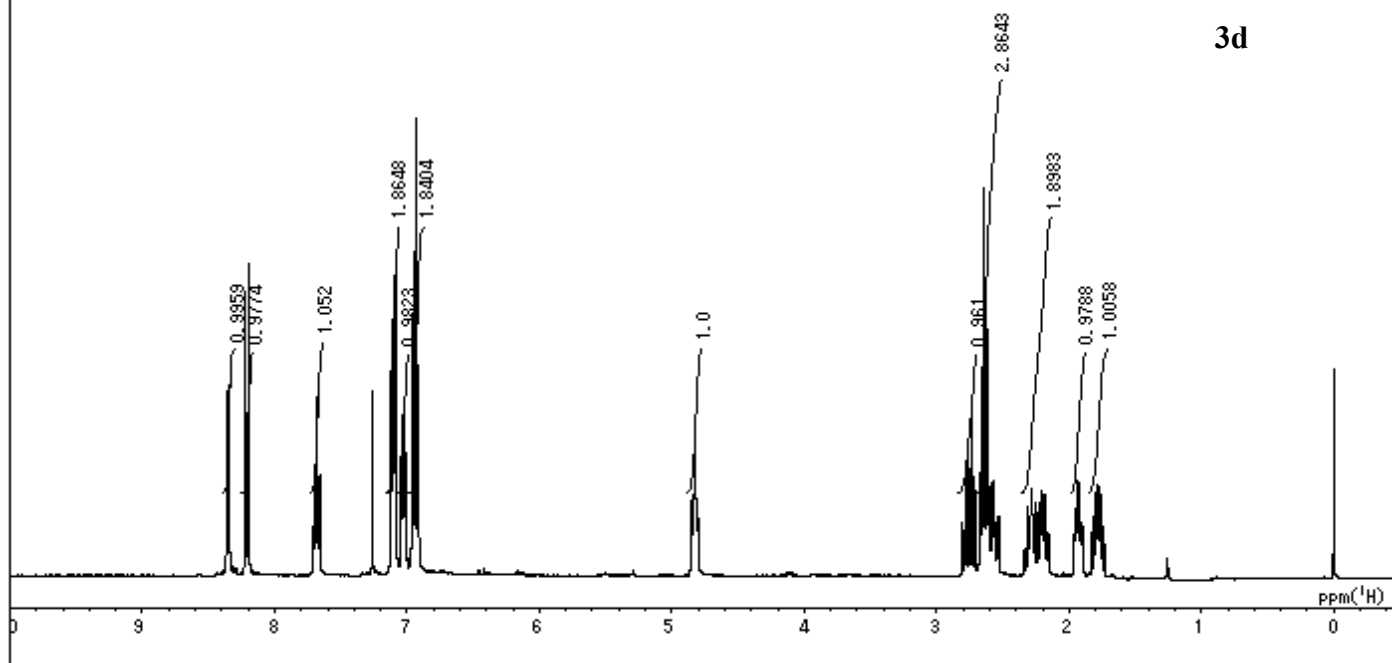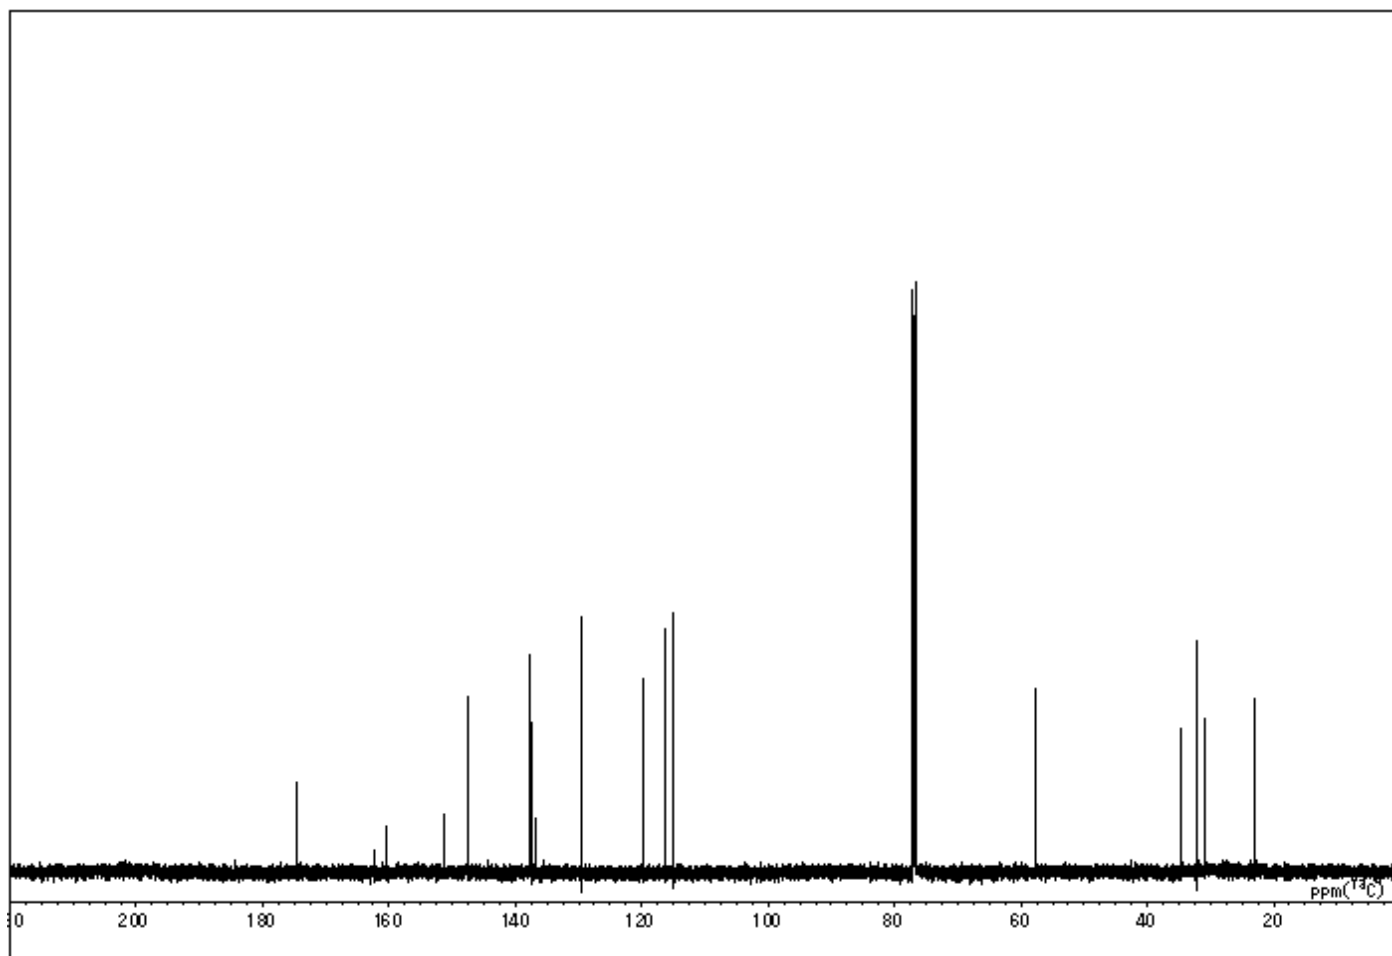

| No. | Start(ppm) | End(ppm) | Integral |
|-----|------------|----------|----------|
| 1   | 1.8370     | 1.7191   | 1.1134   |
| 2   | 1.9595     | 1.8690   | 0.9971   |
| 3   | 2.3338     | 2.1404   | 2.0271   |
| 4   | 2.6612     | 2.5078   | 3.0617   |
| 5   | 2.8089     | 2.6956   | 1.0377   |
| 6   | 4.8547     | 4.7768   | 1.0      |
| 7   | 7.0618     | 6.9805   | 3.0304   |
| 8   | 7.4030     | 7.3320   | 1.9525   |
| 9   | 7.7189     | 7.6308   | 1.0383   |
| 10  | 8.2398     | 8.1643   | 0.9713   |
| 11  | 8.3795     | 8.3039   | 0.9936   |

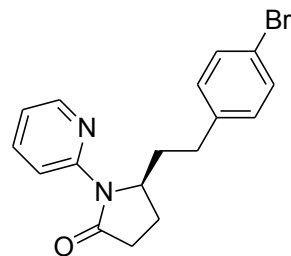

3e

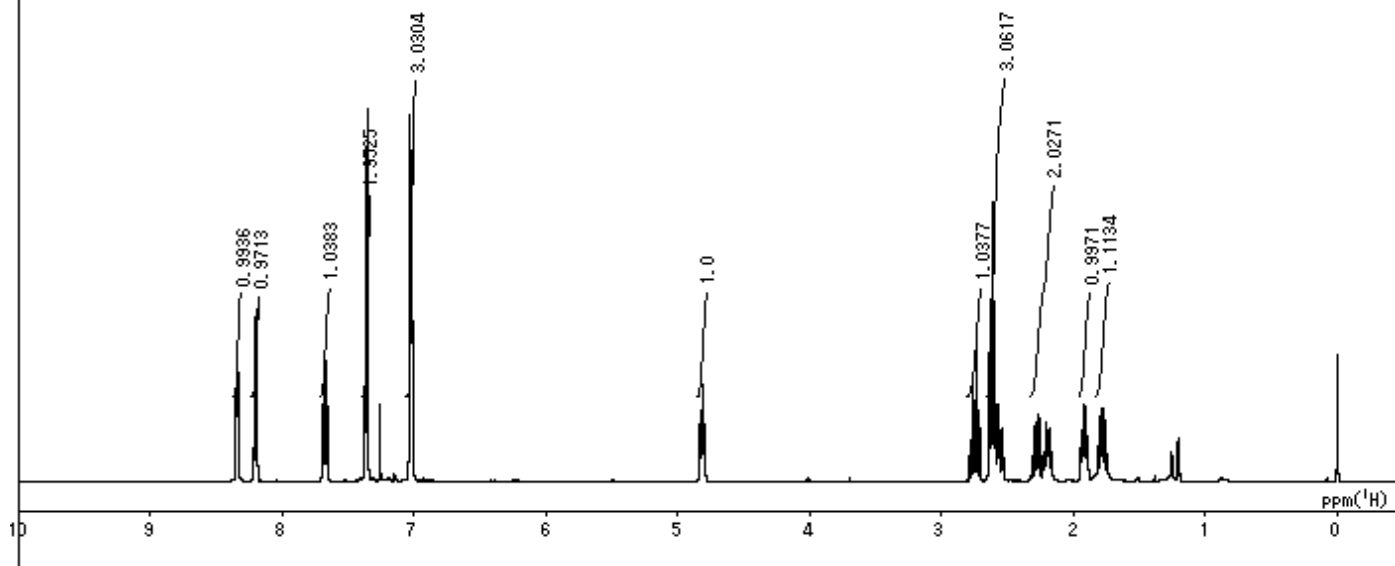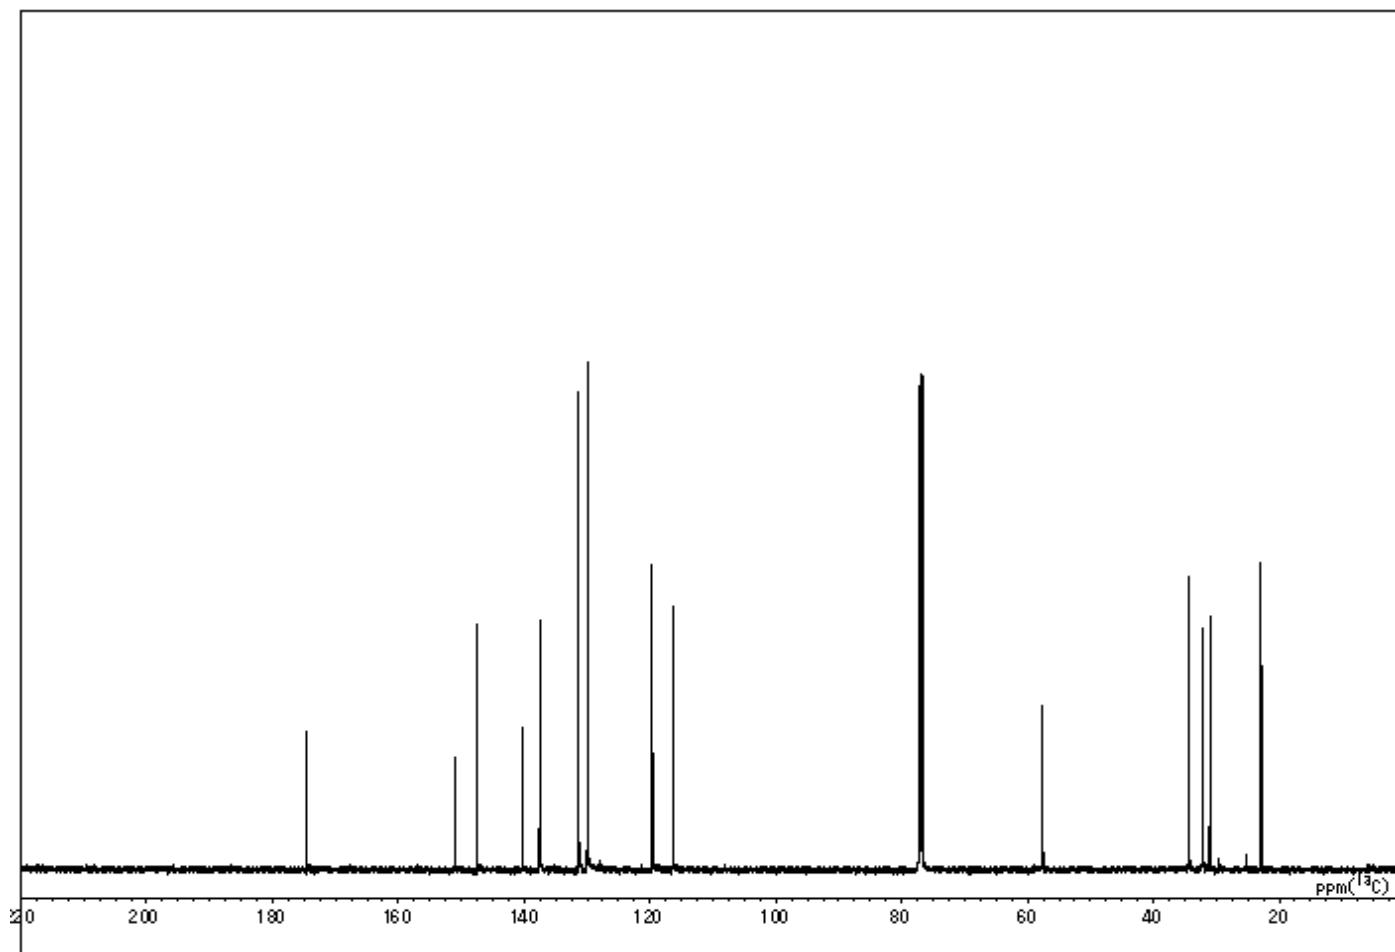

| No. | Start(ppm) | End(ppm) | Integral |
|-----|------------|----------|----------|
| 1   | 1.8693     | 1.6850   | 1.334    |
| 2   | 2.0548     | 1.9311   | 0.9406   |
| 3   | 2.2219     | 2.0811   | 0.9713   |
| 4   | 2.4417     | 2.2654   | 0.9951   |
| 5   | 2.6615     | 2.5562   | 1.0357   |
| 6   | 2.8824     | 2.6615   | 3.052    |
| 7   | 4.8366     | 4.6958   | 1.0      |
| 8   | 7.0632     | 6.9842   | 1.0395   |
| 9   | 7.7673     | 7.6093   | 1.067    |
| 10  | 8.2527     | 8.1702   | 0.9347   |
| 11  | 8.3500     | 8.2527   | 1.071    |

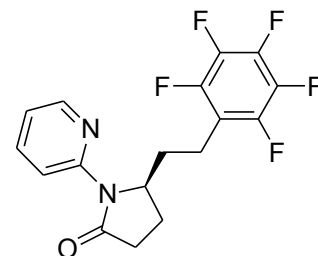

**3f**

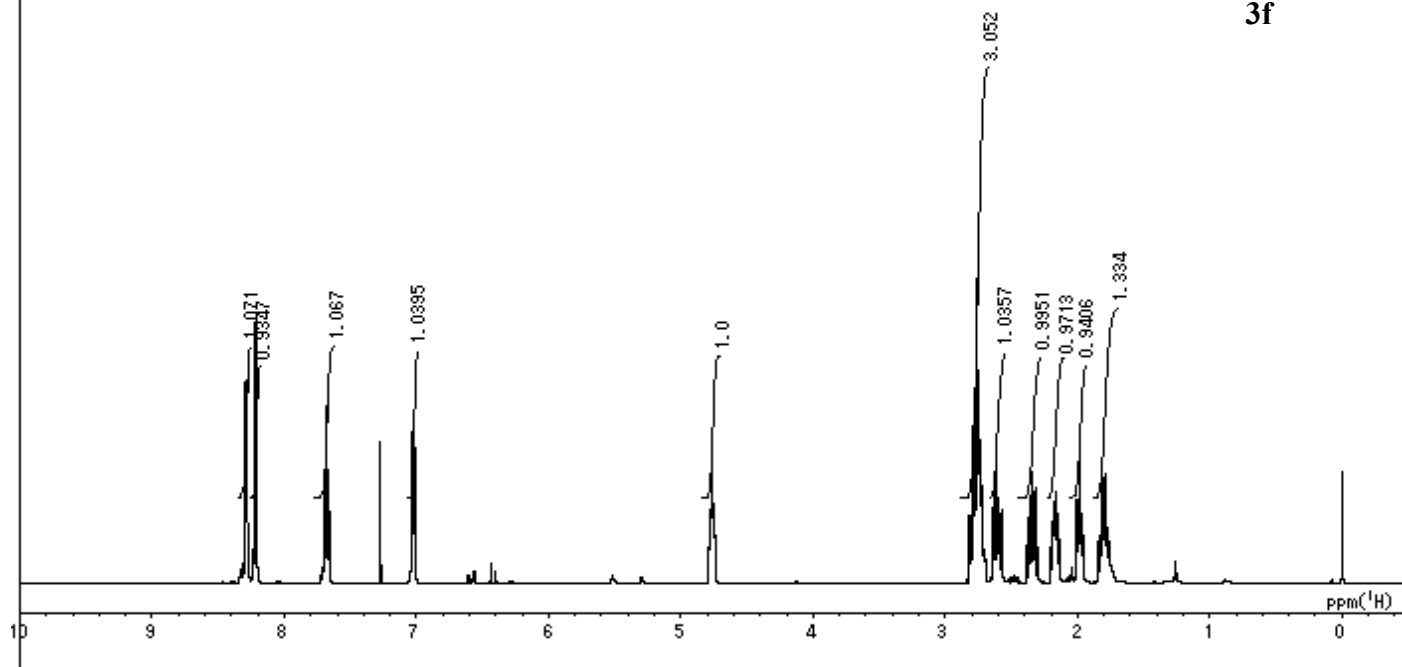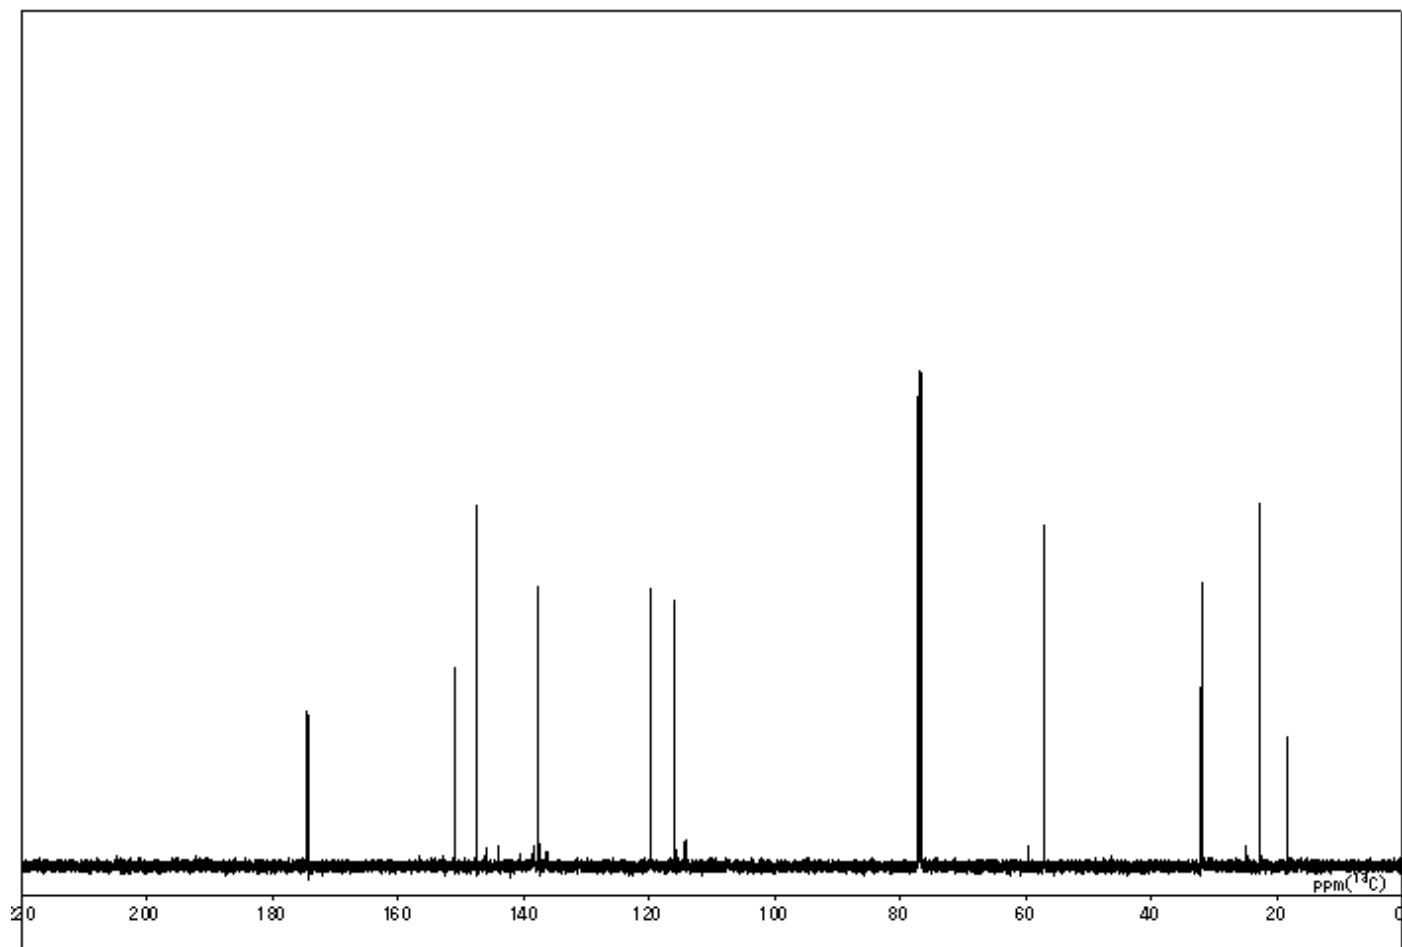

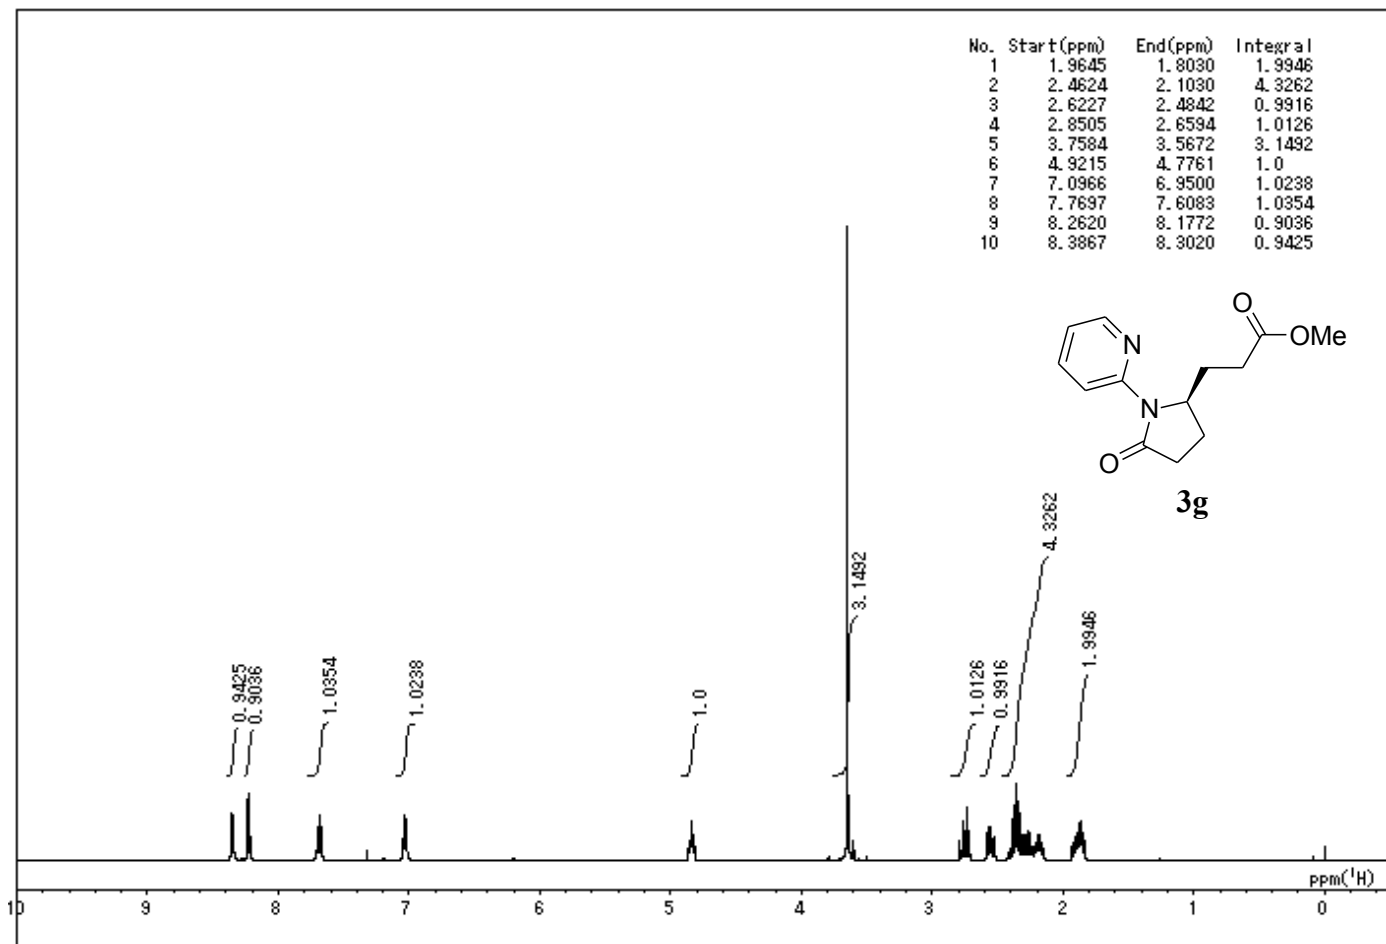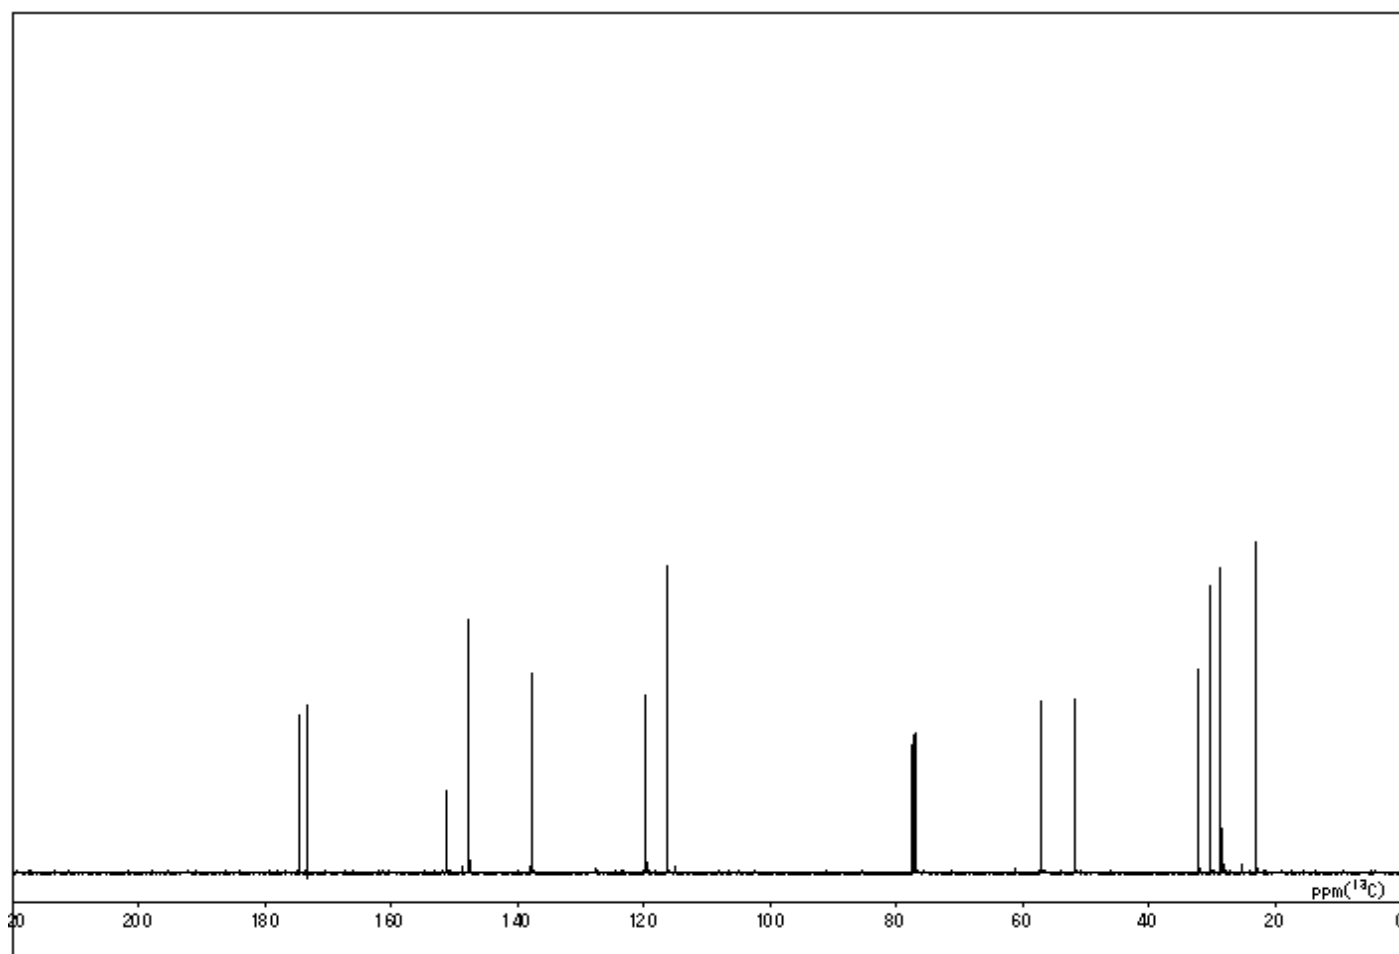



| No. | Start(ppm) | End(ppm) | Integral |
|-----|------------|----------|----------|
| 1   | 1.2797     | 1.2076   | 3.0      |
| 2   | 1.9460     | 1.8166   | 1.9949   |
| 3   | 2.4131     | 2.1486   | 4.0579   |
| 4   | 2.6100     | 2.5081   | 0.9821   |
| 5   | 2.8138     | 2.6993   | 0.9901   |
| 6   | 4.1623     | 4.0627   | 1.9543   |
| 7   | 4.8870     | 4.8034   | 0.9766   |
| 8   | 7.0632     | 6.9968   | 0.975    |
| 9   | 7.7261     | 7.6494   | 0.9711   |
| 10  | 8.2572     | 8.1989   | 0.9193   |
| 11  | 8.3843     | 8.3305   | 0.9322   |

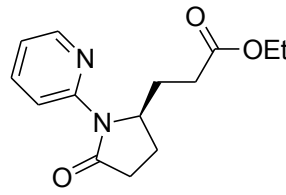

**3h**

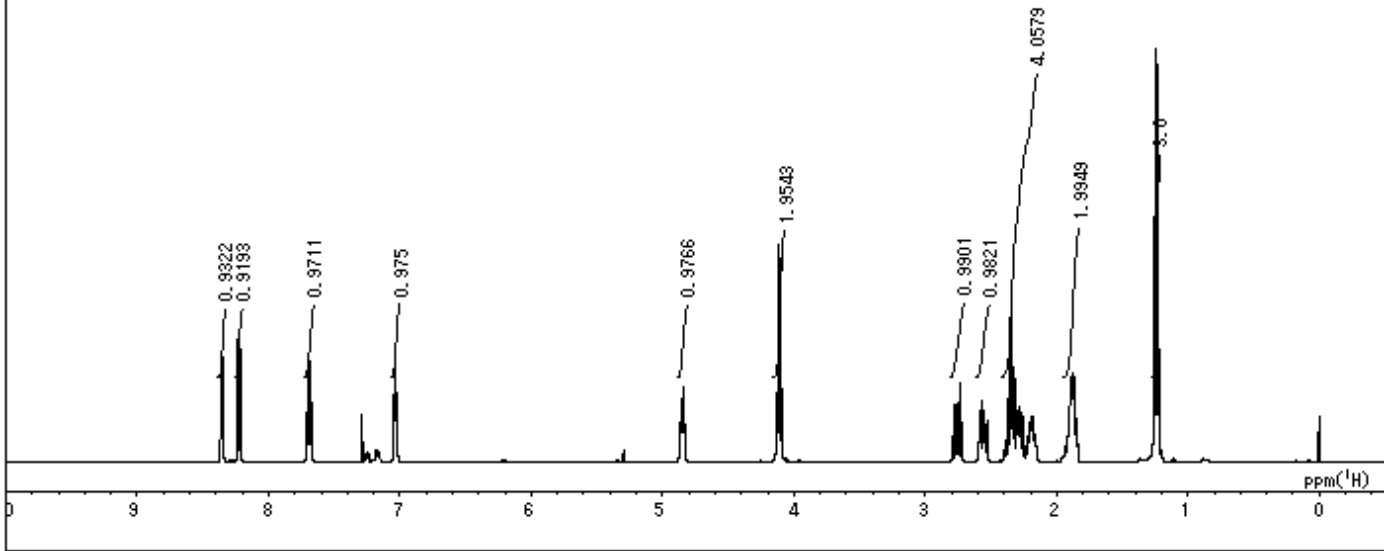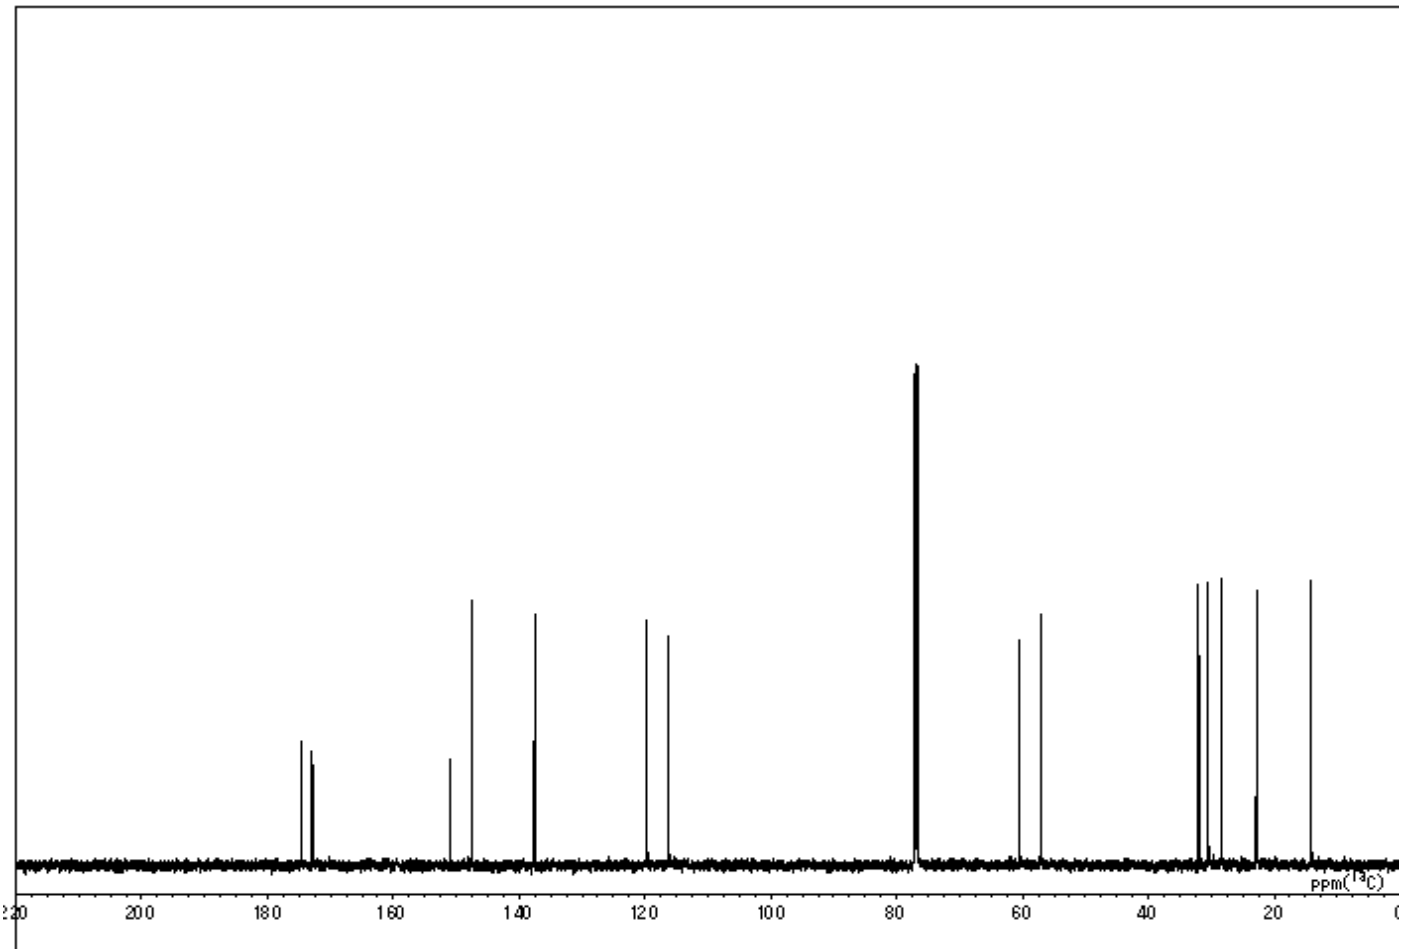

| No. | Start(ppm) | End(ppm) | Integral |
|-----|------------|----------|----------|
| 1   | 1.8626     | 1.7401   | 0.8071   |
| 2   | 2.0652     | 1.9427   | 0.8056   |
| 3   | 2.3468     | 2.1888   | 1.9044   |
| 4   | 2.6113     | 2.4705   | 0.9886   |
| 5   | 2.7693     | 2.6113   | 0.9804   |
| 6   | 3.2455     | 3.0074   | 2.0104   |
| 7   | 4.8562     | 4.7417   | 1.0      |
| 8   | 7.0565     | 6.9420   | 0.9956   |
| 9   | 7.5854     | 7.4789   | 1.9432   |
| 10  | 7.7342     | 7.5934   | 1.9211   |
| 11  | 7.9105     | 7.7869   | 1.8997   |
| 12  | 8.2803     | 8.1395   | 1.9998   |

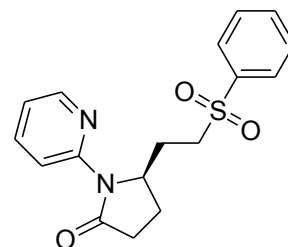

**3i**

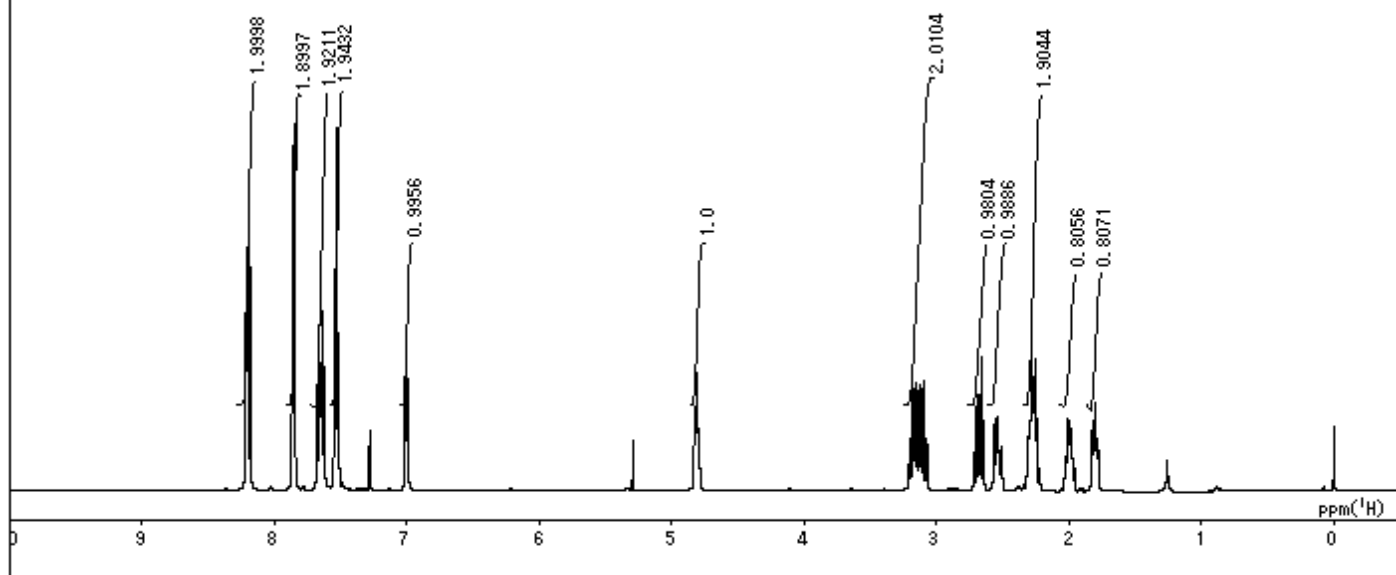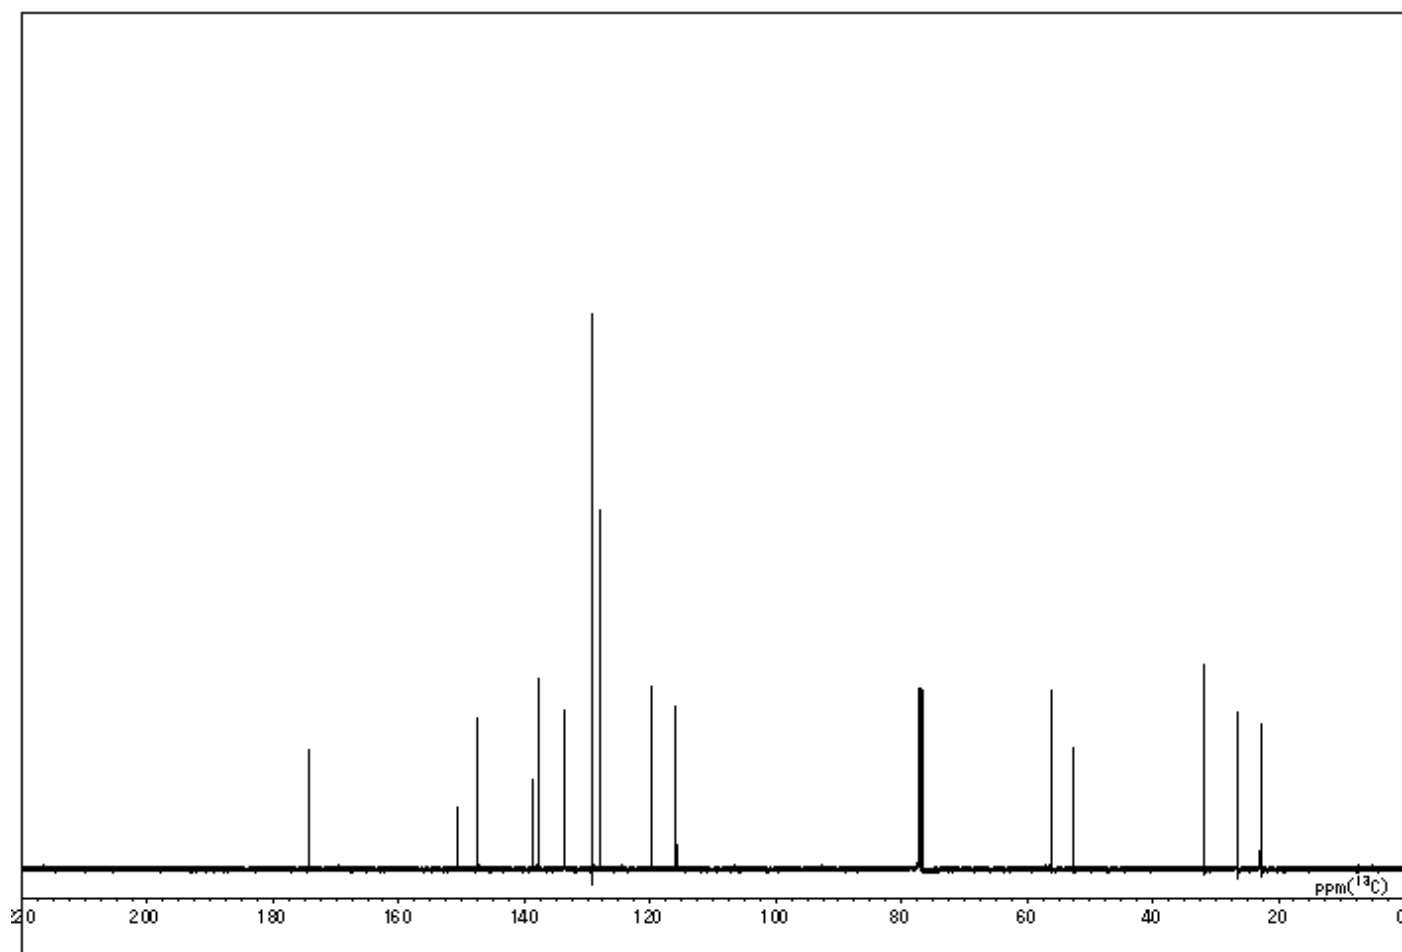

| No. | Start(ppm) | End(ppm) | Integral |
|-----|------------|----------|----------|
| 1   | 1.3244     | 1.2076   | 6.2202   |
| 2   | 1.9243     | 1.6426   | 3.9202   |
| 3   | 2.2185     | 2.0891   | 0.7016   |
| 4   | 2.3432     | 2.2185   | 0.9973   |
| 5   | 2.6214     | 2.5138   | 0.9919   |
| 6   | 2.8035     | 2.6752   | 1.0234   |
| 7   | 4.1383     | 3.9517   | 4.0238   |
| 8   | 4.8652     | 4.7874   | 1.0      |
| 9   | 7.0747     | 7.0025   | 1.0598   |
| 10  | 7.7398     | 7.6516   | 1.0048   |
| 11  | 8.2481     | 8.1863   | 0.9487   |
| 12  | 8.3786     | 8.3259   | 1.0208   |

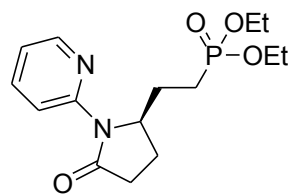

3j

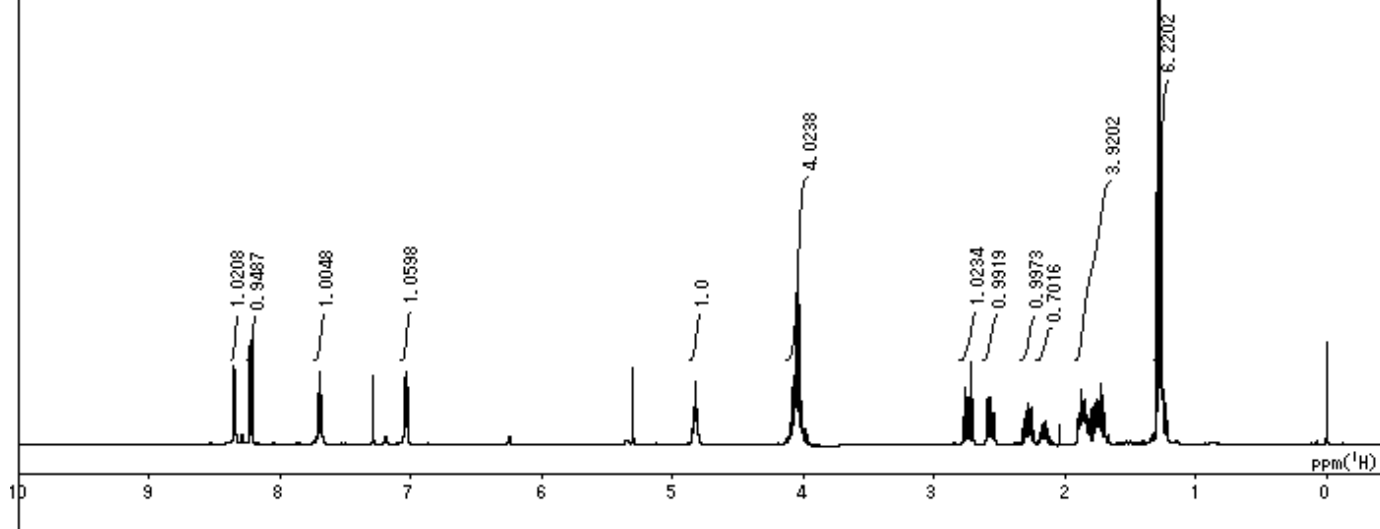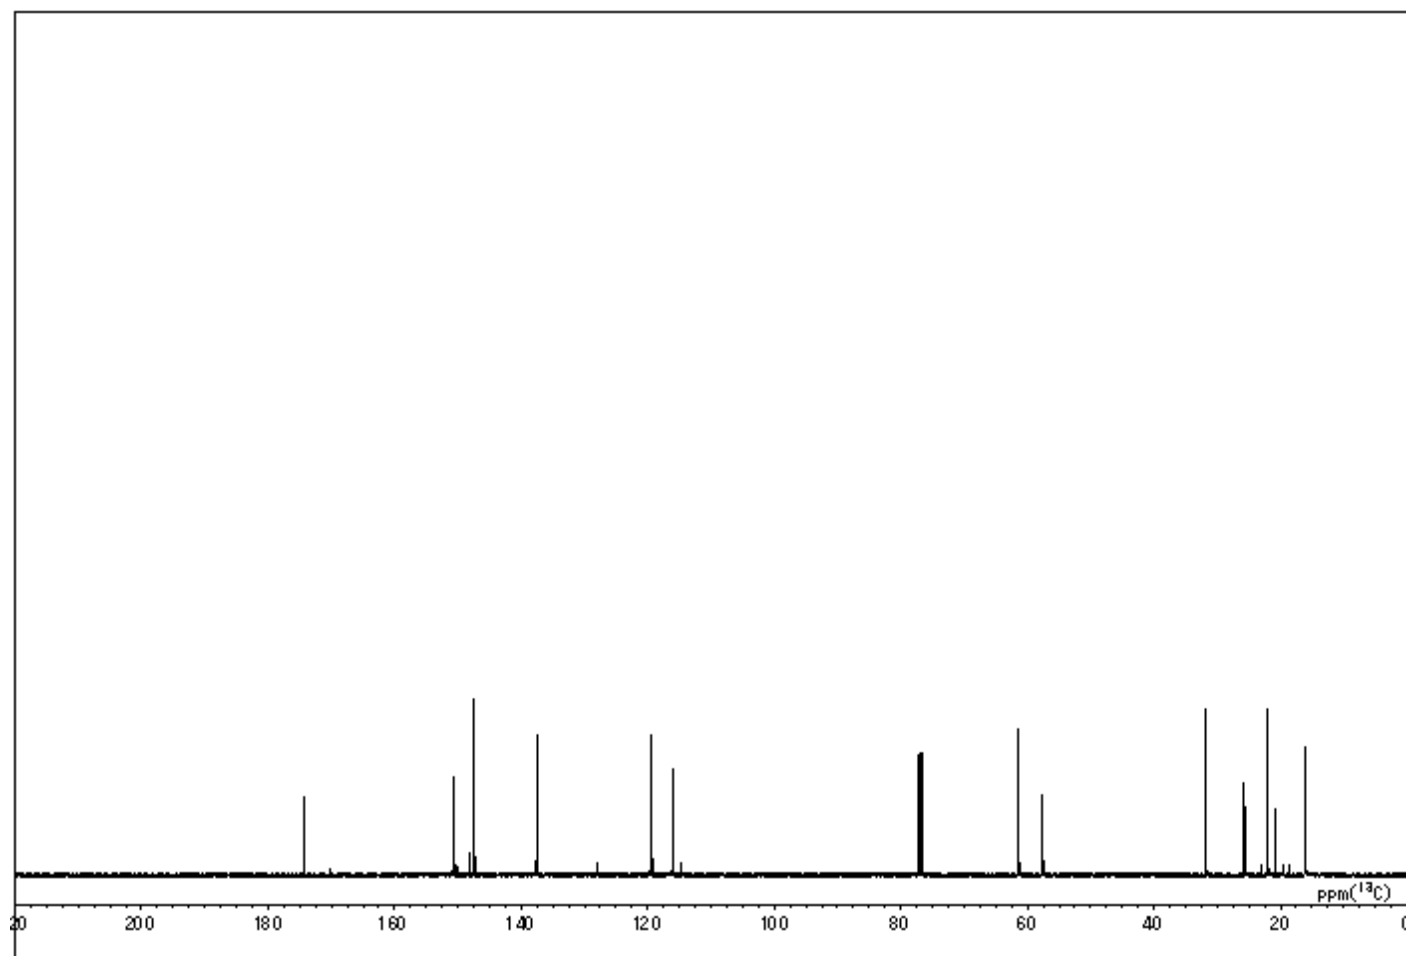

| No. | Start(ppm) | End(ppm) | Integral |
|-----|------------|----------|----------|
| 1   | 1.9265     | 1.6735   | 3.1804   |
| 2   | 2.4154     | 2.2001   | 2.9579   |
| 3   | 2.7622     | 2.5791   | 2.0      |
| 4   | 3.7136     | 3.5682   | 0.9715   |
| 5   | 6.5469     | 6.1153   | 0.9004   |
| 6   | 7.3815     | 7.1033   | 5.2232   |

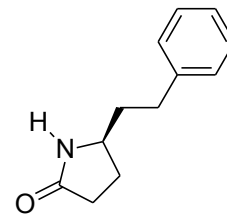

**4a**

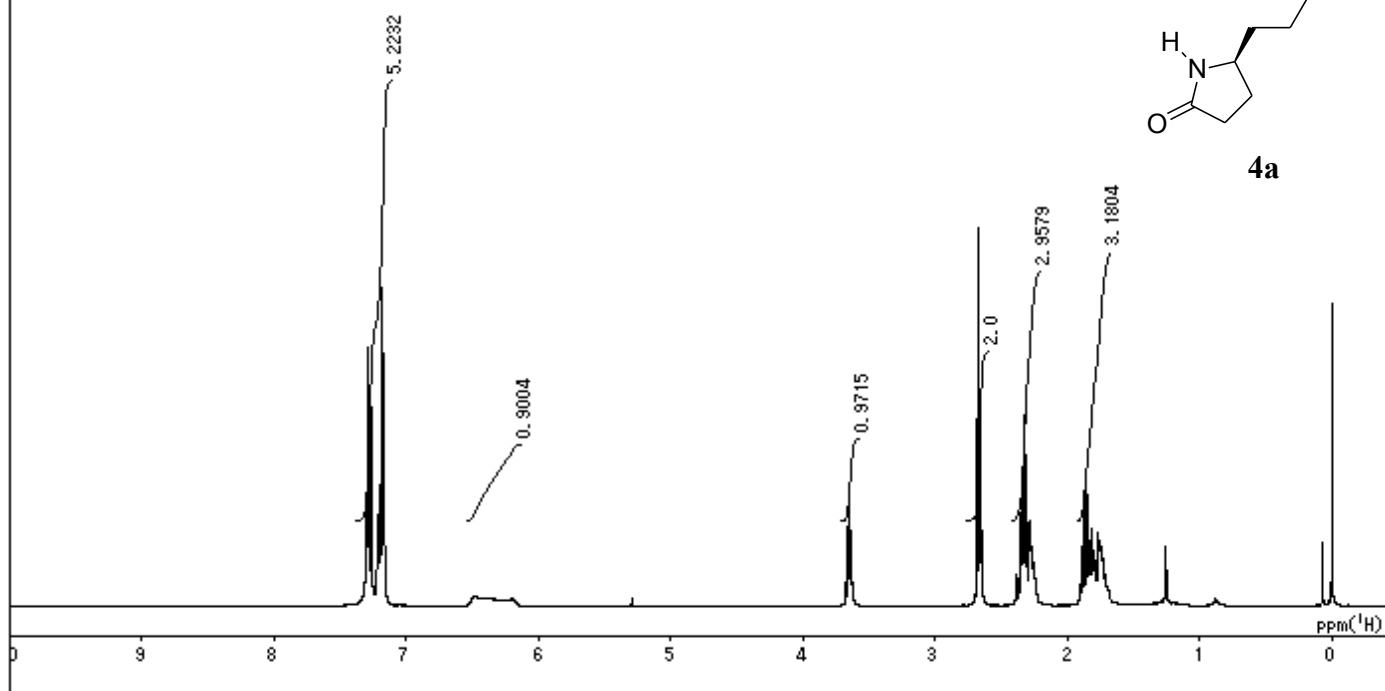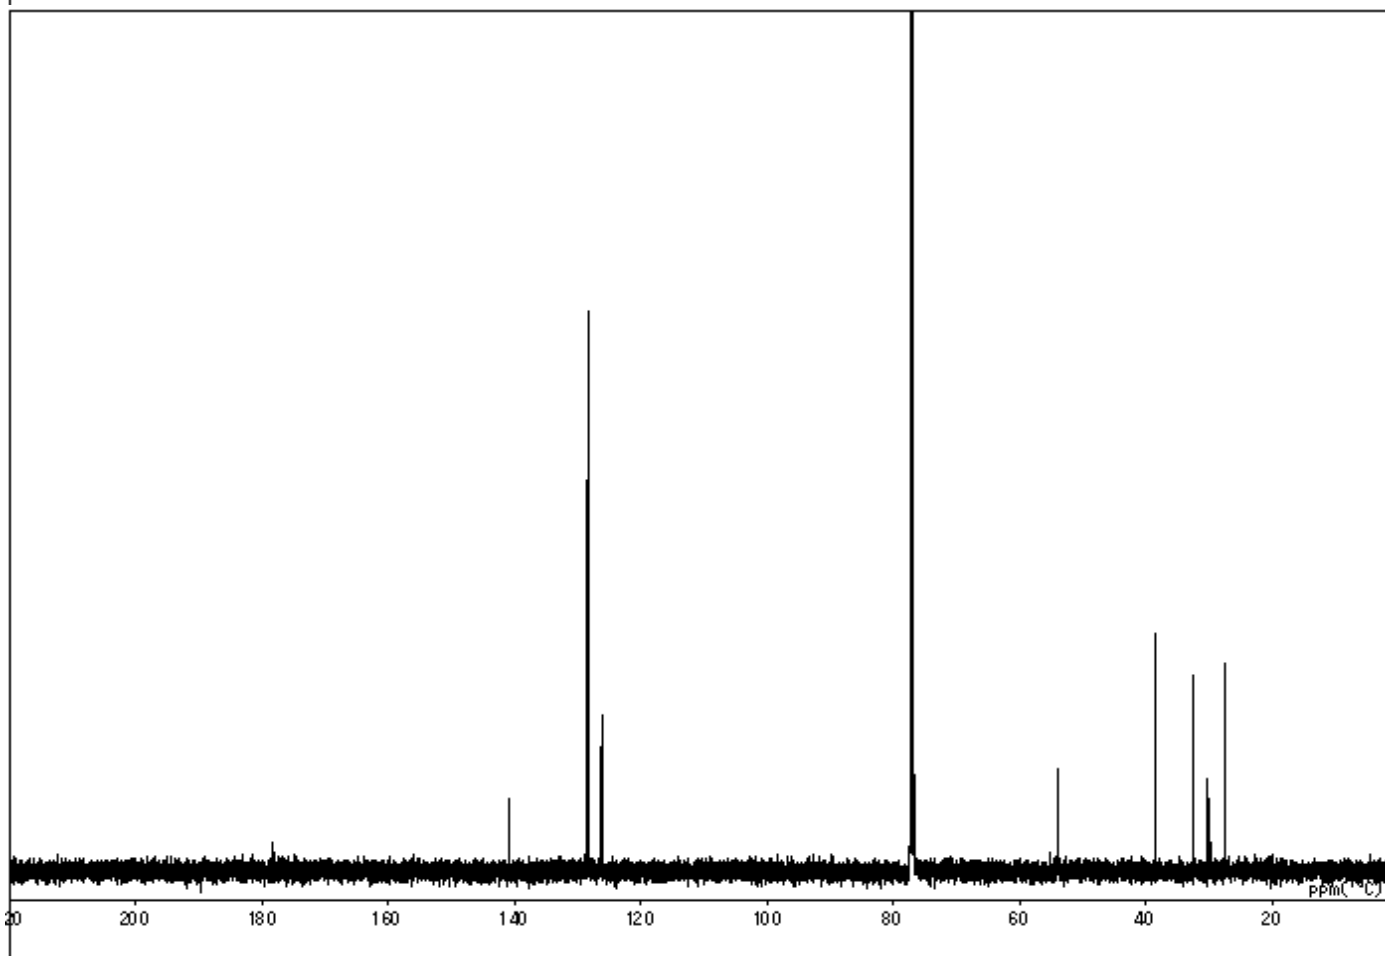

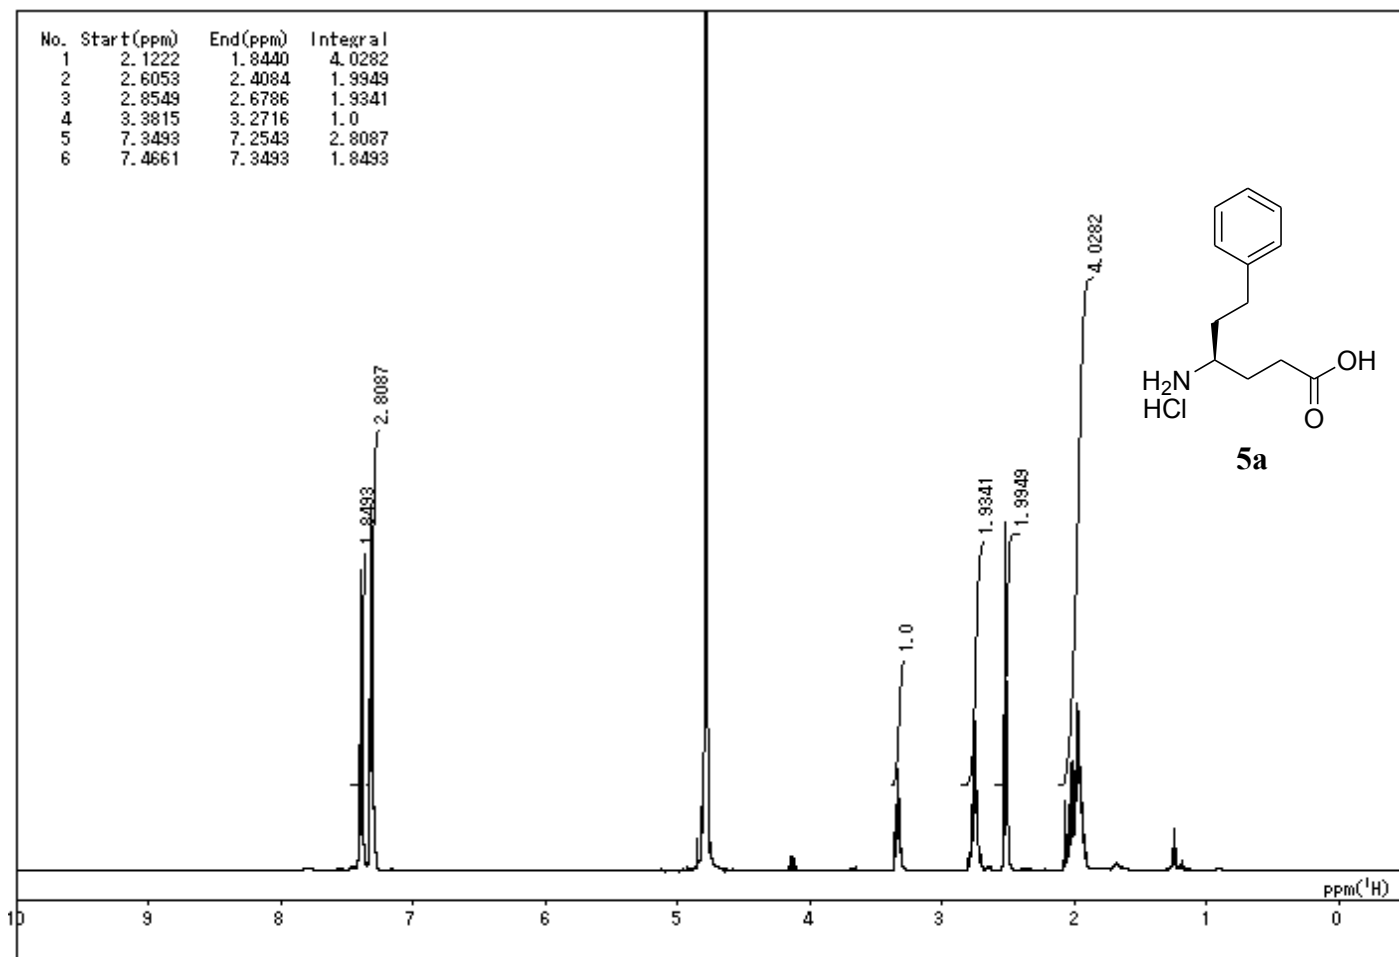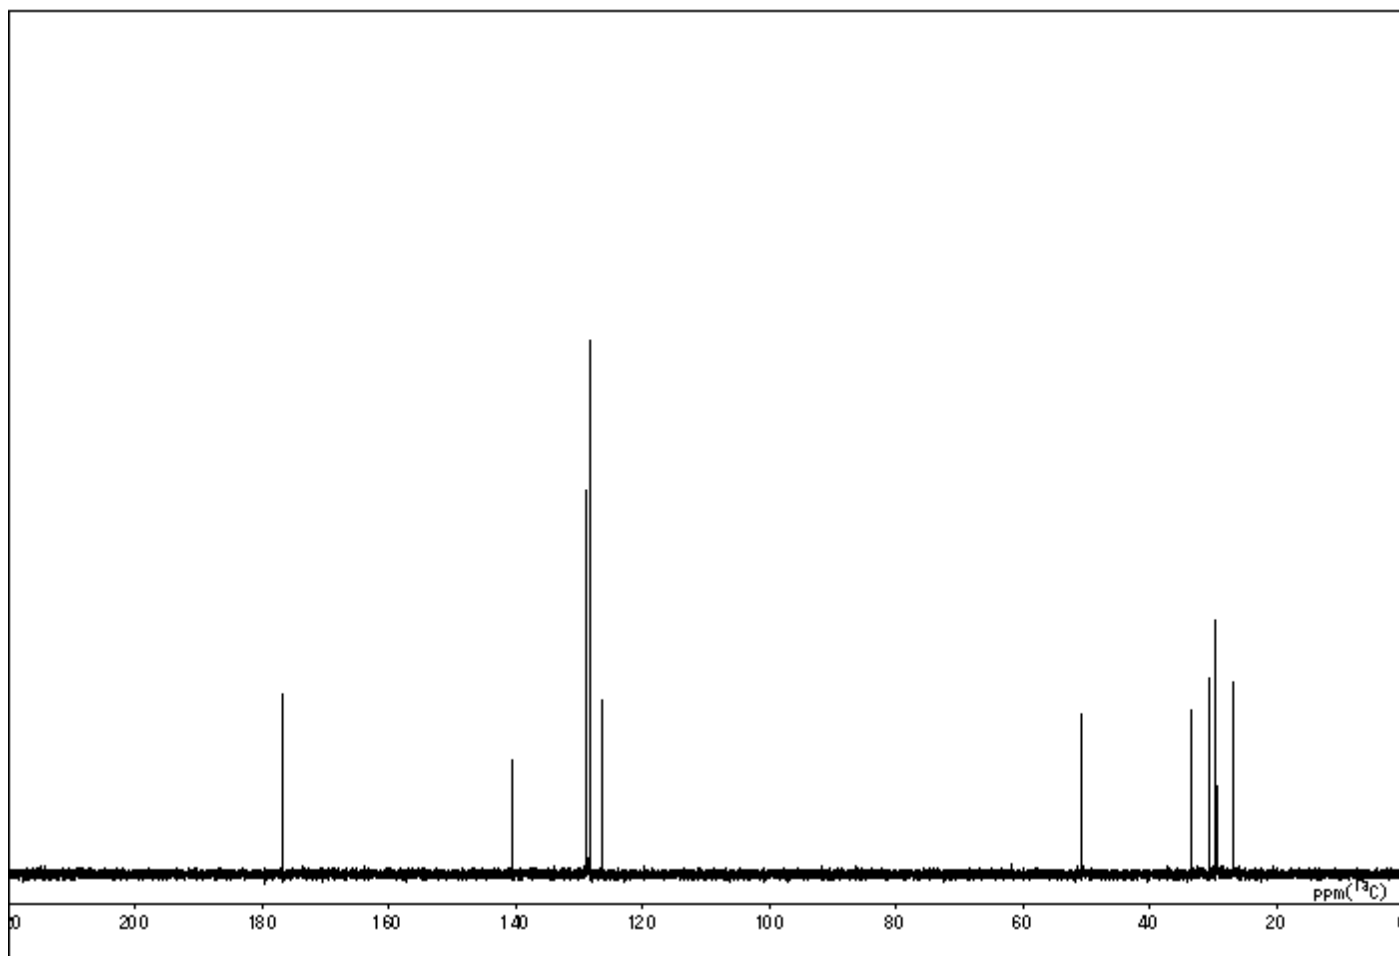

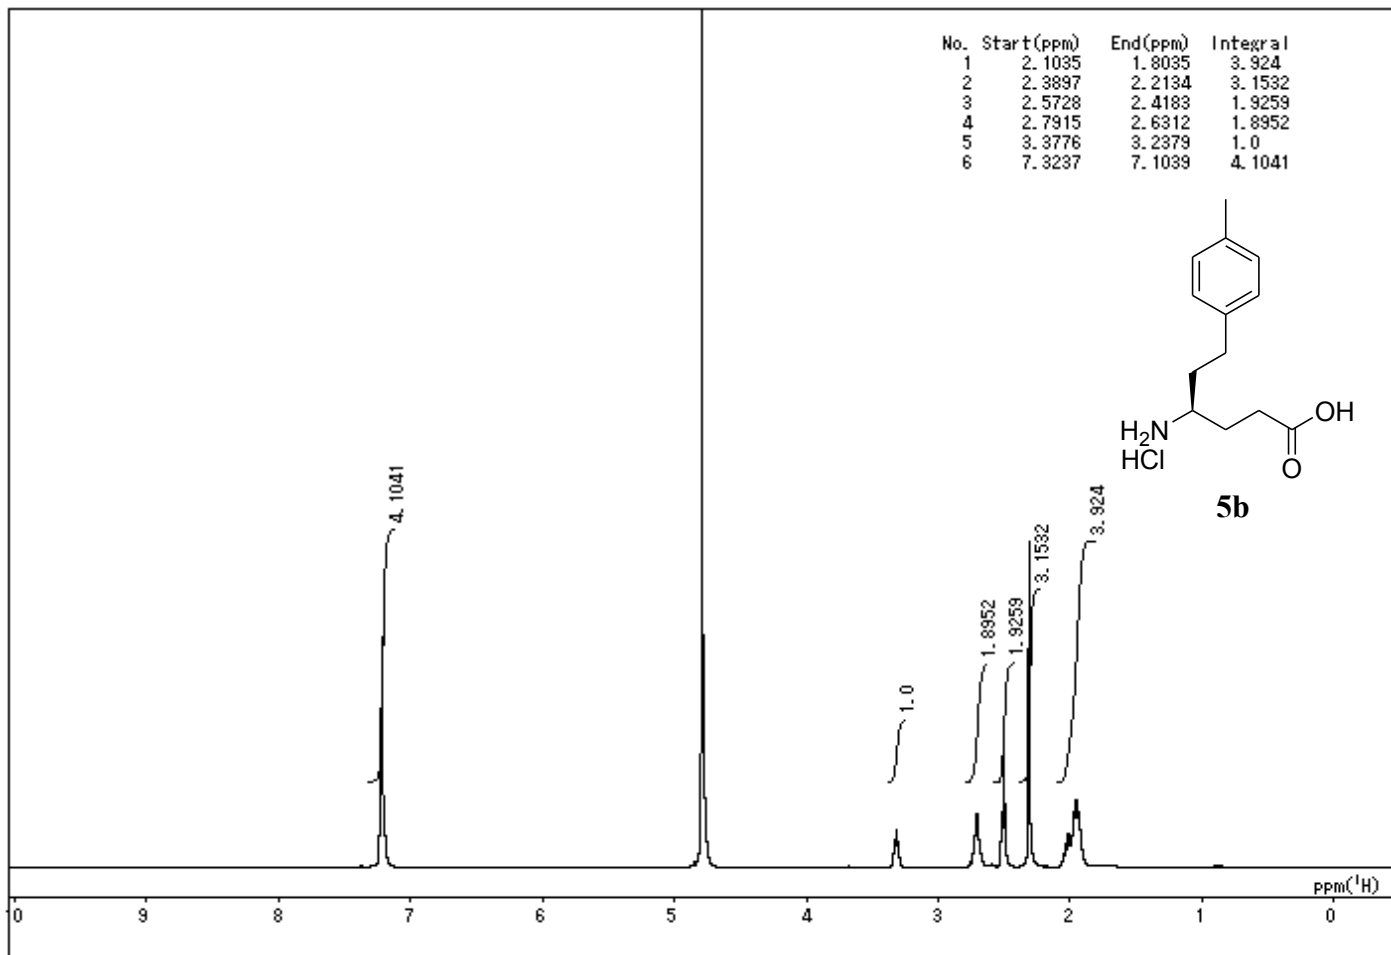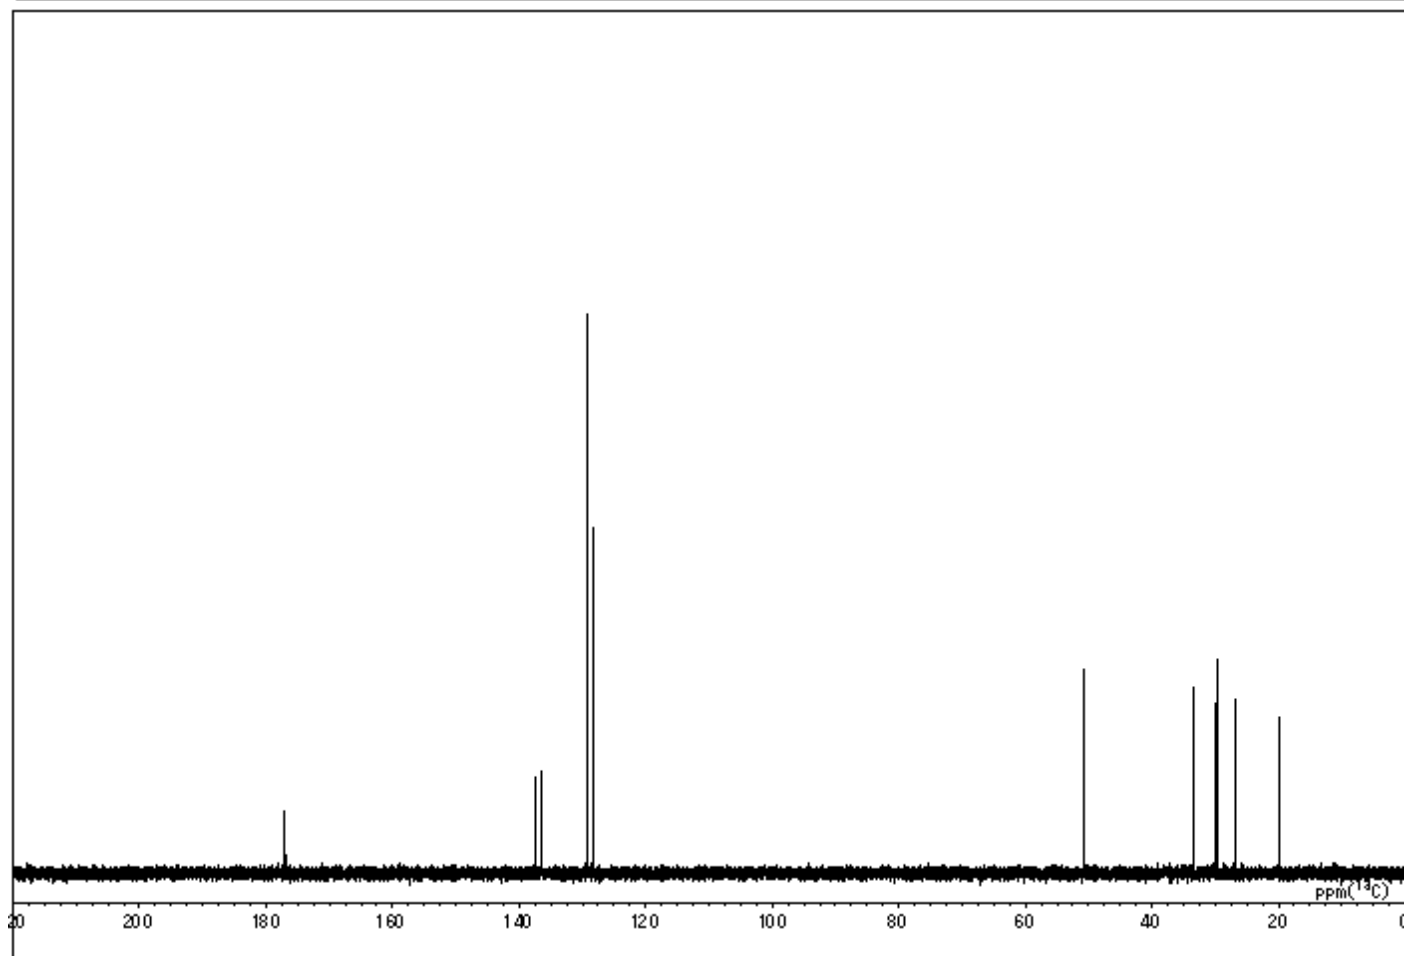

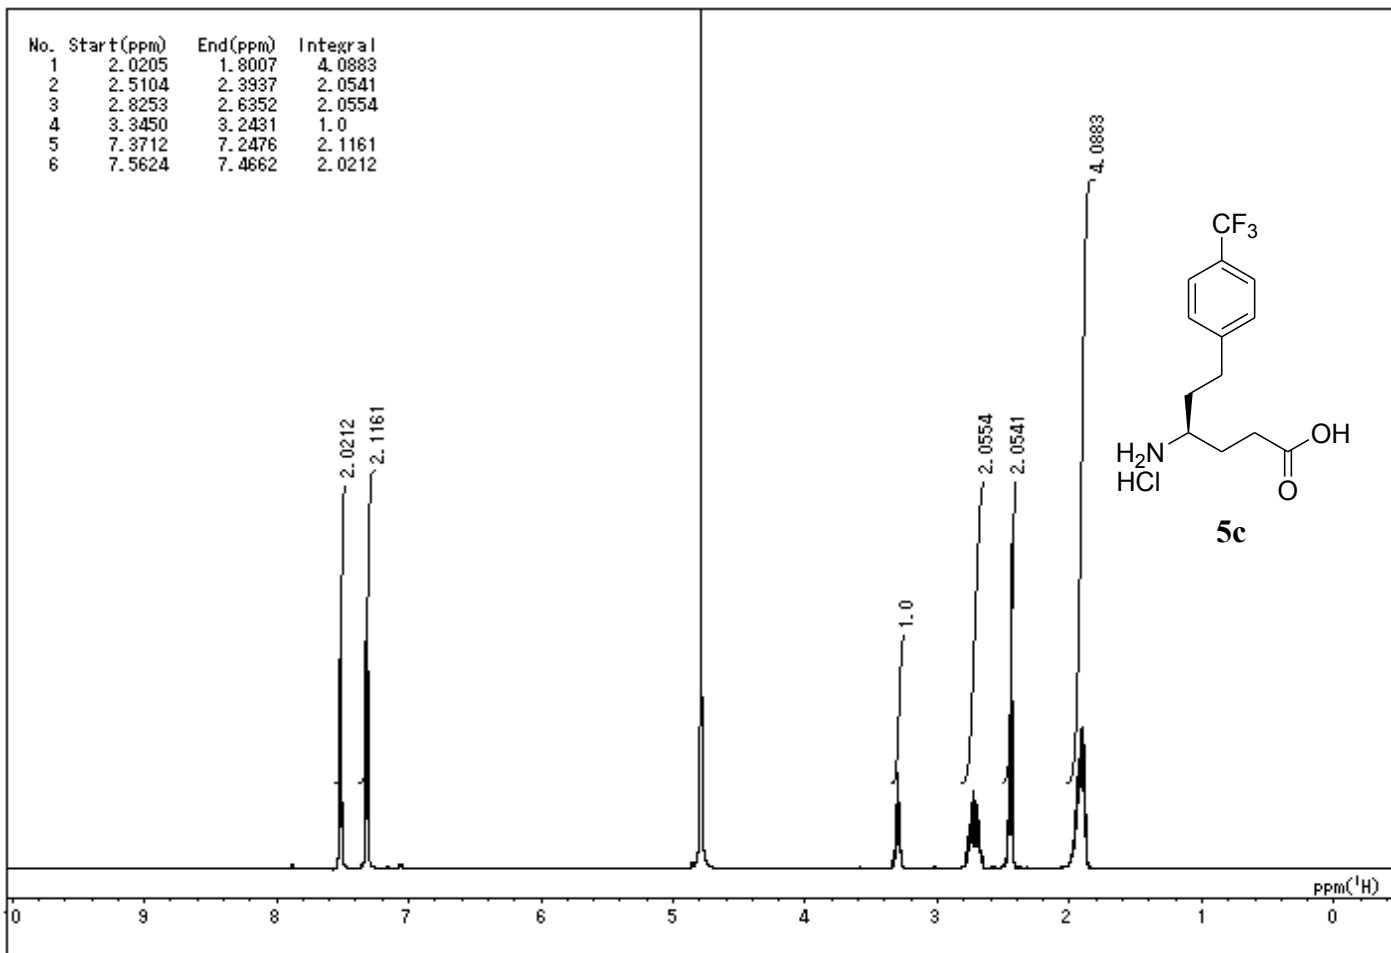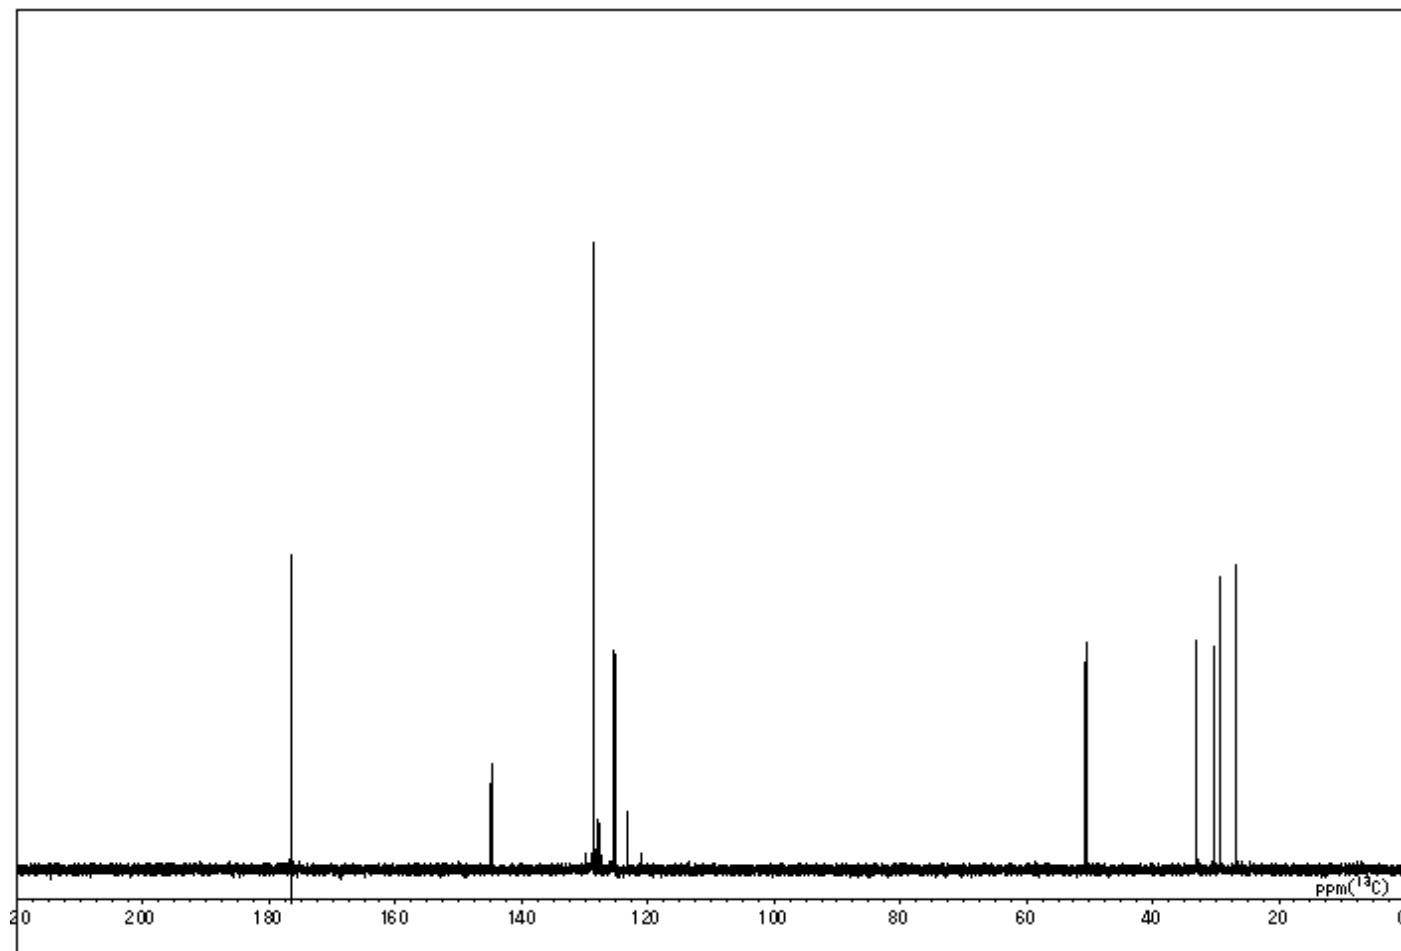

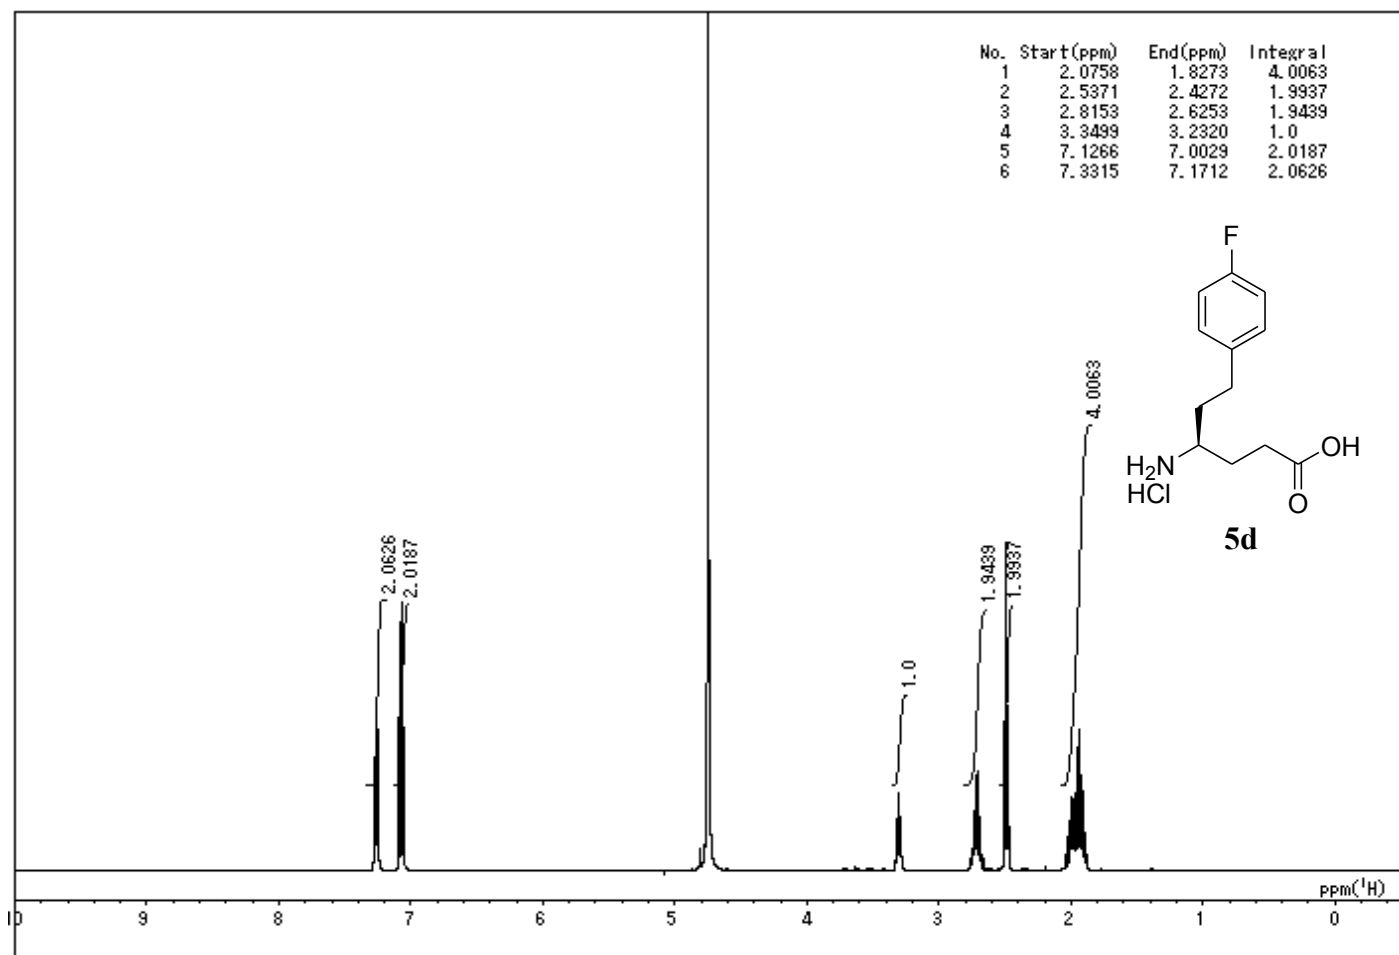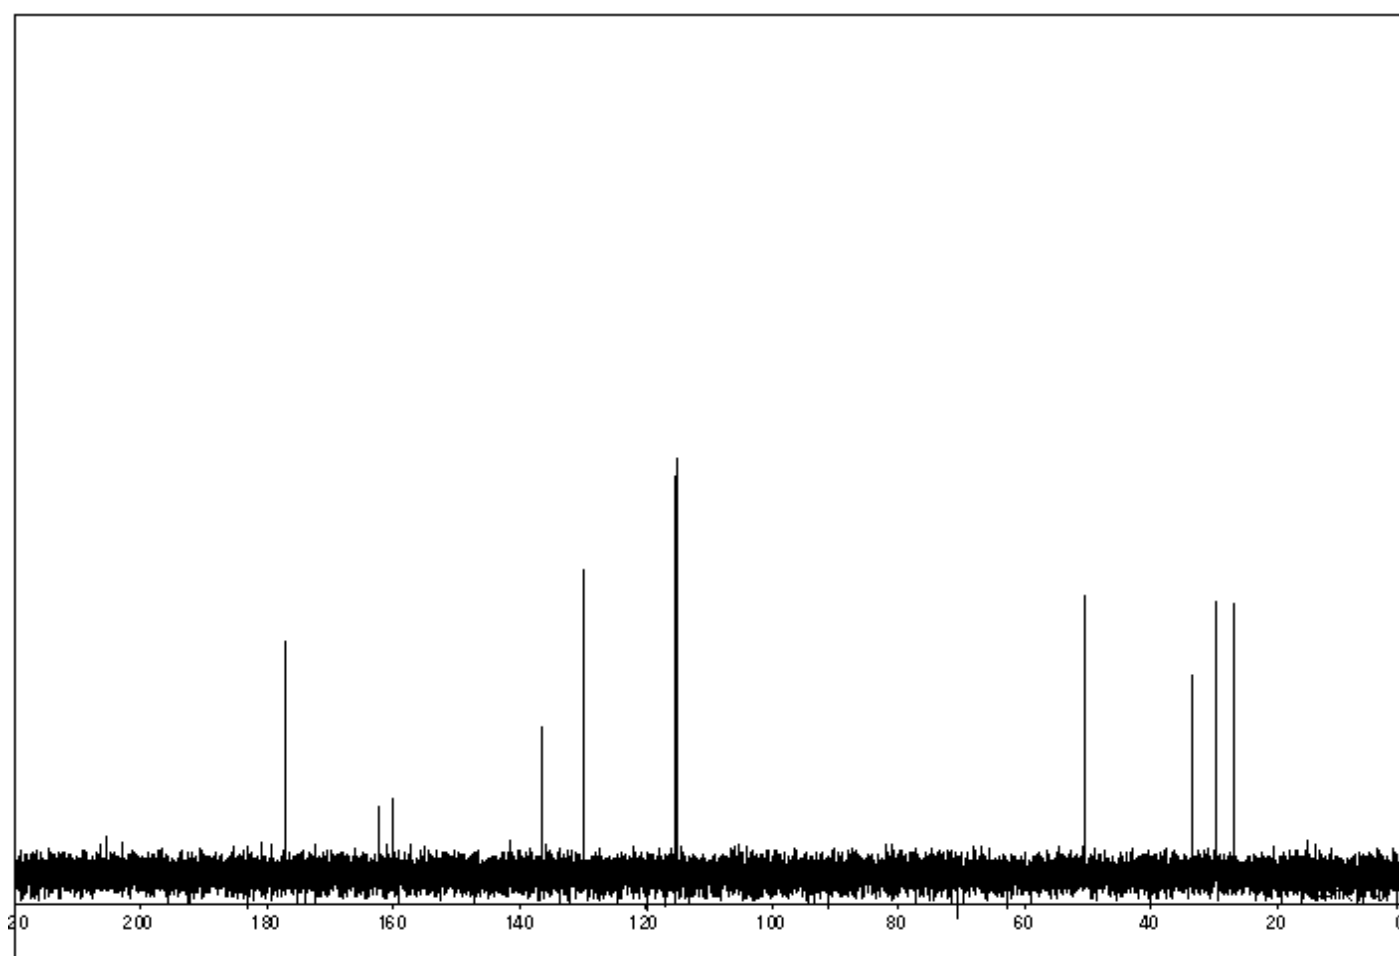



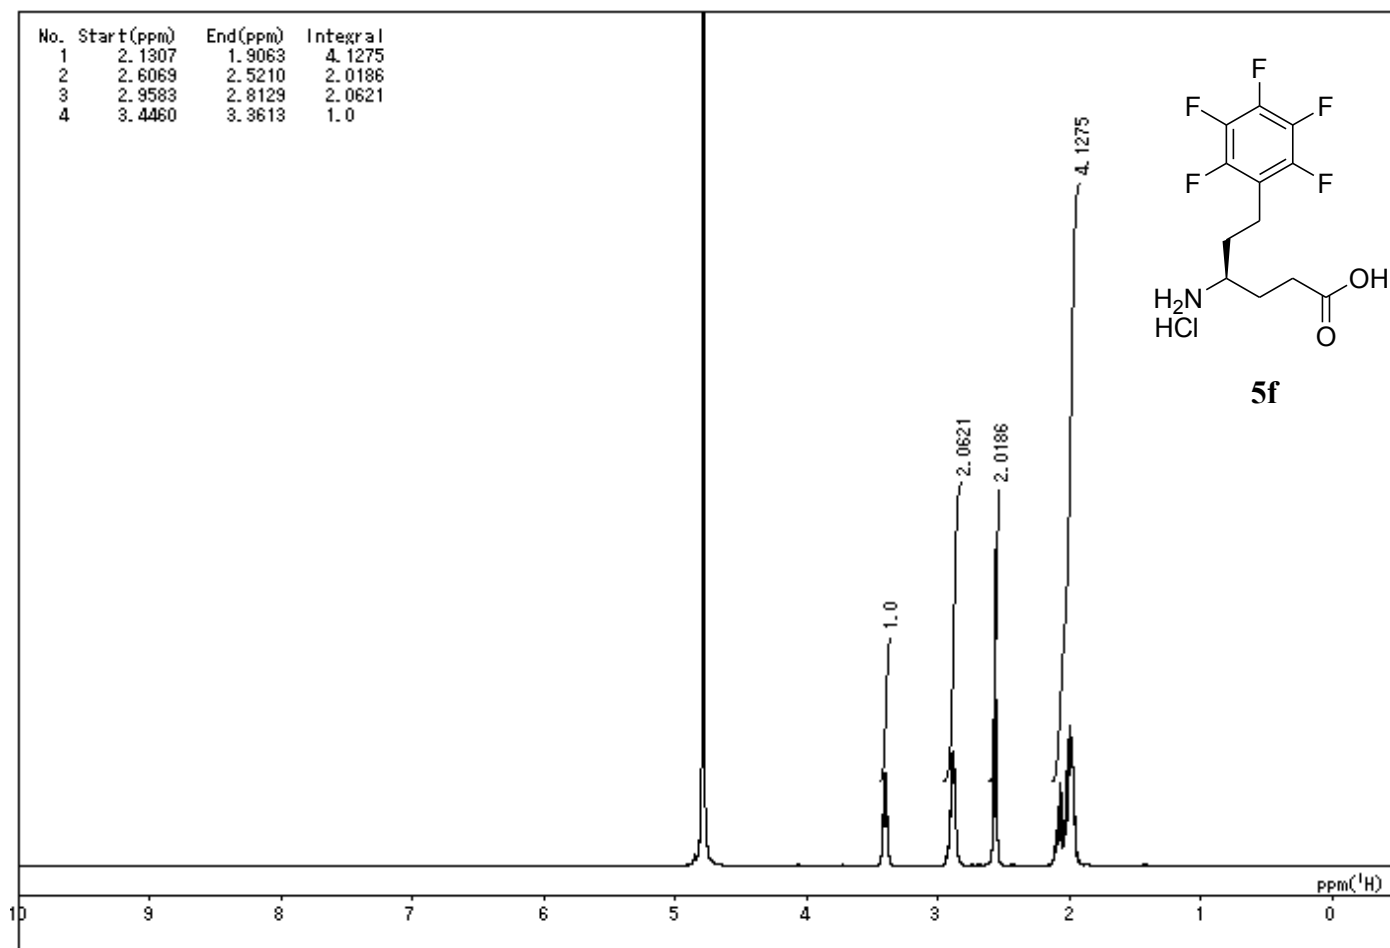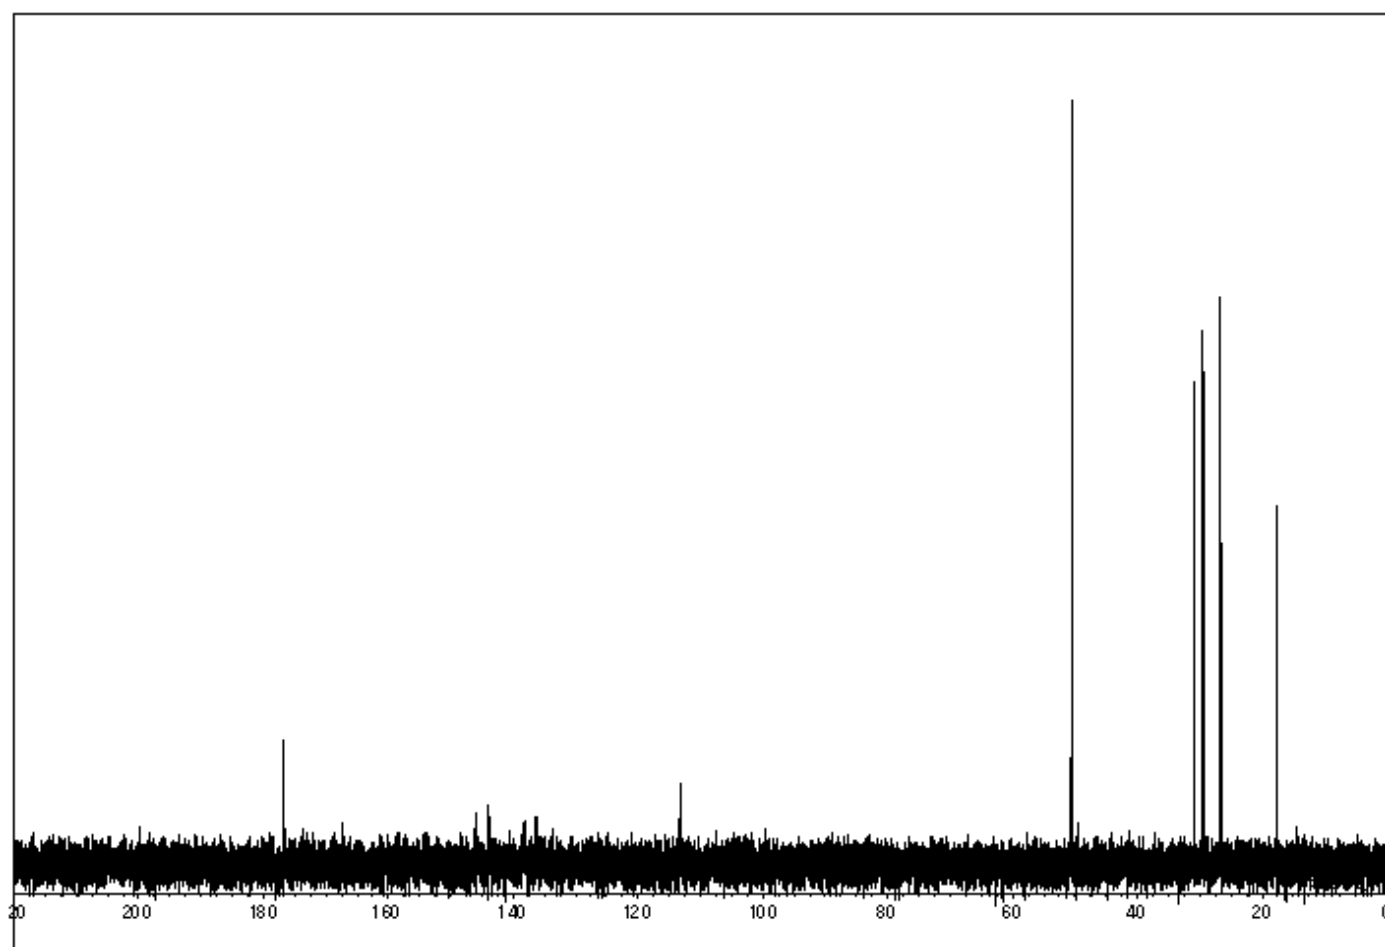

| No. | Start(ppm) | End(ppm) | Integral |
|-----|------------|----------|----------|
| 1   | 1.9960     | 1.8483   | 2.1447   |
| 2   | 2.1151     | 2.0166   | 2.0745   |
| 3   | 2.5146     | 2.4138   | 2.0635   |
| 4   | 3.5025     | 3.4155   | 1.0      |
| 5   | 3.6216     | 3.5140   | 2.0295   |
| 6   | 7.7600     | 7.6913   | 2.0686   |
| 7   | 7.8791     | 7.8161   | 1.0034   |
| 8   | 8.0084     | 7.9478   | 2.0333   |

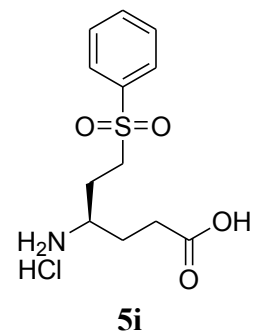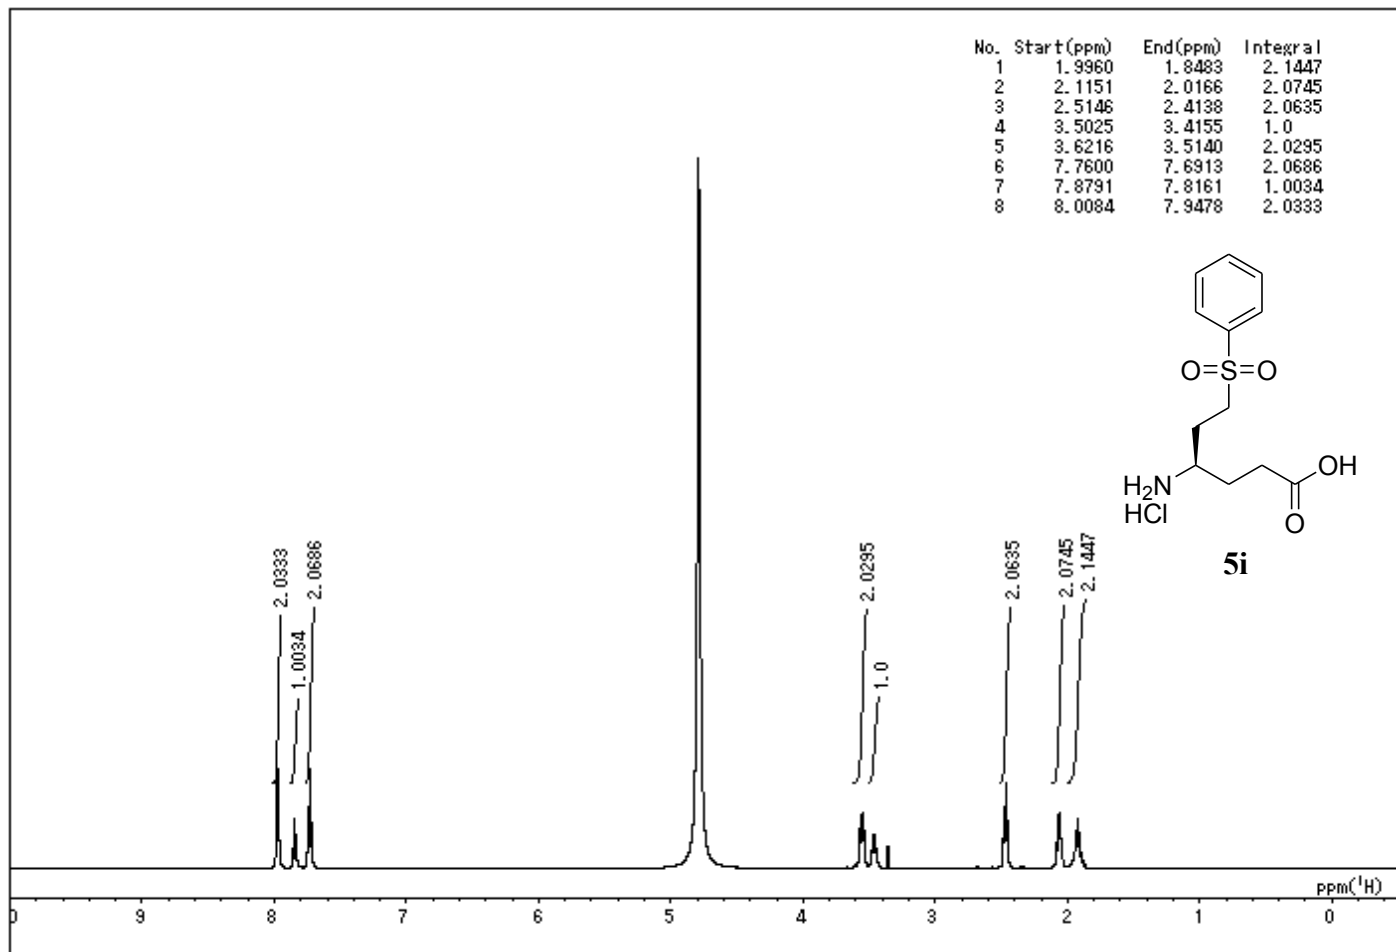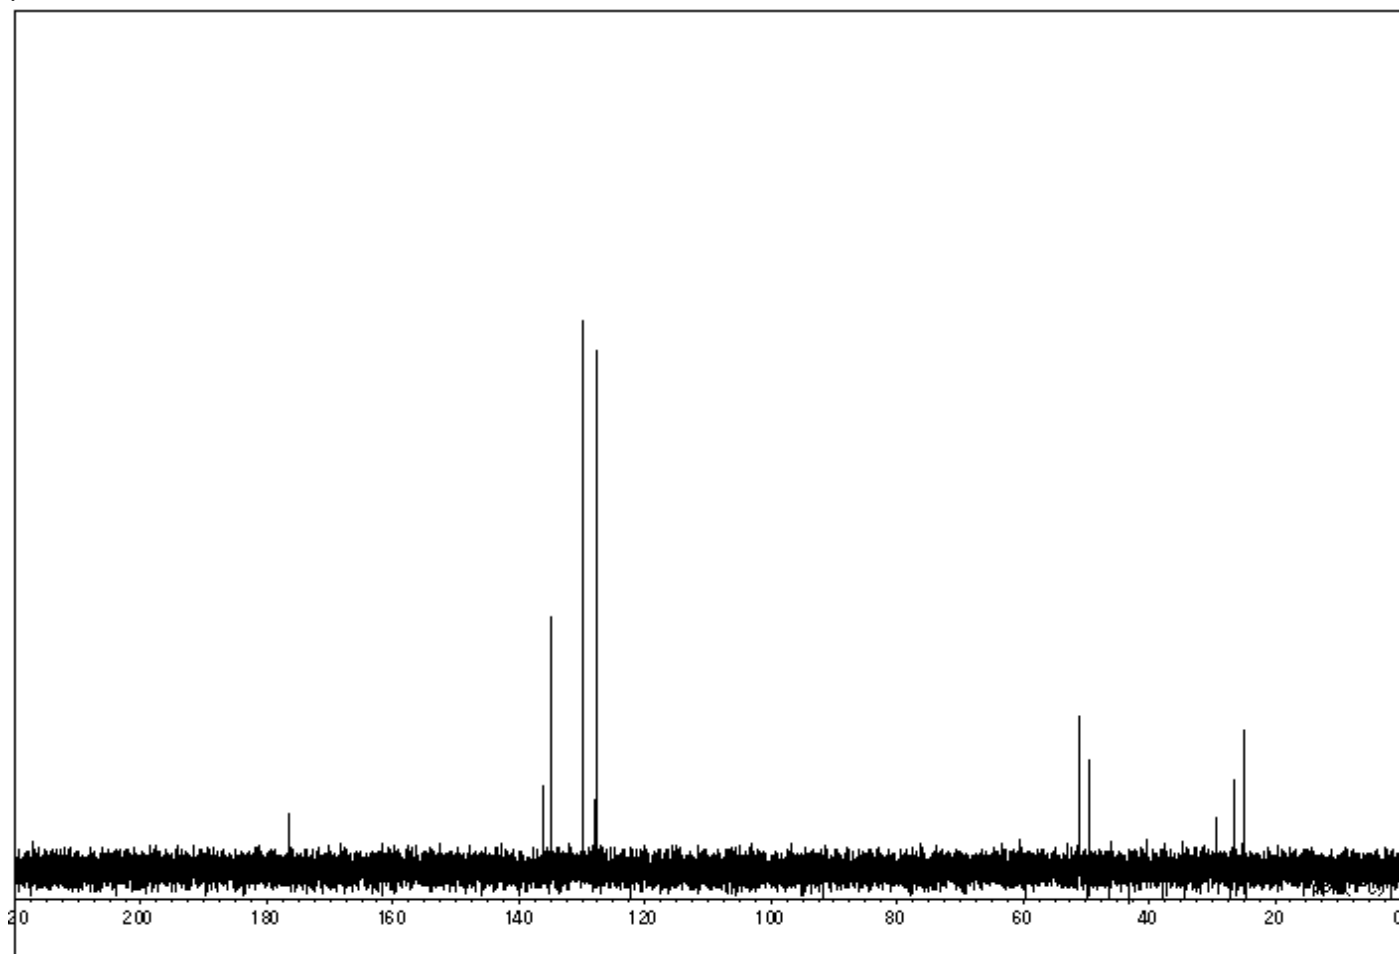

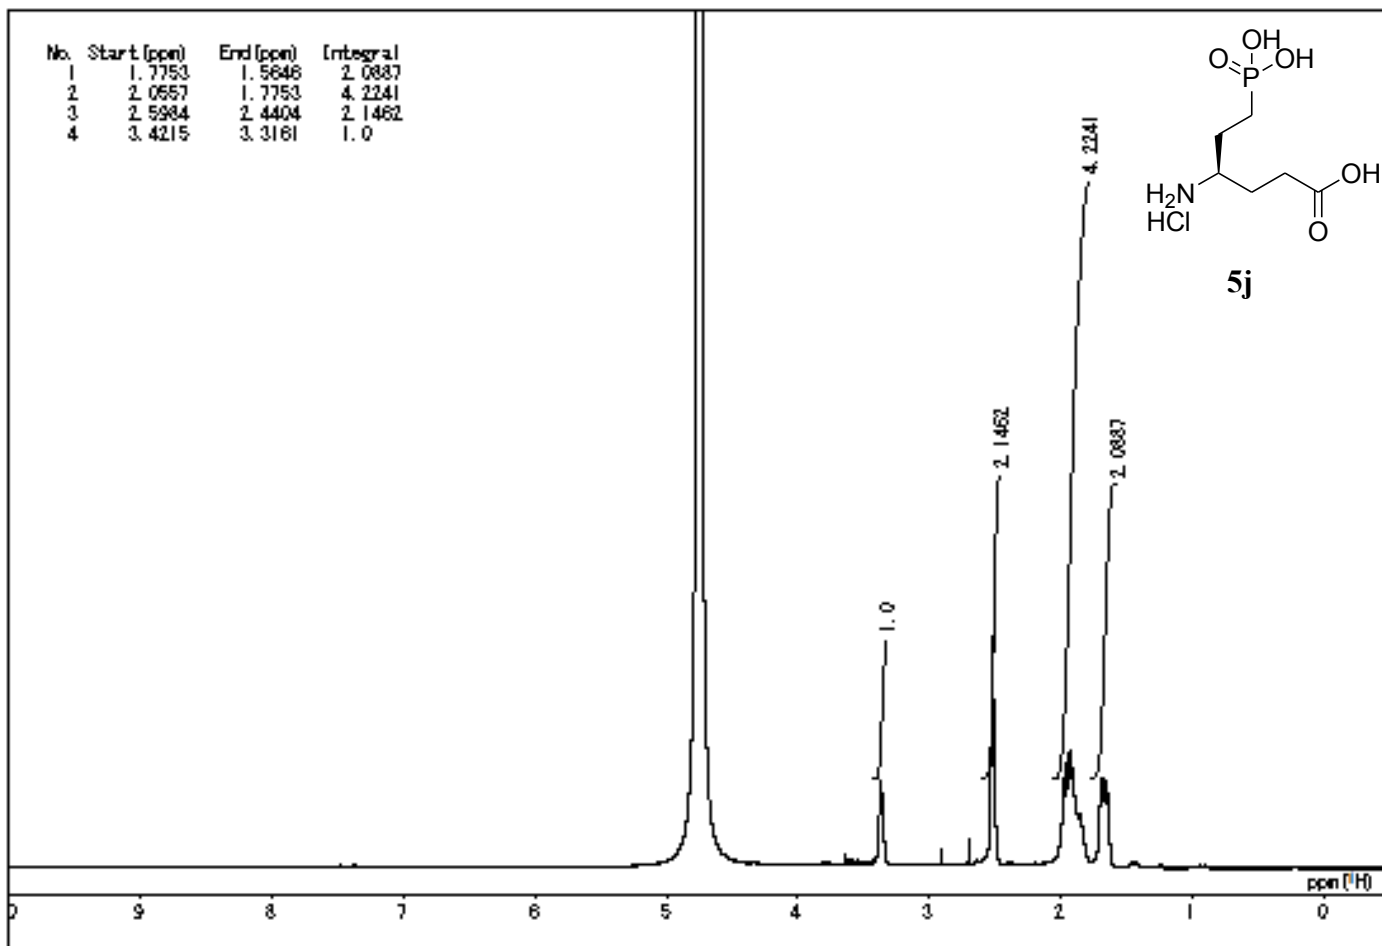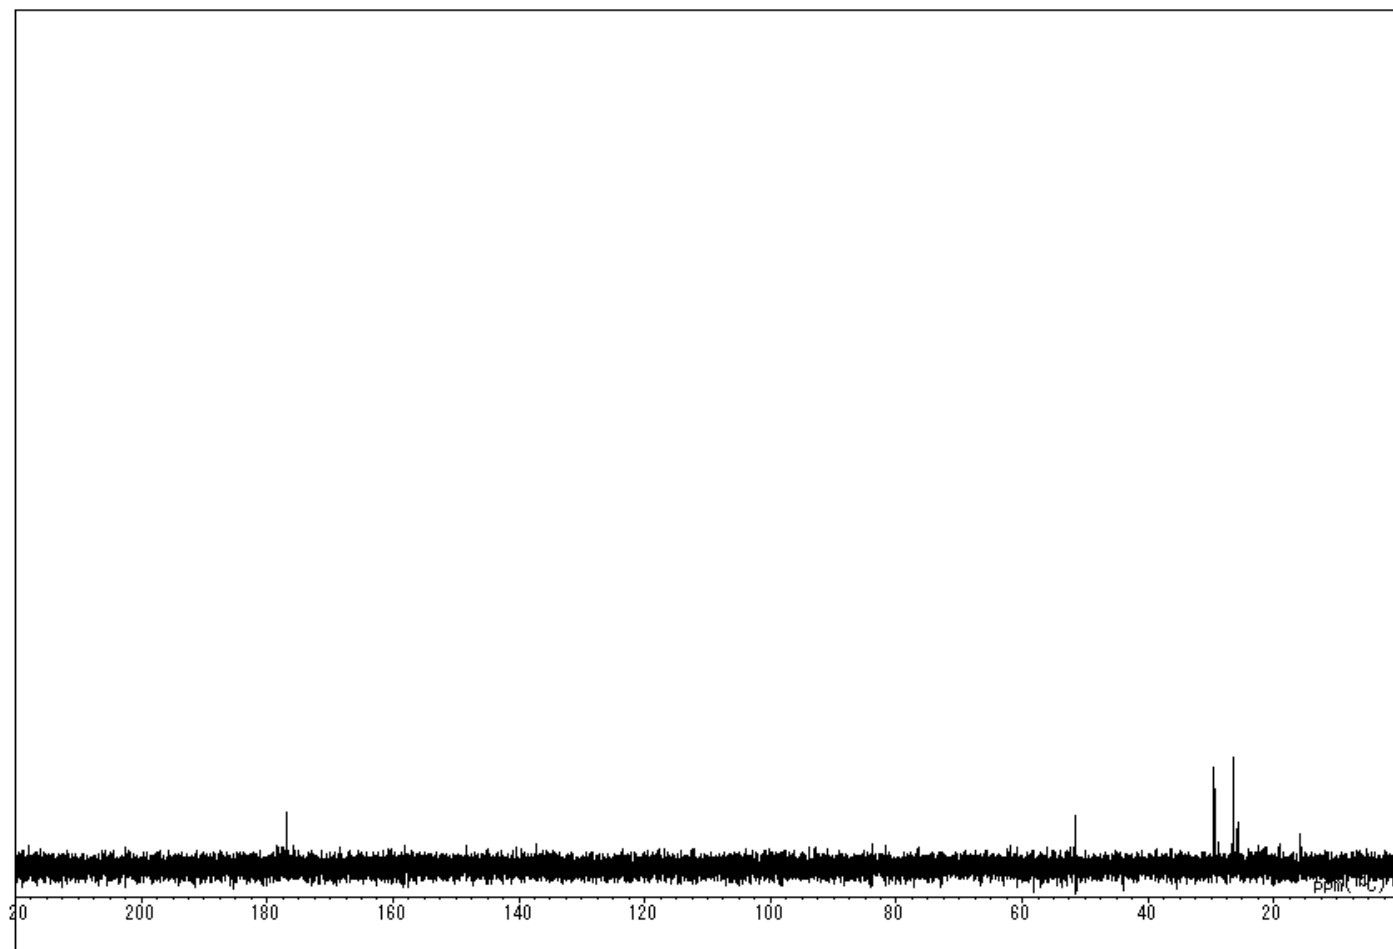

| No. | Start(ppm) | End(ppm) | Integral |
|-----|------------|----------|----------|
| 1   | 1.5821     | 1.4711   | 1.9714   |
| 2   | 1.7756     | 1.5855   | 3.1095   |
| 3   | 2.3560     | 2.1671   | 3.3837   |
| 4   | 2.4979     | 2.4247   | 3.1402   |
| 5   | 3.6416     | 3.5271   | 1.1246   |
| 6   | 4.1018     | 3.9553   | 2.0952   |
| 7   | 7.3919     | 7.3209   | 1.9859   |
| 8   | 7.5453     | 7.4400   | 0.9934   |
| 9   | 7.8281     | 7.7113   | 2.0      |

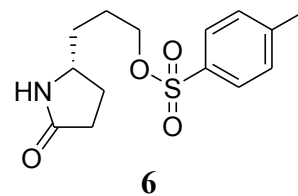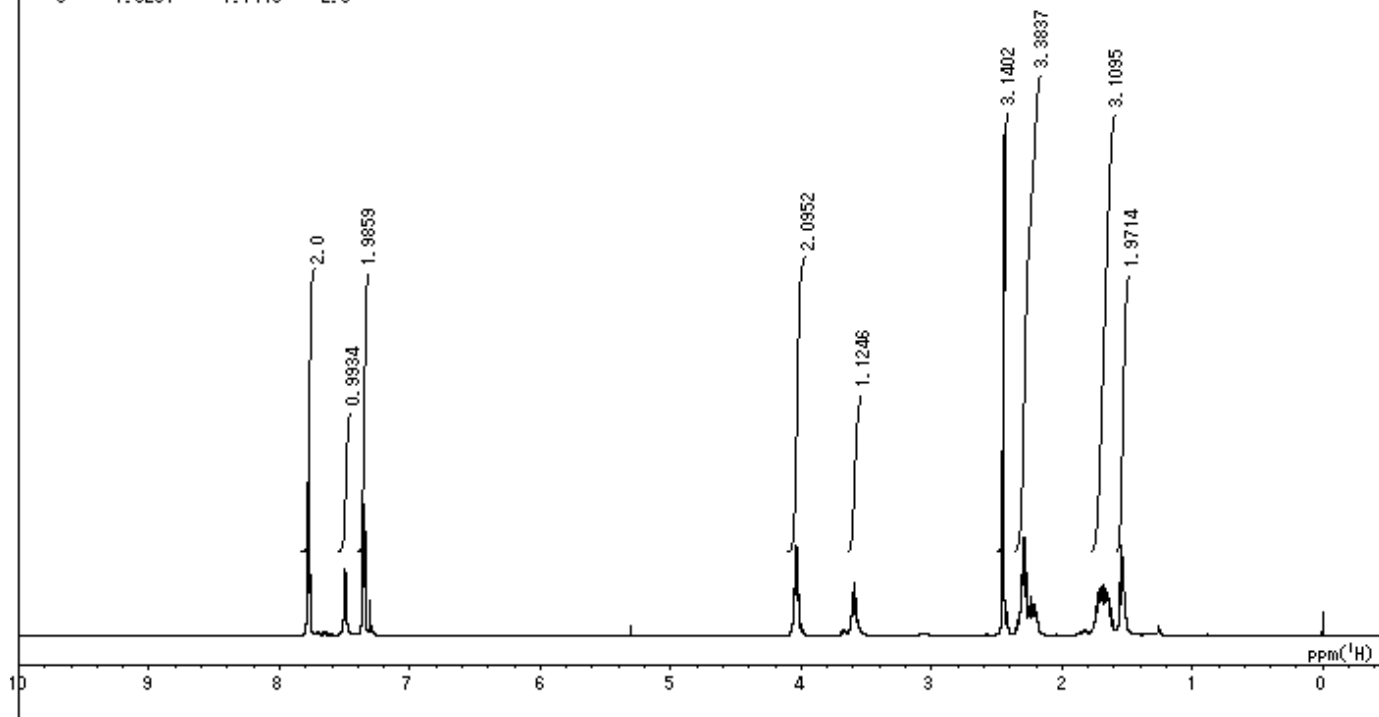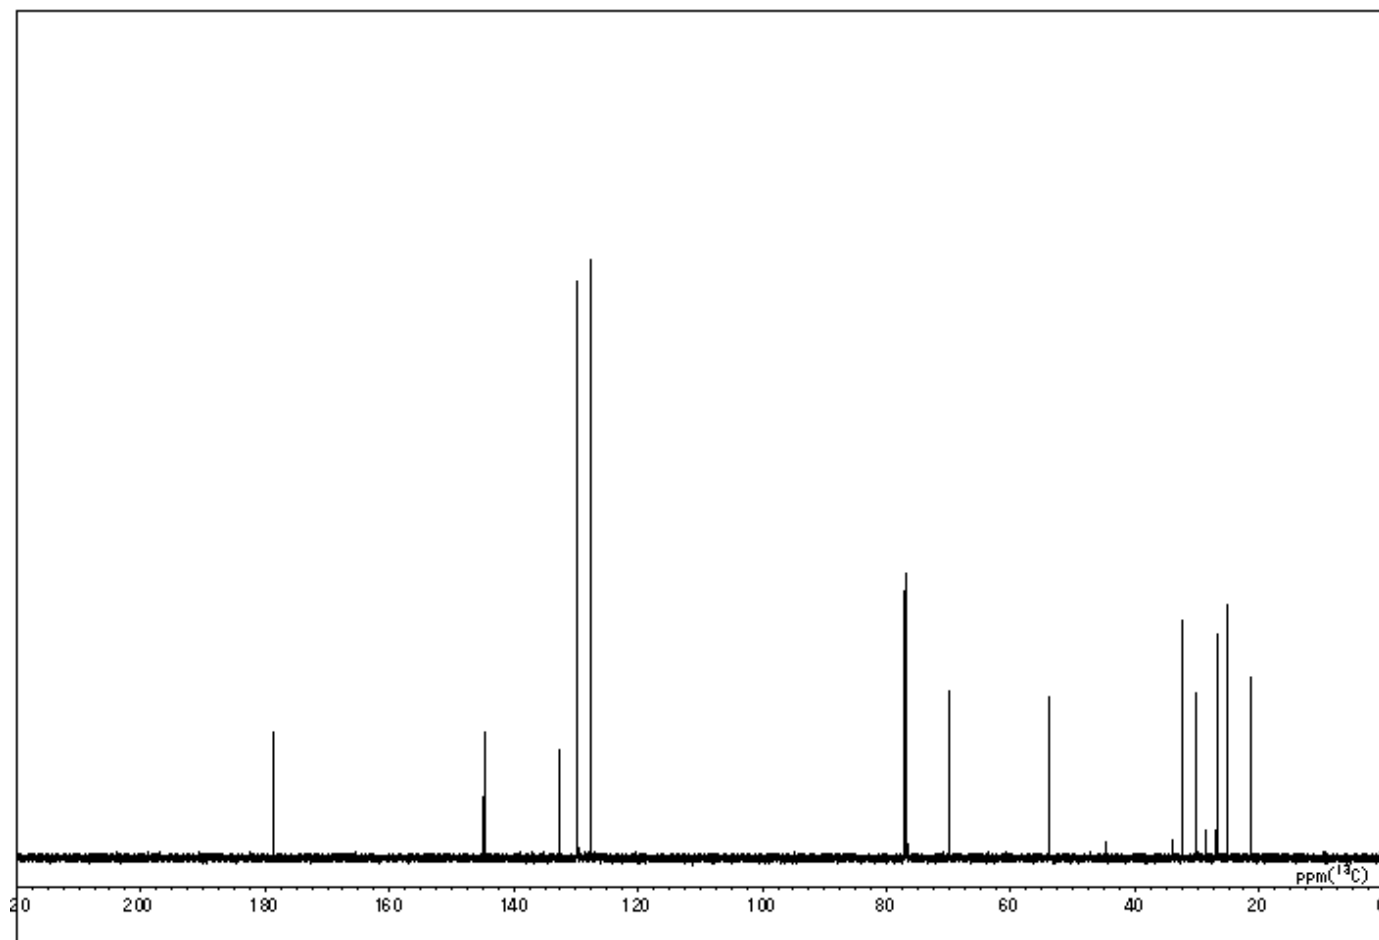

## Reference

1. A. Klapars, X. Huang, S. L. Buchwald, *J. Am. Chem. Soc.*, 2002, **124**, 7421–7428.
2. M. L. H. Mantel, A. T. Lindhardt, D. Lupp, T. Skrydstrup, *Chem. Eur. J.*, 2010, **16**, 5437 – 5442.
3. V. Smout, A. Peschiulli, S. Verbeeck, E. A. Mitchell, W. Herrebout, P. Bultinck, C. M. L. V. Velde, D. Berthelot, L. Meerpoel, B. U. W. Maes, *J. Org. Chem.*, 2013, **78**, 9803–9814.
4. S. Lemaire, G. Giambastiani, G. Prestat, G. Poli, *Eur. J. Org. Chem.*, 2004, 2840-2847.
5. R. Grote, A. Zeeck, J. Stümpfel, H. Zähler, *Liebigs Ann. Chem.*, 1990, 525-530.
